# Supplementary material for: Melatonin for sleep disorders in children with neurodevelopmental disorders: protocol for a systematic review with meta-analysis and Trial Sequential Analysis of randomised clinical trials
Source: PubMed Central journal article supplement — BMJ Open. 2022 Nov 29;12(11):e065520. doi: 10.1136/bmjopen-2022-065520 (PMC9710329; doi:10.1136/bmjopen-2022-065520), 2022-11-29
Supplement: bmjopen-2022-065520.draft_revisions.pdf [file bmjopen-2022-065520.draft_revisions.pdf]

# BMJ Open

BMJ Open is committed to open peer review. As part of this commitment we make the peer review history of every article we publish publicly available.

When an article is published we post the peer reviewers' comments and the authors' responses online. We also post the versions of the paper that were used during peer review. These are the versions that the peer review comments apply to.

The versions of the paper that follow are the versions that were submitted during the peer review process. They are not the versions of record or the final published versions. They should not be cited or distributed as the published version of this manuscript.

BMJ Open is an open access journal and the full, final, typeset and author-corrected version of record of the manuscript is available on our site with no access controls, subscription charges or pay-per-view fees (<http://bmjopen.bmj.com>).

If you have any questions on BMJ Open's open peer review process please email [info.bmjopen@bmj.com](mailto:info.bmjopen@bmj.com)

# BMJ Open

## Melatonin for sleep disorders in children with neurodevelopmental disorders: a protocol for a systematic review with meta-analysis and Trial Sequential Analysis of randomised clinical trials

|                               |                                                                                                                                                                                                                                                                                                                                                                                                                                                                                                                                                                                                                                                                                                                                                                                                                                                                                                                                                              |
|-------------------------------|--------------------------------------------------------------------------------------------------------------------------------------------------------------------------------------------------------------------------------------------------------------------------------------------------------------------------------------------------------------------------------------------------------------------------------------------------------------------------------------------------------------------------------------------------------------------------------------------------------------------------------------------------------------------------------------------------------------------------------------------------------------------------------------------------------------------------------------------------------------------------------------------------------------------------------------------------------------|
| Journal:                      | <i>BMJ Open</i>                                                                                                                                                                                                                                                                                                                                                                                                                                                                                                                                                                                                                                                                                                                                                                                                                                                                                                                                              |
| Manuscript ID                 | bmjopen-2022-065520                                                                                                                                                                                                                                                                                                                                                                                                                                                                                                                                                                                                                                                                                                                                                                                                                                                                                                                                          |
| Article Type:                 | Protocol                                                                                                                                                                                                                                                                                                                                                                                                                                                                                                                                                                                                                                                                                                                                                                                                                                                                                                                                                     |
| Date Submitted by the Author: | 08-Jun-2022                                                                                                                                                                                                                                                                                                                                                                                                                                                                                                                                                                                                                                                                                                                                                                                                                                                                                                                                                  |
| Complete List of Authors:     | Jørgensen, Caroline Kamp; Rigshospitalet Copenhagen Trial Unit; Syddansk Universitet Det Sundhedsvidenskabelige Fakultet, Department of Regional Health Research<br>Hermann, Rikke; Center for Educational Development<br>Juul, Sophie ; Rigshospitalet Copenhagen Trial Unit<br>Faltermeier, Pascal; MSH Medical School Hamburg<br>Horowitz, Mark; University College London Division of Psychiatry; North East London NHS Foundation Trust, Research and Development Department<br>Moncrieff, Joanna; University College London Division of Psychiatry; North East London NHS Foundation Trust, Research and Development Department<br>Gluud, Christian; Rigshospitalet Copenhagen Trial Unit; Syddansk Universitet Det Sundhedsvidenskabelige Fakultet, Department of Regional Health Research<br>Jakobsen, Janus; Rigshospitalet Copenhagen Trial Unit; Syddansk Universitet Det Sundhedsvidenskabelige Fakultet, Department of Regional Health Research |
| Keywords:                     | SLEEP MEDICINE, Paediatric neurology < NEUROLOGY, Developmental neurology & neurodisability < PAEDIATRICS                                                                                                                                                                                                                                                                                                                                                                                                                                                                                                                                                                                                                                                                                                                                                                                                                                                    |
|                               |                                                                                                                                                                                                                                                                                                                                                                                                                                                                                                                                                                                                                                                                                                                                                                                                                                                                                                                                                              |

SCHOLARONE™  
Manuscripts

# Melatonin for sleep disorders in children with neurodevelopmental disorders: a protocol for a systematic review with meta-analysis and Trial Sequential Analysis of randomised clinical trials

Caroline Kamp Jørgensen<sup>1,2\*</sup>, Rikke Hermann<sup>1,3</sup>, Sophie Juul<sup>1</sup>, Pascal Faltermeier<sup>4</sup>, Mark Horowitz<sup>5,6</sup>, Joanna Moncrieff<sup>5,6</sup>, Christian Glud<sup>1,2</sup>, Janus Christian Jakobsen<sup>1,2</sup>

## Contact information

\* Corresponding author: Caroline Kamp Jørgensen: [caroline.joergensen@ctu.dk](mailto:caroline.joergensen@ctu.dk)  
Copenhagen Trial Unit, Copenhagen University Hospital – Rigshospitalet, Blegdamsvej 9, DK-2100 Copenhagen Ø, Denmark

## Affiliations:

<sup>1</sup> Copenhagen Trial Unit, Centre for Clinical Intervention Research, Capital Region of Denmark, Copenhagen University Hospital – Rigshospitalet, Copenhagen, Denmark

<sup>2</sup> Department of Regional Health Research, Faculty of Health Sciences, University of Southern Denmark, Odense, Denmark

<sup>3</sup> Center for Educational Development, Rødovre, Denmark

<sup>4</sup> MSH Medical School Hamburg, University of Applied Sciences and Medical University, Hamburg, Germany

<sup>5</sup> Division of Psychiatry, University College London, London, UK

<sup>6</sup> Research and Development Department, North East London NHS Foundation Trust (NELFT), London, UK

**Word count:** 4,362

# Abstract

**Introduction:** Neurodevelopmental disorders are a group of disorders thought to be associated with the functioning of the brain and nervous system. Children with neurodevelopmental disorders often have sleep-related comorbidities that may negatively affect quality of life for both the children and their families. Melatonin is one of the most used interventions in children with neurodevelopmental disorders and sleep disorders. Previous reviews have investigated the effects of melatonin for sleep disorders in children with neurodevelopmental disorders, but these had important limitations, such as inadequate analysis of adverse effects, small sample sizes, and short follow-up. Moreover, new trials have been published recently. We aim to conduct this review to include all available evidence.

**Methods and analysis:** This is a protocol for a systematic review with meta-analysis and Trial Sequential Analysis of randomised clinical trials. The protocol is reported in accordance with Preferred Reporting Items for Systematic Reviews and Meta-Analysis Protocols. We will search for published and unpublished trials in major medical databases and trial registers. We will also request clinical study reports from regulatory authorities and pharmaceutical companies. Review authors working in pairs will screen reports, extract data, and conduct risk of bias assessments using the Cochrane Risk of Bias tool (version 2). We will include randomised clinical trials comparing melatonin versus placebo or no intervention for sleep disorders in children with neurodevelopmental disorders. Primary outcomes will be total sleep time and adverse effects. Secondary outcomes will be quality of life of the child and caregivers and sleep onset latency. Data will be analysed using random-effects and fixed-effect meta-analyses. Certainty of evidence will be assessed with GRADE.

**Ethics and dissemination:** Ethical approval was not required for this protocol. The results of the systematic review will be published in a peer-reviewed journal to help inform future research and clinical practice.

**PROSPERO registration number:** CRD42022337530

**Keywords:** Melatonin; neurodevelopmental disorders; sleep disorders; children; systematic review

## Strengths and limitations of this study

- This systematic review will investigate the effects of melatonin for sleep disorders in children with neurodevelopmental disorders. The results will inform future research and clinical practice.
- The predefined methodology is based on the Cochrane Handbook, the eight-step procedure suggested by Jakobsen et al., Trial Sequential Analysis, and GRADE assessment to consider the risks of random errors, systematic errors, publication bias, heterogeneity, and external validity.
- The systematic review will include both published and unpublished trials.
- We assess multiple outcomes and subgroup analyses which will increase the risks of type I errors.

# Introduction

## Description of the condition

Neurodevelopmental disorders are a group of disorders thought to be associated with the functioning of the brain and nervous system.<sup>1</sup> Neurodevelopmental disorders are usually diagnosed in childhood and include neurological disorders such as cerebral palsy, epilepsy, Angelman syndrome, Down's syndrome, Fragile X syndrome, Prader-Willi syndrome, Rett syndrome, Smith-Magenis syndrome, Williams syndrome, and non-specific intellectual disability, along with some psychiatric disorders including autism spectrum disorder, attention-deficit/hyperactivity disorder (ADHD).<sup>1,2</sup> Children with neurodevelopmental disorders may experience difficulties with learning, attention, behaviour, speech, motor skills, and other neurological functions.<sup>1</sup>

The impact of sleep disturbances was recently ranked as a top 10 research priority within the topics of children with neurodevelopmental disorders by a UK partnership of patients, carers, and clinicians.<sup>3</sup> Children with neurodevelopmental disorders often have sleep-related comorbidities, including sleep disorders such as insomnia disorder, hypersomnolence disorder, narcolepsy, breathing-related sleep disorders, circadian rhythm sleep disorders, non-rapid eye movement (REM) sleep arousal disorders, nightmare disorder, and REM sleep behaviour disorder.<sup>2,4</sup> Studies have shown the prevalence of comorbid neurodevelopmental disorders and sleep disorders is between 25% to 86% compared to 1% to 6% in the general paediatric population.<sup>4-8</sup> Sleep disorders may further enhance problems with learning and behaviour in children with neurodevelopmental disorders,<sup>4-8</sup> and often have a negative effect on quality of life for both the children and their families.<sup>9,10</sup>

## Description of the intervention

Melatonin is a naturally occurring hormone in both humans and animals.<sup>11</sup> Previously, melatonin was derived from animal pineal tissue,<sup>11</sup> but it is now developed synthetically and distributed in different forms, including capsules, tablets, gummies, and liquids.<sup>12</sup> Melatonin is available in many countries either sold as prescription-only medicine or as over-the-counter medicine to treat sleep disorders in both children and adults, as it is hypothesised to be associated with few adverse

1  
2  
3  
4 effects.<sup>11 13</sup> Furthermore, melatonin is one of the most commonly used interventions in children  
5 with neurodevelopmental disorders and sleep disorders.<sup>14-18</sup> The dosage recommendations vary  
6 according to country, but the UK National Health Service currently recommend treatment up to 13  
7 weeks of 2 mg one to two hours before bedtime for adults with sleep problems.<sup>19</sup> However, there  
8 are currently no clear guidelines for prescribing melatonin for children and adolescents with  
9 neurodevelopmental disorders.<sup>5 11</sup>  
10  
11  
12  
13  
14  
15  
16  
17

## 18 **How the intervention might work**

19  
20 The understanding of melatonin's underlying mechanisms has previously been extrapolated from  
21 animals to humans, but the exact physiological mechanisms of melatonin in humans remain  
22 unclear.<sup>20-22</sup> Melatonin is a neurohormone primarily secreted by the pineal gland.<sup>13</sup> Melatonin  
23 mediates dark signals, since the secretion of melatonin is related to darkness, and it is therefore  
24 associated with the circadian rhythm in humans.<sup>13 17</sup> The secretion of melatonin is regulated by the  
25 suprachiasmatic nucleus in the hypothalamus, and the production of melatonin depends on  
26 darkness, as the exposure to light inhibits secretion.<sup>11 23</sup> A decrease in the secretion of melatonin has  
27 been associated with aging and different diseases, and synthetic melatonin may theoretically reduce  
28 sleep disturbance related to melatonin deficiency.<sup>13 24</sup> Previous studies have shown that melatonin  
29 improves total sleep time, sleep onset latency, and sleep quality for adults with sleep disorders, but  
30 the effects seem small.<sup>13 25</sup> Furthermore, some studies suggest that children with autistic spectrum  
31 disorders have abnormal secretions of melatonin.<sup>6 26 27</sup> For these theoretical reasons, children with  
32 neurodevelopmental disorders may benefit from melatonin.  
33  
34  
35  
36  
37  
38  
39  
40  
41  
42  
43  
44  
45  
46  
47

## 48 **Why it is important to do this review**

49 A systematic review published in 2018 investigated the effects of melatonin for sleep problems in  
50 children with neurodevelopmental disorders.<sup>5</sup> The review concluded that melatonin was safe and  
51 effective in improving sleep for children with neurodevelopmental disorders.<sup>5</sup> Another systematic  
52 review published in 2019 investigated the effects of oral melatonin for non-respiratory sleep  
53 disturbances in children with neurodisabilities.<sup>28</sup> This review concluded that there was some  
54 evidence of beneficial effects, but the extent of these effects was unclear due to the poor quality of  
55  
56  
57  
58  
59  
60

1  
2  
3  
4 the evidence.<sup>28</sup> This review also concluded that melatonin was well-tolerated, as comparable  
5 adverse effects were found in the melatonin and placebo groups.<sup>28</sup>  
6  
7  
8

9 These previous reviews had important limitations. The conclusions were affected by a high degree  
10 of heterogeneity, high and unclear risk of bias in the included trials, and small sample sizes.<sup>5 28</sup>  
11 Furthermore, the duration of treatment was limited to a maximum of 13 weeks, and adverse events  
12 were not adequately reported or analysed in either of the reviews.<sup>5 28</sup>  
13  
14  
15  
16

17  
18 In recent studies, it has been questioned whether higher levels of melatonin are associated with  
19 delayed puberty, and other adverse effects of melatonin are also theoretically possible.<sup>29-31</sup> In 2021,  
20 a two-year follow-up of a trial investigating the treatment with melatonin in 119 children with  
21 autism spectrum disorder was published.<sup>32</sup> This trial concluded that melatonin was safe and  
22 effective for long-term treatment in children.<sup>32</sup> Other, new randomised clinical trials might have  
23 been published since the last published systematic reviews, and on-going trials have been identified  
24 on ClinicalTrials.gov.<sup>33 34</sup> These trials may contribute important information about the use of  
25 melatonin in children with neurodevelopmental disorders, including adverse effects. Therefore,  
26 there is a need for a systematic review to shed light on this important topic and to assess whether  
27 the beneficial effects outweigh any harmful effects. Our systematic review will take risks of  
28 systematic errors ('bias'), risks of random errors ('play of chance'), and the certainty of the evidence  
29 into consideration when assessing the effects of melatonin for sleep disorders in children with  
30 neurodevelopmental disorders.  
31  
32  
33  
34  
35  
36  
37  
38  
39  
40  
41  
42  
43

## 44 **Methods and analysis**

45  
46 The present protocol has been registered in the PROSPERO database (CRD42022337530) and is  
47 reported according to the guidance suggested in the Preferred Reporting Items for Systematic  
48 Reviews and Meta-Analysis Protocols (PRISMA-P) statement (please find the checklist in  
49 **supplemental material 1**).<sup>35 36</sup>  
50  
51  
52  
53  
54  
55

## 56 **Criteria for considering studies for this review**

57  
58  
59  
60



## Types of studies

We will include randomised clinical trials irrespective of trial design (including crossover trials), setting, publication status, publication year, and language. We will not include quasi-randomised trials, cluster-randomised trials, or observational studies.

## Types of participants

We will include trials randomising children and adolescents (below 18 years of age) with neurodevelopmental disorders, such as autism spectrum disorder, ADHD, cerebral palsy, epilepsy, Angelman syndrome, Down's syndrome, Fragile X syndrome, Prader-Willi syndrome, Rett syndrome, Smith-Magenis syndrome, Williams syndrome and non-specific intellectual disability. Trials will be included if the disorders of the participants are diagnosed by standardised diagnostic criteria, such as the Diagnostic and Statistical Manual of Mental Disorders<sup>37</sup> or International Classification of Diseases<sup>38</sup> or where the diagnosis or designation of neurodevelopmental disorder is made by a clinician. The participants also need to have a diagnosis of any type of sleep disorder (as defined by trialists), such as insomnia disorder, hypersomnolence disorder, narcolepsy, breathing-related sleep disorders, circadian rhythm sleep disorders, non-REM sleep arousal disorders, nightmare disorder, and REM sleep behaviour disorder.

We will include participants irrespective of sex, comorbidities, demographic factors, the stage of their condition, and the care setting. If a trial reports data where only a subset of participants is eligible (e.g. a combination of children and adults), we will only include data from those participants that fulfil the inclusion criteria, and we will therefore require subset data for the specific group to be available.

## Types of interventions

We will include trials where participants in the experimental group are given melatonin at any dose, form (e.g. tablet, capsules, gummies, liquids), duration of administration, type of administration (e.g. oral), timing of administration, and setting. We will include trials where participants receive a co-intervention (e.g. methylphenidate for participants with ADHD), providing it is delivered equally

(in any aspect, e.g. same dose, equal subset of population receiving co-intervention, etc.) in the experimental group and the control group.

## Comparators

As control intervention we will accept placebo or 'no intervention'.

## Types of outcome measures

### Primary outcomes

- 1) Total sleep time (in minutes using any type of measurement, e.g. polysomnography, actigraphy, self-report, or parent-report).
- 2) Adverse effects
  - a) The proportion of participants with one or more serious adverse events. We will use the International Conference on Harmonisation of technical requirements for registration of pharmaceuticals for human use—Good Clinical Practice (ICH-GCP) definition of a serious adverse event, which is any untoward medical occurrence that resulted in death, was life-threatening, required hospitalisation or prolonging of existing hospitalisation, resulted in persistent or significant disability or jeopardised the participant.<sup>39</sup> If the trialists do not use the ICH-GCP definition, we will include the data if the trialists use the term 'serious adverse event'. If the trialists do not use the ICH-GCP definition nor use the term serious adverse event, then we will also include the data provided the event clearly fulfils the ICH-GCP definition for a serious adverse event. We will secondly analyse each type of serious adverse event separately.
  - b) The proportion of participants with one or more non-serious adverse events (any adverse event not classified as serious). We will also analyse each type of adverse event separately.

### Secondary outcomes

- 1) Quality of life of the child (any valid continuous scale, e.g. Child Quality of Life Questionnaire).<sup>40</sup>
- 2) Quality of life of the parents/caregivers (any valid continuous scale, e.g. SF-36).<sup>41</sup>

- 1  
2  
3  
4 3) Sleep onset latency (in minutes using any type of measurement, e.g. polysomnography,  
5 actigraphy, self-report, or parent-report).  
6  
7  
8

### 9 **Exploratory outcomes**

- 10  
11 1) Quality of sleep (any valid continuous scale), such as the Pittsburgh Sleep Quality Index.<sup>42</sup>  
12  
13 2) Delayed puberty or any reports of hormonal changes.  
14  
15 3) Any continuous scale assessing adverse effects (e.g. Pediatric Adverse Event Rating Scale).<sup>43</sup>  
16  
17  
18

### 19 **Timing of outcome assessment**

20 We will include outcome data recorded at the end of the treatment period primarily and at  
21 maximum follow-up secondarily.  
22  
23  
24  
25  
26  
27

## 28 **Search methods for identification of studies**

### 29 **Electronic searches**

30 We will search the following:  
31  
32

- 33 • Cochrane Central Register of Controlled Trials (CENTRAL; current issue) in The Cochrane  
34 Library
  - 35 • MEDLINE Ovid (1946 onwards)
  - 36 • Embase Ovid (1974 onwards)
  - 37 • LILACS (Latin American and Caribbean Health Science Information database; 1982  
38 onwards)
  - 39 • Science Citation Index Expanded (Web of Science; 1964 onwards)
  - 40 • Conference Proceedings Citation Index-Science (Web of Science; 1990 onwards)
  - 41 • PsycINFO (1967 onwards)
  - 42 • ClinicalTrials.gov
  - 43 • International Clinical Trials Registry Platform (ICTRP)
- 44  
45  
46  
47  
48  
49  
50  
51  
52  
53  
54  
55

56 Please see **supplemental material 2** for the search strategy.  
57  
58  
59  
60

## Searching other resources

We will check reference lists of all included trials and any relevant systematic reviews to identify additional trials. We will also search for errata and retraction statements for the included trials. We will search websites of pharmaceutical companies (e.g. Natrol, Neurim Pharmaceuticals, Takeda Pharma), websites of U.S. Food and Drug Administration (FDA) and European Medicines Agency (EMA) to identify relevant trials. We will request FDA, EMA, and national medicines agencies to provide all publicly releasable information about relevant studies that were submitted for marketing approval, including clinical study reports. We will contact authors of eligible trials and other experts to identify any relevant trials (published or unpublished).

## Data collection and analysis

We will perform and report the review based on the recommendations in the Cochrane Handbook for Systematic Reviews of Interventions.<sup>44</sup> Analyses will be performed using Stata version 17<sup>45</sup> and Trial Sequential Analysis (TSA).<sup>46 47</sup>

## Selection of studies

Two review authors will independently screen titles and abstracts using Covidence.<sup>48</sup> We will mark articles that clearly do not meet the eligibility criteria as excludes, while potentially eligible articles will go through to the next phase. We will retrieve all relevant full-text study reports/publications, and two review authors will independently screen the full text to identify and record reasons for exclusion of the ineligible trials. The two review authors will resolve any disagreement through discussion, or, if required, they will consult with a third author (JCJ). We will illustrate the selection process of the trials in a PRISMA flow diagram.<sup>49</sup> If multiple reports are available for a single trial, all reports will be grouped under a single reference ID.

## Data extraction and management

Review authors in pairs will independently extract data from the included trials using a pilot tested data extraction form. Disagreements will be resolved through internal discussion or, if required, by discussion with a third author (JCJ). The two review authors will assess all publications of a trial

1  
2  
3  
4  
5  
6  
7  
8  
9  
10  
11  
12  
13  
14  
15  
16  
17  
18  
19  
20  
21  
22  
23  
24  
25  
26  
27  
28  
29  
30  
31  
32  
33  
34  
35  
36  
37  
38  
39  
40  
41  
42  
43  
44  
45  
46  
47  
48  
49  
50  
51  
52  
53  
54  
55  
56  
57  
58  
59  
60

together to evaluate all available data simultaneously. We will contact trial authors by email to obtain any additional data, which may not have been reported sufficiently in the publication. We will extract the following data:

- Methods: trial setting, trial location, trial design, trial duration, duration of follow-ups, date of the trial, estimation of sample size, inclusion criteria, and exclusion criteria
- Participants: number randomised, number analysed for each outcome, number lost to follow-up, age (mean and standard deviation), sex ratio, and diagnostic criteria
- Interventions: type, dose, timing, and duration of intervention
- Control: type, dose, timing, and duration of comparison
- Co-intervention: type, dose, timing, and duration of co-interventions
- Outcomes: primary, secondary, and exploratory outcomes at the reported time points
- Notes: trial funding and conflicts of interest of the trial authors

One review author will transfer the data to Stata. We will double-check the data by comparing the data presented in the review to the data extraction form.

### **Assessment of risk of bias in included studies**

Our bias risk assessment will be based on the Cochrane Risk of Bias tool—version 2 (RoB 2) as recommended in the Cochrane Handbook of Systematic Reviews of Interventions.<sup>44</sup> We will evaluate the methodology in respect of the following bias domains:

- Bias arising from the randomisation process
- Bias due to deviations from the intended interventions (effect of assignment to intervention).
- Bias due to missing outcome data
- Bias in measurement of the outcome
- Bias in selection of the reported result

Review authors in pairs will independently assess the risk of bias using a template (available at <https://www.riskofbias.info/>). Disagreements will be resolved through internal discussion or, if required, by discussion with a third author (JCJ). We will use the signalling questions in the RoB 2 tool to rate each domain at either 'low risk of bias', 'some concerns', or 'high risk of bias'. We will assess all domains of risk of bias for each outcome in each trial. The overall risk of bias of a result

1  
2  
3  
4 will be judged to be low if all domains are assessed at low risk of bias. If one or more domains are  
5 assessed at either some concerns or high risk of bias, the overall risk of bias will be assessed at  
6 high. We will assess the risk of bias for the outcomes of the included trials presented in the  
7 'Summary of findings' table (primary and secondary outcomes at end of treatment). The risk of bias  
8 assessments will be illustrated in a table (using <https://www.riskofbias.info/>), and the assessments  
9 will be used to conduct subgroup analyses. The risk of bias assessment will also be used to inform  
10 GRADE and the 'Summary of findings' table. For trials using crossover design, only data from the  
11 first period will be assessed.  
12  
13  
14  
15  
16  
17  
18  
19  
20

## 21 **Measures of treatment effect**

### 22 **Continuous outcomes**

23 We will calculate mean differences (MDs) and consider calculating standardised mean differences  
24 (SMD) with 95% CIs for continuous outcomes. We will enter data presented as a scale with a  
25 consistent direction of effect. We will primarily analyse scores assessed at single time points. If  
26 only changes from baseline scores are reported, we will analyse the results together with follow-up  
27 scores for MD (not for SMD).<sup>44</sup> If standard deviations (SDs) are not reported, we will calculate the  
28 SDs using trial data, if possible, or request such data from the authors.  
29  
30  
31  
32  
33  
34  
35  
36

### 37 **Dichotomous outcomes**

38 We will calculate risk ratios (RRs) with 95% confidence intervals (CI) for dichotomous outcomes.  
39  
40  
41  
42  
43

### 44 **Unit of analysis issues**

45 We will only include randomised clinical trials. Trials using a crossover design will be treated as  
46 parallel trials, since only data from the first period will be included.<sup>44</sup> Where multiple trial arms are  
47 reported in a single trial, we will include only the relevant arms. For trials with multiple relevant  
48 experimental or control groups, we will combine the groups as appropriate.<sup>44</sup>  
49  
50  
51  
52  
53

54 If, during the selection of trials, we identify observational studies (i.e. quasi-randomised studies,  
55 cohort studies, or patient reports) that report adverse events associated with melatonin, we will  
56 review these studies for report on adverse events. We will not specifically search for observational  
57  
58  
59  
60

1  
2  
3  
4 studies for inclusion in this review, which is a limitation in our review. We will not analyse the  
5 extracted data on harms from non-randomised clinical studies together with the data on harms from  
6 the randomised clinical trials included in the review; neither will we assess the bias risk in these  
7 studies. However, we will refer to the extracted narrative data on harm with a link to a table in an  
8 appendix. We are aware that the decision not to search for all observational studies might bias our  
9 review towards assessment of benefits and might overlook certain harms such as late or rare harms.  
10 If we demonstrate benefits from the use of melatonin in children and adolescents with  
11 neurodevelopmental disorders, then a systematic review of harms in observational studies ought to  
12 be launched.<sup>50</sup>  
13  
14  
15  
16  
17  
18  
19  
20  
21  
22

### 23 **Dealing with missing data**

24 We will, as the first option, contact all trial authors to obtain information on missing data (i.e. for  
25 data extraction and for assessment of risk of bias, as specified above). We will use intention-to-treat  
26 data if provided by the trialists.<sup>51</sup>  
27  
28  
29  
30  
31

### 32 **Dichotomous outcomes**

33 We will not impute missing values for any outcomes in our primary analysis. In our sensitivity  
34 analyses (see below), we will impute data.  
35  
36  
37  
38  
39

### 40 **Continuous outcomes**

41 We will not impute missing values for any outcomes in our primary analysis. In our sensitivity  
42 analysis (see below) for continuous outcomes, we will impute data.  
43  
44  
45  
46  
47

### 48 **Assessment of heterogeneity**

49 We will investigate forest plots to visually assess for signs of heterogeneity. We will also estimate  
50 the presence of statistical heterogeneity by a chi<sup>2</sup> test (threshold P < 0.05) and measure the  
51 quantities of heterogeneity by the I<sup>2</sup> statistic.<sup>52 53</sup> We will investigate possible heterogeneity through  
52 subgroup analyses. We may ultimately decide that a meta-analysis should be avoided.<sup>44</sup> We will  
53 interpret I<sup>2</sup> heterogeneity as suggested by the Cochrane Handbook for Systematic Reviews of  
54 Interventions.<sup>44</sup> If we identify substantial heterogeneity (I<sup>2</sup> > 50%), we will report it, and explore the  
55  
56  
57  
58  
59  
60

possible causes by prespecified subgroup analyses. We will carefully investigate trial characteristics and report if we find unexpected heterogeneity due to clinical or methodological factors. Ultimately it will be decided if meta-analysis should be avoided.

### Assessment of reporting biases

We will use funnel plots to assess reporting bias if ten or more trials are included in an outcome.<sup>44</sup> We will visually inspect funnel plots to assess the risk of small trial effects that could potentially reflect publication bias. We are aware of the limitations of a funnel plot (i.e. a funnel plot assesses bias due to small sample size). From this information, we will assess possible risk of publication bias. For dichotomous outcomes, we will test asymmetry with the Harbord test<sup>54</sup> if  $\tau^2$  is less than 0.1 and with the R ucker test if  $\tau^2$  is more than 0.1. For continuous outcomes, we will use the regression asymmetry test<sup>55</sup> and the adjusted rank correlation.<sup>56</sup>

### Data synthesis

#### Meta-analysis

We will undertake this meta-analysis according to the recommendations stated in the Cochrane Handbook for Systematic Reviews of Interventions,<sup>44</sup> Keus et al.,<sup>57</sup> and our eight-step procedure suggested by Jakobsen et al.<sup>58</sup> We will assess our intervention effects with both random-effects meta-analyses (Hartung-Knapp-Sidik-Jonkman)<sup>59</sup> and fixed-effect meta-analyses (Mantel-Haenszel for dichotomous outcomes and inverse variance for continuous outcomes),<sup>44 60</sup> and report both meta-analysis results.<sup>58</sup> We will primarily report the most conservative result (widest confidence interval and highest P value), and report the less conservative result as a sensitivity analysis.<sup>58</sup> As two primary outcomes are specified, we will consider a P value of 0.025 or less as the threshold for statistical significance for all outcomes.<sup>58</sup> Our primary analyses will include all trials. Where data are only available from one trial, we will use Fisher's exact test for dichotomous data and Student's t-test for continuous data.<sup>61 62</sup>

#### Trial Sequential Analysis

Traditional meta-analysis runs the risk of random errors due to sparse data and repetitive testing of accumulating data when updating reviews. We wish to control for the risks of type I and type II



1  
2  
3  
4 errors. We will therefore perform Trial Sequential Analysis on all outcomes, in order to calculate  
5 the required information size (i.e. the number of participants needed in a meta-analysis to detect or  
6 reject a certain intervention effect) and the cumulative Z-curve's breach of relevant trial sequential  
7 monitoring boundaries.<sup>47 63-68</sup> A more detailed description of Trial Sequential Analysis can be found  
8 in the manual<sup>47</sup> and at [www.ctu.dk/tsa/](http://www.ctu.dk/tsa/). For dichotomous outcomes, we will estimate the required  
9 information size based on the observed proportion of patients with an outcome in the control group  
10 (the cumulative proportion of patients with an event in the control groups relative to all patients in  
11 the control groups), a relative risk reduction or a relative risk increase of 25%, an alpha of 2.5% for  
12 all our outcomes, a beta of 10%, and the observed diversity as suggested by the trials in the meta-  
13 analysis. For continuous outcomes, we will use the observed standard deviation (SD) in the control  
14 group, a mean difference of 30 minutes when assessing total sleep time; otherwise, a mean  
15 difference of the observed SD/2, an alpha of 2.5% for all outcomes, a beta of 10%, and the observed  
16 diversity of the trials in the meta-analysis. We will only use the diversity-adjusted required  
17 information size for random-effects Trial Sequential Analyses.  
18  
19  
20  
21  
22  
23  
24  
25  
26  
27  
28  
29  
30

### 31 **Subgroup analysis and investigation of heterogeneity**

32 We will perform the following subgroup analyses on the primary outcomes:  
33

- 34 1. Type of neurodevelopmental disorder: this subgroup analysis will assess whether the effects  
35 of melatonin are different depending on the neurodevelopmental disorder of the child.  
36
- 37 2. Age (below 12 years compared to above 12 years and preschool-age children compared to  
38 school-age children (as defined by trialists)): this will assess whether the effects of  
39 melatonin vary depending on the age of the participants.  
40
- 41 3. Type of comparator (placebo or no intervention): this subgroup analysis will assess whether  
42 the effects of melatonin vary depending on the comparator.  
43
- 44 4. Timing of the melatonin administration. If data are available, we will use the following  
45 comparisons: < 2 hours before bedtime, 2-4 hours before bedtime, or 4-8 hours before  
46 bedtime. If not, we will use definitions by trialists. This subgroup analysis is relevant,  
47 because the timing of administration may affect the outcomes.<sup>69-71</sup>  
48
- 49 5. Type of sleep disorder: this subgroup analysis will assess whether the effects of melatonin  
50 vary depending on the type of sleep disorder.  
51  
52  
53  
54  
55  
56  
57  
58  
59  
60

6. Trials at high risk of bias compared to trials at low risk of bias: this subgroup analysis will assess whether the effects of melatonin vary depending on the risk of bias of the included trials.
7. Duration of trials: this subgroup analysis will assess whether the effects of melatonin vary depending on the duration of the included trials.

Post-hoc subgroup analyses might be warranted if unexpected clinical or statistical heterogeneity is identified during the analysis of the review results.<sup>58</sup> We will disclose any new subgroup analyses not reported in this protocol in the 'Differences between protocol and review' section of the systematic review.

### **Sensitivity analysis**

To assess the potential impact of the missing data, we will perform the two following sensitivity analyses on the primary outcomes:

'Best-worst-case' scenario: we will assume that all participants lost to follow-up in the experimental group had beneficial outcomes (no serious adverse events/improved quality of sleep defined as the group mean plus two SDs).<sup>58</sup> We will accordingly assume that all participants lost to follow-up in the control group had poor outcomes (serious adverse events/deteriorated quality of sleep defined as the group mean plus two SDs).<sup>58</sup>

'Worst-best-case' scenario: we will assume that all participants lost to follow-up in the experimental group had poor outcomes (serious adverse events/deteriorated quality of sleep defined as the group mean plus two SDs).<sup>58</sup> We will accordingly assume that all participants lost to follow-up in the control group had beneficial outcomes (no serious adverse events/improved quality of sleep defined as the group mean plus two SDs).<sup>58</sup>

We will present the results of both scenarios in our review.

We will assess the potential impact of missing SDs for quality of sleep as follows: when SDs are missing, and it is not possible to calculate them, we will impute SDs from trials with similar

1  
2  
3  
4 populations and low risk of bias. If we find no such trials, we will impute SDs from trials with a  
5 similar population. As the final option, we will impute SDs from all trials. We will present results  
6 of this scenario in our review.  
7  
8  
9

## 10 11 12 **Summary of findings and assessment of the certainty of the evidence**

13  
14 Review authors in pairs will use GRADE to assess the certainty of the body of evidence associated  
15 with each of the primary and secondary outcomes at end of treatment in our review. We will  
16 construct 'Summary of findings' tables using the GRADEpro GDT.<sup>72</sup> The GRADE approach  
17 appraises the certainty of a body of evidence based on the extent to which one can be confident that  
18 an estimate of effect or association reflects the item being assessed. We will assess the GRADE  
19 levels of evidence as either high, moderate, low, or very low certainty on the following quality  
20 measures: risk of bias (the overall risk of bias will be used for each outcome), directness of the  
21 evidence, heterogeneity of the data, precision of effect estimates (assessed by TSA), and risk of  
22 publication bias.<sup>72</sup> We will downgrade the evidence by one or two levels due to serious or very  
23 serious issues. We will downgrade imprecision in GRADE by two levels if the accrued number of  
24 participants is below 50% of the DARIS, and one level if between 50 and 100% of DARIS. We will  
25 not downgrade if the cumulative Z-curve crosses the monitoring boundaries for benefit, harm, or  
26 futility, or DARIS is reached. Two review authors will assess the certainty of evidence  
27 independently and decide on downgrading. If no agreement can be reached, a third review author  
28 (JCJ) will resolve the discussion. We will justify all decisions to downgrade the certainty of  
29 evidence using footnotes, and we will make comments to aid the reader's understanding of the  
30 review where necessary. The 'Summary of findings' table will also report the anticipated absolute  
31 effects, relative effects, number of participants, type of participants, and setting.  
32  
33  
34  
35  
36  
37  
38  
39  
40  
41  
42  
43  
44  
45  
46  
47  
48

## 49 **Patient and public involvement**

50  
51 No patient involved.  
52  
53  
54  
55

## 56 **Ethics and dissemination**

57  
58  
59  
60

Ethical approval was not required for this protocol and systematic review. The results of the systematic review will be published in a peer-reviewed journal to help inform future research and clinical practice.

## Acknowledgements

We thank Sarah Louise Klingenberg (Information Specialist, The Cochrane Hepato-Biliary Group, Copenhagen Trial Unit, Centre for Clinical Intervention Research, Copenhagen University Hospital - Rigshospitalet, Denmark) for the help with developing the search strategy.

## Contributors

CKJ, RH, SJ, PF, MH, JM, CG, and JCJ contributed to the conceptualisation and design of the study. CKJ and JCJ wrote the original draft. All authors commented and approved the final manuscript. JCJ is the guarantor of the review.

## Funding

This research received no specific grant from any funding agency in the public, commercial or not-for-profit sectors.

## Competing interests

None declared.

## References

1. United States Environmental Protection Agency. Neurodevelopmental Disorders 2015 [Available from: [https://www.epa.gov/sites/default/files/2015-10/documents/ace3\\_neurodevelopmental.pdf](https://www.epa.gov/sites/default/files/2015-10/documents/ace3_neurodevelopmental.pdf) accessed 16 September 2021.
2. Morris-Rosendahl DJ, Crocq MA. Neurodevelopmental disorders-the history and future of a diagnostic concept. *Dialogues Clin Neurosci* 2020;22(1):65-72. doi: 10.31887/DCNS.2020.22.1/macroq [published Online First: 2020/07/24]
3. Morris C, Simkiss D, Busk M, et al. Setting research priorities to improve the health of children and young people with neurodisability: a British Academy of Childhood Disability-James Lind Alliance Research Priority Setting Partnership. *BMJ Open* 2015;5(1):e006233. doi: 10.1136/bmjopen-2014-006233 [published Online First: 2015/01/30]

1  
2  
3  
4  
5  
6  
7  
8  
9  
10  
11  
12  
13  
14  
15  
16  
17  
18  
19  
20  
21  
22  
23  
24  
25  
26  
27  
28  
29  
30  
31  
32  
33  
34  
35  
36  
37  
38  
39  
40  
41  
42  
43  
44  
45  
46  
47  
48  
49  
50  
51  
52  
53  
54  
55  
56  
57  
58  
59  
60

4. Robinson-Shelton A, Malow BA. Sleep disturbances in neurodevelopmental disorders. *Curr Psychiatry Rep* 2016;18(1):6. doi: 10.1007/s11920-015-0638-1 [published Online First: 2016/01/01]
5. Abdelgadir IS, Gordon MA, Akobeng AK. Melatonin for the management of sleep problems in children with neurodevelopmental disorders: a systematic review and meta-analysis. *Arch Dis Child* 2018;103(12):1155-62. doi: 10.1136/archdischild-2017-314181 [published Online First: 2018/05/04]
6. Gringras P, Nir T, Breddy J, et al. Efficacy and safety of pediatric prolonged-release melatonin for insomnia in children with autism spectrum disorder. *J Am Acad Child Adolesc Psychiatry* 2017;56(11):948-57 e4. doi: 10.1016/j.jaac.2017.09.414 [published Online First: 2017/11/04]
7. Hollway JA, Aman MG. Pharmacological treatment of sleep disturbance in developmental disabilities: a review of the literature. *Res Dev Disabil* 2011;32(3):939-62. doi: 10.1016/j.ridd.2010.12.035 [published Online First: 2011/02/08]
8. Johnson CR. Sleep problems in children with mental retardation and autism. *Child Adolesc Psychiatr Clin N Am* 1996;5(3):673-84. doi: 10.1016/s1056-4993(18)30355-9
9. Gringras P, Gamble C, Jones AP, et al. Melatonin for sleep problems in children with neurodevelopmental disorders: randomised double masked placebo controlled trial. *BMJ* 2012;345:e6664. doi: 10.1136/bmj.e6664 [published Online First: 2012/11/07]
10. Devnani PA, Hegde AU. Autism and sleep disorders. *J Pediatr Neurosci* 2015;10(4):304-7. doi: 10.4103/1817-1745.174438 [published Online First: 2016/03/11]
11. Esposito S, Laino D, D'Alonzo R, et al. Pediatric sleep disturbances and treatment with melatonin. *J Transl Med* 2019;17(1):77. doi: 10.1186/s12967-019-1835-1 [published Online First: 2019/03/16]
12. Wang SY, Shi XC, Laborda P. Indole-based melatonin analogues: synthetic approaches and biological activity. *Eur J Med Chem* 2020;185:111847. doi: 10.1016/j.ejmech.2019.111847 [published Online First: 2019/11/16]
13. Xie Z, Chen F, Li WA, et al. A review of sleep disorders and melatonin. *Neurol Res* 2017;39(6):559-65. doi: 10.1080/01616412.2017.1315864 [published Online First: 2017/05/04]
14. Boafo A, Greenham S, Sullivan M, et al. Medications for sleep disturbance in children and adolescents with depression: a survey of Canadian child and adolescent psychiatrists. *Child Adolesc Psychiatry Ment Health* 2020;14:10. doi: 10.1186/s13034-020-00316-8 [published Online First: 2020/03/17]
15. Kimland EE, Bardage C, Collin J, et al. Pediatric use of prescribed melatonin in Sweden 2006-2017: a register based study. *Eur Child Adolesc Psychiatry* 2021;30(9):1339-50. doi: 10.1007/s00787-020-01598-1 [published Online First: 2020/07/24]
16. Owens JA, Rosen CL, Mindell JA, et al. Use of pharmacotherapy for insomnia in child psychiatry practice: A national survey. *Sleep Med* 2010;11(7):692-700. doi: 10.1016/j.sleep.2009.11.015 [published Online First: 2010/07/14]
17. Rzepka-Migut B, Paprocka J. Efficacy and safety of melatonin treatment in children with autism spectrum disorder and attention-deficit/hyperactivity disorder - a review of the literature. *Brain Sci* 2020;10(4) doi: 10.3390/brainsci10040219 [published Online First: 2020/04/11]
18. Schwichtenberg AJ, Malow BA. Melatonin treatment in children with developmental disabilities. *Sleep Med Clin* 2015;10(2):181-7. doi: 10.1016/j.jsmc.2015.02.008 [published Online First: 2015/06/10]
19. National Health Service. Melatonin for sleep problems. 2019

20. Cipolla-Neto J, Amaral FGD. Melatonin as a hormone: new physiological and clinical insights. *Endocr Rev* 2018;39(6):990-1028. doi: 10.1210/er.2018-00084 [published Online First: 2018/09/15]
21. Pévet P. Melatonin in animal models. *Dialogues Clin Neurosci* 2004;5(4):343-52. doi: 10.31887/DCNS.2003.5.4/ppevet
22. Tosini G, Owino S, Guillaume JL, et al. Understanding melatonin receptor pharmacology: latest insights from mouse models, and their relevance to human disease. *Bioessays* 2014;36(8):778-87. doi: 10.1002/bies.201400017 [published Online First: 2014/06/07]
23. Janjua I, Goldman RD. Sleep-related melatonin use in healthy children. *Can Fam Physician* 2016;62(4):315-16.
24. Karasek M. Melatonin, human aging, and age-related diseases. *Exp Gerontol* 2004;39(11-12):1723-9. doi: 10.1016/j.exger.2004.04.012 [published Online First: 2004/12/08]
25. Ferracioli-Oda E, Qawasmi A, Bloch MH. Meta-analysis: melatonin for the treatment of primary sleep disorders. *PLoS One* 2013;8(5):e63773. doi: 10.1371/journal.pone.0063773 [published Online First: 2013/05/17]
26. Rossignol DA, Frye RE. Melatonin in autism spectrum disorders: a systematic review and meta-analysis. *Dev Med Child Neurol* 2011;53(9):783-92. doi: 10.1111/j.1469-8749.2011.03980.x [published Online First: 2011/04/27]
27. Tordjman S, Anderson GM, Pichard N, et al. Nocturnal excretion of 6-sulphatoxymelatonin in children and adolescents with autistic disorder. *Biol Psychiatry* 2005;57(2):134-8. doi: 10.1016/j.biopsych.2004.11.003 [published Online First: 2005/01/18]
28. Parker A, Beresford B, Dawson V, et al. Oral melatonin for non-respiratory sleep disturbance in children with neurodisabilities: systematic review and meta-analyses. *Dev Med Child Neurol* 2019;61(8):880-90. doi: 10.1111/dmcn.14157 [published Online First: 2019/02/03]
29. Boaf A, Greenham S, Alenezi S, et al. Could long-term administration of melatonin to prepubertal children affect timing of puberty? A clinician's perspective. *Nat Sci Sleep* 2019;11:1-10. doi: 10.2147/NSS.S181365 [published Online First: 2019/02/19]
30. Kennaway DJ. Potential safety issues in the use of the hormone melatonin in paediatrics. *J Paediatr Child Health* 2015;51(6):584-9. doi: 10.1111/jpc.12840 [published Online First: 2015/02/04]
31. Abdallah N, Attia A, Montaser B. Role of melatonin in constitutional delayed puberty in boys. *Menoufia Med J* 2020;33(1) doi: 10.4103/mmj.mmj\_300\_18
32. Malow BA, Findling RL, Schroder CM, et al. Sleep, Growth, and Puberty After 2 Years of Prolonged-Release Melatonin in Children With Autism Spectrum Disorder. *J Am Acad Child Adolesc Psychiatry* 2021;60(2):252-61 e3. doi: 10.1016/j.jaac.2019.12.007 [published Online First: 2020/01/27]
33. ClinicalTrials.gov. Does melatonin restore sleep architecture in autistic children (SOMELIA) 2019 [Available from: <https://clinicaltrials.gov/ct2/show/study/NCT01993251> accessed 20 September 2021.
34. ClinicalTrials.gov. Treatment of sleep disturbance in children with ASD 2021 [Available from: <https://clinicaltrials.gov/ct2/show/NCT04878198> accessed 20 September 2021.
35. Moher D, Shamseer L, Clarke M, et al. Preferred reporting items for systematic review and meta-analysis protocols (PRISMA-P) 2015 statement. *Syst Rev* 2015;4(1):1.
36. Shamseer L, Moher D, Clarke M, et al. Preferred reporting items for systematic review and meta-analysis protocols (PRISMA-P) 2015: elaboration and explanation. *BMJ* 2015;349:7647.
37. American Psychiatric Association. Diagnostic and statistical manual of mental disorders (DSM-5®). Washington DC: American Psychiatric Publishing 2013.



- 1
  - 2
  - 3
  - 4
  - 5
  - 6
  - 7
  - 8
  - 9
  - 10
  - 11
  - 12
  - 13
  - 14
  - 15
  - 16
  - 17
  - 18
  - 19
  - 20
  - 21
  - 22
  - 23
  - 24
  - 25
  - 26
  - 27
  - 28
  - 29
  - 30
  - 31
  - 32
  - 33
  - 34
  - 35
  - 36
  - 37
  - 38
  - 39
  - 40
  - 41
  - 42
  - 43
  - 44
  - 45
  - 46
  - 47
  - 48
  - 49
  - 50
  - 51
  - 52
  - 53
  - 54
  - 55
  - 56
  - 57
  - 58
  - 59
  - 60
38. World Health Organization. International Statistical Classification of Diseases and Related Health Problems (ICD) 2021 [Available from: <https://www.who.int/standards/classifications/classification-of-diseases> accessed 16 September 2021].
39. (International Conference on Harmonisation of Technical Requirements for Registration of Pharmaceuticals for Human Use). ICH harmonised guideline: integrated addendum to ICH E6(R1): guideline for good clinical practice (ICH-GCP). 2015; Step 2 version. <https://ichgcp.net/da> (accessed 1 September, 2021).
40. Graham P, Stevenson J, Flynn D. A new measure of health-related quality of life for children: Preliminary findings. *Psychology & Health* 1997;12(5):655-65. doi: 10.1080/08870449708407412
41. Ware J, Sherbourne C. The MOS 36-item short-form health survey (SF-36). I. Conceptual framework and item selection. *Med Care* 1992;30(6):473-83.
42. Buysse DJ, Reynolds CF, Monk TH, et al. The Pittsburgh sleep quality index: A new instrument for psychiatric practice and research. *Psychiatry Res* 1989;28(2):193-213. doi: 10.1016/0165-1781(89)90047-4
43. Wehmeier PM, Schacht A, Lehmann M, et al. Emotional well-being in children and adolescents treated with atomoxetine for attention-deficit/hyperactivity disorder: findings from a patient, parent and physician perspective using items from the pediatric adverse event rating scale (PAERS). *Child Adolesc Psychiatry Ment Health* 2008;2(1):11. doi: 10.1186/1753-2000-2-11 [published Online First: 20080528]
44. Higgins J, Thomas J, Chandler J, et al. Cochrane Handbook for Systematic Reviews of Interventions: Cochrane, 2022, 2022.
45. StataCorp. Stata Statistical Software: Release 17 College Station, TX: StataCorp LLC; 2022 [cited 2020 Sep 1]. accessed 1 May 2022.
46. Copenhagen Trial Unit. TSA - Trial Sequential Analysis [Web page]. [Available from: <http://www.ctu.dk/tsa/> accessed 1 May 2022.
47. Thorlund K, Engstrøm J, Wetterslev J, et al. User manual for trial sequential analysis (TSA). Copenhagen, Denmark: Copenhagen Trial Unit, Centre for Clinical Intervention Research, 2011:1-115.
48. Covidence systematic review software VHI, Melbourne, Australia. Available at [www.covidence.org](http://www.covidence.org).
49. Page MJ, McKenzie JE, Bossuyt PM, et al. The PRISMA 2020 statement: an updated guideline for reporting systematic reviews. *BMJ* 2021;372:n71. doi: 10.1136/bmj.n71 [published Online First: 2021/03/31]
50. Storebo OJ, Pedersen N, Ramstad E, et al. Methylphenidate for attention deficit hyperactivity disorder (ADHD) in children and adolescents - assessment of adverse events in non-randomised studies. *Cochrane Database Syst Rev* 2018;5:CD012069. doi: 10.1002/14651858.CD012069.pub2 [published Online First: 20180509]
51. Jakobsen JC, Gluud C, Wetterslev J, et al. When and how should multiple imputation be used for handling missing data in randomised clinical trials—a practical guide with flowcharts. *BMC Med Res Methodol* 2017;17(1):162.
52. Higgins JP, Thompson SG. Quantifying heterogeneity in a meta-analysis. *Stat Med* 2002;21(11):1539-58.
53. Higgins JP, Thompson SG, Deeks JJ, et al. Measuring inconsistency in meta-analyses. *BMJ* 2003;327(7414):557.
54. Harbord RM, Egger M, Sterne JA. A modified test for small-study effects in meta-analyses of controlled trials with binary endpoints. *Stat Med* 2006;25(20):3443-57.

- 1  
2  
3  
4 55. Egger M, Smith GD, Schneider M, et al. Bias in meta-analysis detected by a simple, graphical  
5 test. *BMJ* 1997;315(7109):629-34.
- 6 56. Begg CB, Mazumdar M. Operating characteristics of a rank correlation test for publication bias.  
7 *Biometrics* 1994:1088-101.
- 8 57. Keus F, Wetterslev J, Gluud C, et al. Evidence at a glance: error matrix approach for  
9 overiewing available evidence. *BMC Med Res Methodol* 2010;10(1):90.
- 10 58. Jakobsen JC, Wetterslev J, Winkel P, et al. Thresholds for statistical and clinical significance in  
11 systematic reviews with meta-analytic methods. *BMC Med Res Methodol* 2014;14(1):120.
- 12 59. IntHout J, Ioannidis JPA, Borm GF. The Hartung-Knapp-Sidik-Jonkman method for random  
13 effects meta-analysis is straightforward and considerably outperforms the standard  
14 DerSimonian-Laird method. *BMC Med Res Methodol* 2014;14(1):25. doi: 10.1186/1471-  
15 2288-14-25
- 16 60. DeMets DL. Methods for combining randomized clinical trials: strengths and limitations. *Stat*  
17 *Med* 1987;6(3):341-48.
- 18 61. Fisher RA. On the interpretation of  $\chi^2$  from contingency tables, and the calculation of p. *J R*  
19 *Stat Soc* 1922;85(1) doi: 10.2307/2340521
- 20 62. Student. The probable error of a mean. *Biometrika* 1908;6(1) doi: 10.2307/2331554
- 21 63. Brok J, Thorlund K, Gluud C, et al. Trial sequential analysis reveals insufficient information  
22 size and potentially false positive results in many meta-analyses. *J Clin Epidemiol*  
23 2008;61(8):763-69.
- 24 64. Brok J, Thorlund K, Wetterslev J, et al. Apparently conclusive meta-analyses may be  
25 inconclusive—trial sequential analysis adjustment of random error risk due to repetitive  
26 testing of accumulating data in apparently conclusive neonatal meta-analyses. *Int J*  
27 *Epidemiol* 2008;38(1):287-98.
- 28 65. Copenhagen Trial Unit. Trial Sequential Analysis 2022 [Available from: <https://ctu.dk/tsa/>].
- 29 66. Imberger G, Thorlund K, Gluud C, et al. False-positive findings in Cochrane meta-analyses with  
30 and without application of trial sequential analysis: an empirical review. *BMJ Open*  
31 2016;6(8):e011890.
- 32 67. Thorlund K, Devereaux P, Wetterslev J, et al. Can trial sequential monitoring boundaries reduce  
33 spurious inferences from meta-analyses? *Int J Epidemiol* 2008;38(1):276-86.
- 34 68. Wetterslev J, Thorlund K, Brok J, et al. Trial sequential analysis may establish when firm  
35 evidence is reached in cumulative meta-analysis. *J Clin Epidemiol* 2008;61(1):64-75.
- 36 69. Arendt J, Skene DJ. Melatonin as a chronobiotic. *Sleep Med Rev* 2005;9(1):25-39. doi:  
37 10.1016/j.smrv.2004.05.002
- 38 70. Khullar A. The role of melatonin in the circadian rhythm sleep-wake cycle. *Psychiatr Times*  
39 2012;29(7):26.
- 40 71. Munday K, Benloucif S, Harsanyi K, et al. Phase-dependent treatment of delayed sleep phase  
41 syndrome with melatonin. *Sleep* 2005;28(10):1271-78. doi: 10.1093/sleep/28.10.1271
- 42 72. Guyatt GH, Oxman AD, Vist GE, et al. GRADE: an emerging consensus on rating quality of  
43 evidence and strength of recommendations. *BMJ* 2008;336(7650):924-6. doi:  
44 10.1136/bmj.39489.470347.AD
- 45  
46  
47  
48  
49  
50  
51  
52  
53  
54  
55  
56  
57  
58  
59  
60



**PRISMA-P (Preferred Reporting Items for Systematic review and Meta-Analysis Protocols) 2015 checklist: recommended items to address in a systematic review protocol\***

| Section and topic                 | Item No | Checklist item                                                                                                                                                                                                                | Page number              |
|-----------------------------------|---------|-------------------------------------------------------------------------------------------------------------------------------------------------------------------------------------------------------------------------------|--------------------------|
| <b>ADMINISTRATIVE INFORMATION</b> |         |                                                                                                                                                                                                                               |                          |
| Title:                            |         |                                                                                                                                                                                                                               |                          |
| Identification                    | 1a      | Identify the report as a protocol of a systematic review                                                                                                                                                                      | 1                        |
| Update                            | 1b      | If the protocol is for an update of a previous systematic review, identify as such                                                                                                                                            | N/A                      |
| Registration                      | 2       | If registered, provide the name of the registry (such as PROSPERO) and registration number                                                                                                                                    | 2                        |
| Authors:                          |         |                                                                                                                                                                                                                               |                          |
| Contact                           | 3a      | Provide name, institutional affiliation, e-mail address of all protocol authors; provide physical mailing address of corresponding author                                                                                     | 1                        |
| Contributions                     | 3b      | Describe contributions of protocol authors and identify the guarantor of the review                                                                                                                                           | 22                       |
| Amendments                        | 4       | If the protocol represents an amendment of a previously completed or published protocol, identify as such and list changes; otherwise, state plan for documenting important protocol amendments                               | 16                       |
| Support:                          |         |                                                                                                                                                                                                                               |                          |
| Sources                           | 5a      | Indicate sources of financial or other support for the review                                                                                                                                                                 | 22                       |
| Sponsor                           | 5b      | Provide name for the review funder and/or sponsor                                                                                                                                                                             | 22                       |
| Role of sponsor or funder         | 5c      | Describe roles of funder(s), sponsor(s), and/or institution(s), if any, in developing the protocol                                                                                                                            | N/A                      |
| <b>INTRODUCTION</b>               |         |                                                                                                                                                                                                                               |                          |
| Rationale                         | 6       | Describe the rationale for the review in the context of what is already known                                                                                                                                                 | 5                        |
| Objectives                        | 7       | Provide an explicit statement of the question(s) the review will address with reference to participants, interventions, comparators, and outcomes (PICO)                                                                      | 6                        |
| <b>METHODS</b>                    |         |                                                                                                                                                                                                                               |                          |
| Eligibility criteria              | 8       | Specify the study characteristics (such as PICO, study design, setting, time frame) and report characteristics (such as years considered, language, publication status) to be used as criteria for eligibility for the review | 7-8                      |
| Information sources               | 9       | Describe all intended information sources (such as electronic databases, contact with study authors, trial registers or other grey literature sources) with planned dates of coverage                                         | 9-10                     |
| Search strategy                   | 10      | Present draft of search strategy to be used for at least one electronic database, including planned limits, such that it could be repeated                                                                                    | Supplementary material 2 |

|                                    |     |                                                                                                                                                                                                                                                  |       |
|------------------------------------|-----|--------------------------------------------------------------------------------------------------------------------------------------------------------------------------------------------------------------------------------------------------|-------|
| Study records:                     |     |                                                                                                                                                                                                                                                  |       |
| Data management                    | 11a | Describe the mechanism(s) that will be used to manage records and data throughout the review                                                                                                                                                     | 10    |
| Selection process                  | 11b | State the process that will be used for selecting studies (such as two independent reviewers) through each phase of the review (that is, screening, eligibility and inclusion in meta-analysis)                                                  | 10    |
| Data collection process            | 11c | Describe planned method of extracting data from reports (such as piloting forms, done independently, in duplicate), any processes for obtaining and confirming data from investigators                                                           | 10-11 |
| Data items                         | 12  | List and define all variables for which data will be sought (such as PICO items, funding sources), any pre-planned data assumptions and simplifications                                                                                          | 10-11 |
| Outcomes and prioritization        | 13  | List and define all outcomes for which data will be sought, including prioritization of main and additional outcomes, with rationale                                                                                                             | 8-9   |
| Risk of bias in individual studies | 14  | Describe anticipated methods for assessing risk of bias of individual studies, including whether this will be done at the outcome or study level, or both; state how this information will be used in data synthesis                             | 11-12 |
| Data synthesis                     | 15a | Describe criteria under which study data will be quantitatively synthesised                                                                                                                                                                      | 12-15 |
|                                    | 15b | If data are appropriate for quantitative synthesis, describe planned summary measures, methods of handling data and methods of combining data from studies, including any planned exploration of consistency (such as $I^2$ , Kendall's $\tau$ ) | 12-15 |
|                                    | 15c | Describe any proposed additional analyses (such as sensitivity or subgroup analyses, meta-regression)                                                                                                                                            | 15-17 |
|                                    | 15d | If quantitative synthesis is not appropriate, describe the type of summary planned                                                                                                                                                               | 12-13 |
| Meta-bias(es)                      | 16  | Specify any planned assessment of meta-bias(es) (such as publication bias across studies, selective reporting within studies)                                                                                                                    | 14    |
| Confidence in cumulative evidence  | 17  | Describe how the strength of the body of evidence will be assessed (such as GRADE)                                                                                                                                                               | 17    |

**\* It is strongly recommended that this checklist be read in conjunction with the PRISMA-P Explanation and Elaboration (cite when available) for important clarification on the items. Amendments to a review protocol should be tracked and dated. The copyright for PRISMA-P (including checklist) is held by the PRISMA-P Group and is distributed under a Creative Commons Attribution Licence 4.0.**

*From: Shamseer L, Moher D, Clarke M, Ghersi D, Liberati A, Petticrew M, Shekelle P, Stewart L, PRISMA-P Group. Preferred reporting items for systematic review and meta-analysis protocols (PRISMA-P) 2015: elaboration and explanation. BMJ. 2015 Jan 2;349(jan02 1):g7647.*

**Search strategies for  
Melatonin for neurodevelopmental disorders and non-respiratory sleep disorders  
Preliminary searches prepared 3 June 2022**

**Cochrane Central Register of Controlled Trials (latest issue) in the Cochrane Library**

- #1 MeSH descriptor: [Neurodevelopmental Disorders] explode all trees
- #2 MeSH descriptor: [Central Nervous System Diseases] explode all trees
- #3 MeSH descriptor: [Intellectual Disability] explode all trees
- #4 (((neurodevelopment\* or neurotic\* or development\* or mental\* or central nervous system or cns or intellectual\* or ((disruptive or child) and behavio\*) or Communicati\* or speech\* or language or Learning or Motor\* or psychomotor or Reactive Attachment\* or Stereotypic Movement\*) and (disease\* or disorder\* or disabilit\* or syndrom\* or dysfunc\* or impair\* or deficienc\* or retardation\*)) or neurodisabilit\* or neuro-disabilit\* or idiocy or dyslexia or dyscalculia or autism\* or kaunner\* or ASD or Asperger\* or attention deficit\* or ADHD\* or ADDH or hyperactivity\* or impulsiv\* cerebral pals\* or spastic displeg\* or epilep\* or mutism\* or tic\* or Tourette\* or ((happy or child\*) and puppet\*) or fragile x or Frax\* or angelman\* or prader-willi\* or rett\* or smith-magenis or williams or Cri-du-Chat or De Lange or down\* or Coffin-Lowry or Lesch-Nyhan or Menkes Kinky Hair or Rubinstein-Taybi or WAGR or schizophreni\* or Adrenoleukodystrophy or Mucopolysaccharidosis)
- #5 #1 or #2 or #3 or #4
- #6 MeSH descriptor: [Melatonin] explode all trees
- #7 (melatonin\* or Circadin\* or Slenyto\* or (Methoxy near Acetyl near tryptamin\*))
- #8 #6 or #7
- #9 #5 and #8
- #10 MeSH descriptor: [Adolescent] explode all trees
- #11 MeSH descriptor: [Child] explode all trees
- #12 MeSH descriptor: [Infant] explode all trees
- #13 MeSH descriptor: [Pediatrics] explode all trees
- #14 (baby or babies or infan\* or child\* or toddler\* or pre-school\* or preschool\* or adolescen\* or teen\* or schoolchild\* or schoolage\* or pediatric\* or paediatric\*)
- #15 #10 or #11 or #12 or #13 or #14
- #16 #9 and #15

**MEDLINE Ovid (1946 to the date of the search)**

1. exp Neurodevelopmental Disorders/
2. exp Central Nervous System Diseases/
3. exp Intellectual Disability/
4. (((neurodevelopment\* or neurotic\* or development\* or mental\* or central nervous system or cns or intellectual\* or ((disruptive or child) and behavio\*) or Communicati\* or speech\* or language or Learning or Motor\* or psychomotor or Reactive Attachment\* or Stereotypic Movement\*) and (disease\* or disorder\* or disabilit\* or syndrom\* or dysfunc\* or impair\* or deficienc\* or retardation\*)) or neurodisabilit\* or neuro-disabilit\* or idiocy or dyslexia or dyscalculia or autism\* or kanner\* or ASD or Asperger\* or attention deficit\* or ADHD\* or ADDH or hyperactivity\* or impulsiv\* cerebral pals\* or spastic displeg\* or epilep\* or mutism\* or tic\* or Tourette\* or ((happy or child\*) and puppet\*) or fragile x or Frax\* or angelman\* or prader-willi\* or rett\* or smith-magenis or williams or Cri-du-Chat or De Lange or down\* or Coffin-Lowry or Lesch-Nyhan or Menkes Kinky Hair or Rubinstein-Taybi or WAGR or schizophreni\* or Adrenoleukodystrophy or Mucopolysaccharidosis).mp. [mp=title, abstract, original title, name of substance word, subject heading word, floating sub-heading word, keyword heading word, organism supplementary concept word, protocol supplementary concept word, rare disease supplementary concept word, unique identifier, synonyms]
5. 1 or 2 or 3 or 4
6. exp Melatonin/
7. (melatonin\* or Circadin\* or Slenyto\* or 5-Methoxy-N-Acetyltryptamin\* or N-Acetyl-5-Methoxytryptamin\*).mp. [mp=title, abstract, original title, name of substance word, subject heading word, floating sub-heading word, keyword heading word, organism supplementary concept word, protocol supplementary concept word, rare disease supplementary concept word, unique identifier, synonyms]
8. 6 or 7
9. 5 and 8
10. exp adolescent/ or exp child/ or exp infant/
11. exp Pediatrics/
12. (baby or babies or infan\* or child\* or toddler\* or pre-school\* or preschool\* or adolescen\* or teen\* or schoolchild\* or schoolage\* or pediatric\* or paediatric\*).mp. [mp=title, abstract, original title, name of substance word, subject heading word, floating sub-heading word, keyword heading word, organism supplementary concept word, protocol supplementary concept word, rare disease supplementary concept word, unique identifier, synonyms]

13. 10 or 11 or 12
14. 9 and 13
15. (randomized controlled trial or controlled clinical trial or retracted publication or retraction of publication).pt. or clinical trials as topic.sh. or trial.ti.
16. (random\* or blind\* or placebo\*).mp. [mp=title, abstract, original title, name of substance word, subject heading word, floating sub-heading word, keyword heading word, organism supplementary concept word, protocol supplementary concept word, rare disease supplementary concept word, unique identifier, synonyms]
17. 14 and (15 or 16)

#### Embase Ovid (1974 to the date of the search)

1. exp mental disease/
2. exp central nervous system disease/
3. exp intellectual impairment/
4. (((neurodevelopment\* or neurotic\* or development\* or mental\* or central nervous system or cns or intellectual\* or ((disruptive or child) and behavio\*) or Communicati\* or speech\* or language or Learning or Motor\* or psychomotor or Reactive Attachment\* or Stereotypic Movement\*) and (disease\* or disorder\* or disabilit\* or syndrom\* or dysfunc\* or impair\* or deficienc\* or retardation\*)) or neurodisabilit\* or neuro-disabilit\* or idiocy or dyslexia or dyscalculia or autis\* or kanner\* or ASD or Asperger\* or attention deficit\* or ADHD\* or ADDH or hyperactivity\* or impulsiv\* cerebral pals\* or spastic dispieg\* or epilep\* or mutism\* or tic\* or Tourette\* or ((happy or child\*) and puppet\*) or fragile x or Frax\* or angelman\* or prader-willi\* or rett\* or smith-magenis or williams or Cri-du-Chat or De Lange or down\* or Coffin-Lowry or Lesch-Nyhan or Menkes Kinky Hair or Rubinstein-Taybi or WAGR or schizophreni\* or Adrenoleukodystrophy or Mucopolysaccharidosis).mp. [mp=title, abstract, heading word, drug trade name, original title, device manufacturer, drug manufacturer, device trade name, keyword heading word, floating subheading word, candidate term word]
5. 1 or 2 or 3 or 4
6. exp melatonin/
7. (melatonin\* or Circadin\* or Slenyto\* or 5-Methoxy-N-Acetyltryptamin\* or N-Acetyl-5-Methoxytryptamin\*).mp. [mp=title, abstract, heading word, drug trade name, original title, device manufacturer, drug manufacturer, device trade name, keyword heading word, floating subheading word, candidate term word]
8. 6 or 7
9. 5 and 8
10. exp adolescent/ or exp child/
11. exp pediatrics/
12. (baby or babies or infan\* or child\* or toddler\* or pre-school\* or preschool\* or adolescen\* or teen\* or schoolchild\* or schoolage\* or pediatric\* or paediatric\*).mp. [mp=title, abstract, heading word, drug trade name, original title, device manufacturer, drug manufacturer, device trade name, keyword heading word, floating subheading word, candidate term word]
13. 10 or 11 or 12
14. 9 and 13
15. Randomized controlled trial/ or Controlled clinical trial/ or retracted article/ or (erratum or tombstone).pt. or trial.ti. or yes.ne.
16. (random\* or blind\* or placebo\*).mp. [mp=title, abstract, heading word, drug trade name, original title, device manufacturer, drug manufacturer, device trade name, keyword heading word, floating subheading word, candidate term word]
17. 14 and (15 or 16)

#### LILACS (Bireme; 1982 to the date of the search)

(((neurodevelopment\$ or neurotic\$ or development\$ or mental\$ or central nervous system or cns or intellectual\$ or ((disruptive or child) and behavio\$) or Communicati\$ or speech\$ or language or Learning or Motor\$ or psychomotor or Reactive Attachment\$ or Stereotypic Movement\$) and (disease\$ or disorder\$ or disabilit\$ or syndrom\$ or dysfunc\$ or impair\$ or deficienc\$ or retardation\$)) or neurodisabilit\$ or neuro-disabilit\$ or idiocy or dyslexia or dyscalculia or autis\$ or kanner\$ or ASD or Asperger\$ or attention deficit\$ or ADHD\$ or ADDH or hyperactivity\$ or impulsiv\$ cerebral pals\$ or spastic dispieg\$ or epilep\$ or mutism\$ or tic\$ or Tourette\$ or ((happy or child\$) and puppet\$) or fragile x or Frax\$ or angelman\$ or prader-willi\$ or rett\$ or smith-magenis or williams or Cri-du-Chat or De Lange or down\$ or Coffin-Lowry or Lesch-Nyhan or Menkes Kinky Hair or Rubinstein-Taybi or WAGR or schizophreni\$ or Adrenoleukodystrophy or Mucopolysaccharidosis) [Words] and (melatonin\$ or Circadin\$ or Slenyto\$ or 5-Methoxy-N-Acetyltryptamin\$ or N-Acetyl-5-Methoxytryptamin\$) [Words] and (baby or babies or infan\$ or child\$ or toddler\$ or pre-school\$ or preschool\$ or adolescen\$ or teen\$ or schoolchild\$ or schoolage\$ or pediatric\$ or paediatric\$) [Words]

#### PsycINFO (EBSCO Host; date will be given at review stage)

S11 S9 AND S10

1  
2  
3 S10 TX (random\* or blind\* or placebo\* or trial\*)  
4 S9 S5 AND S8  
5 S8 S6 OR S7  
6 S7 TX (melatonin\* or Circadin\* or Slenyto\* or 5-Methoxy-N-Acetyltryptamin\* or N-Acetyl-5-  
7 Methoxytryptamin\*)  
8 S6 MA Melatonin  
9 S5 S1 OR S2 OR S3 OR S4  
10 S4 TX (((neurodevelopment\* or neurotic\* or development\* or mental\* or central nervous system or cns or  
11 intellectual\* or ((disruptive or child) and behavio\*) or Communicati\* or speech\* or language or Learning or Motor\* or  
12 psychomotor or Reactive Attachment\* or Stereotypic Movement\*) and (disease\* or disorder\* or disabilit\* or syndrom\*  
13 or dysfunc\* or impair\* or deficienc\* or retardation\*)) or neurodisabilit\* or neuro-disabilit\* or idiocy or dyslexia or  
14 dyscalculia or autis\* or kanner\* or ASD or Asperger\* or attention deficit\* or ADHD\* or ADDH or hyperactivity\* or  
15 impulsiv\* cerebral pals\* or spastic dispieg\* or epilep\* or mutism\* or tic\* or Tourette\* or ((happy or child\*) and  
16 puppet\*) or fragile x or Frax\* or angelman\* or prader-willi\* or rett\* or smith-magenis or williams or Cri-du-Chat or De  
17 Lange or down\* or Coffin-Lowry or Lesch-Nyhan or Menkes Kinky Hair or Rubinstein-Taybi or WAGR or  
18 schizophreni\* or Adrenoleukodystrophy or Mucopolysaccharidosis)  
19 S3 MA Intellectual Disability  
20 S2 MA Central Nervous System Diseases  
21 S1 MA Neurodevelopmental Disorders

22 **Science Citation Index Expanded (1900 to the date of the search) and Conference Proceedings Citation Index –**  
23 **Science (1990 to the date of the search) (Web of Science)**

24 #5 #4 AND #3 AND #2 AND #1

25 #4 TI=(random\* or blind\* or placebo\* or trial\*) OR TS=(random\* or blind\* or placebo\*)

26 #3 TS=(baby or babies or infan\* or child\* or toddler\* or pre-school\* or preschool\* or adolescen\* or teen\* or  
27 schoolchild\* or schoolage\* or pediatric\* or paediatric\*)

28 #2 TS=(melatonin\* or Circadin\* or Slenyto\* or 5-Methoxy-N-Acetyltryptamin\* or N-Acetyl-5-Methoxytryptamin\*)

29 #1 TS=(((neurodevelopment\* or neurotic\* or development\* or mental\* or central nervous system or cns or intellectual\*  
30 or ((disruptive or child) and behavio\*) or Communicati\* or speech\* or language or Learning or Motor\* or psychomotor  
31 or Reactive Attachment\* or Stereotypic Movement\*) and (disease\* or disorder\* or disabilit\* or syndrom\* or dysfunc\* or  
32 impair\* or deficienc\* or retardation\*)) or neurodisabilit\* or neuro-disabilit\* or idiocy or dyslexia or dyscalculia or autis\*  
33 or kanner\* or ASD or Asperger\* or attention deficit\* or ADHD\* or ADDH or hyperactivity\* or impulsiv\* cerebral pals\*  
34 or spastic dispieg\* or epilep\* or mutism\* or tic\* or Tourette\* or ((happy or child\*) and puppet\*) or fragile x or Frax\* or  
35 angelman\* or prader-willi\* or rett\* or smith-magenis or williams or Cri-du-Chat or De Lange or down\* or Coffin-Lowry  
36 or Lesch-Nyhan or Menkes Kinky Hair or Rubinstein-Taybi or WAGR or schizophreni\* or Adrenoleukodystrophy or  
37 Mucopolysaccharidosis)

# BMJ Open

## Melatonin for sleep disorders in children with neurodevelopmental disorders: protocol for a systematic review with meta-analysis and Trial Sequential Analysis of randomised clinical trials

|                                 |                                                                                                                                                                                                                                                                                                                                                                                                                                                                                                                                                                                                                                                                                                                                                                                                                                                                                                                                                                    |
|---------------------------------|--------------------------------------------------------------------------------------------------------------------------------------------------------------------------------------------------------------------------------------------------------------------------------------------------------------------------------------------------------------------------------------------------------------------------------------------------------------------------------------------------------------------------------------------------------------------------------------------------------------------------------------------------------------------------------------------------------------------------------------------------------------------------------------------------------------------------------------------------------------------------------------------------------------------------------------------------------------------|
| Journal:                        | <i>BMJ Open</i>                                                                                                                                                                                                                                                                                                                                                                                                                                                                                                                                                                                                                                                                                                                                                                                                                                                                                                                                                    |
| Manuscript ID                   | bmjopen-2022-065520.R1                                                                                                                                                                                                                                                                                                                                                                                                                                                                                                                                                                                                                                                                                                                                                                                                                                                                                                                                             |
| Article Type:                   | Protocol                                                                                                                                                                                                                                                                                                                                                                                                                                                                                                                                                                                                                                                                                                                                                                                                                                                                                                                                                           |
| Date Submitted by the Author:   | 13-Sep-2022                                                                                                                                                                                                                                                                                                                                                                                                                                                                                                                                                                                                                                                                                                                                                                                                                                                                                                                                                        |
| Complete List of Authors:       | Jørgensen, Caroline Kamp; Rigshospitalet Copenhagen Trial Unit; Syddansk Universitet Det Sundhedsvidenskabelige Fakultet, Department of Regional Health Research<br>Hermann, Rikke; Centre for children, youth, and families<br>Juul, Sophie ; Rigshospitalet Copenhagen Trial Unit<br>Faltermeier, Pascal; MSH Medical School Hamburg<br>Horowitz, Mark; University College London Division of Psychiatry; North East London NHS Foundation Trust, Research and Development Department<br>Moncrieff, Joanna; University College London Division of Psychiatry; North East London NHS Foundation Trust, Research and Development Department<br>Gluud, Christian; Rigshospitalet Copenhagen Trial Unit; Syddansk Universitet Det Sundhedsvidenskabelige Fakultet, Department of Regional Health Research<br>Jakobsen, Janus; Rigshospitalet Copenhagen Trial Unit; Syddansk Universitet Det Sundhedsvidenskabelige Fakultet, Department of Regional Health Research |
| <b>Primary Subject Heading</b>: | Paediatrics                                                                                                                                                                                                                                                                                                                                                                                                                                                                                                                                                                                                                                                                                                                                                                                                                                                                                                                                                        |
| Secondary Subject Heading:      | Neurology                                                                                                                                                                                                                                                                                                                                                                                                                                                                                                                                                                                                                                                                                                                                                                                                                                                                                                                                                          |
| Keywords:                       | SLEEP MEDICINE, Paediatric neurology < NEUROLOGY, Developmental neurology & neurodisability < PAEDIATRICS                                                                                                                                                                                                                                                                                                                                                                                                                                                                                                                                                                                                                                                                                                                                                                                                                                                          |
|                                 |                                                                                                                                                                                                                                                                                                                                                                                                                                                                                                                                                                                                                                                                                                                                                                                                                                                                                                                                                                    |

SCHOLARONE™  
Manuscripts

# Melatonin for sleep disorders in children with neurodevelopmental disorders: protocol for a systematic review with meta-analysis and Trial Sequential Analysis of randomised clinical trials

Caroline Kamp Jørgensen<sup>1,2\*</sup>, Rikke Hermann<sup>1,3</sup>, Sophie Juul<sup>1</sup>, Pascal Faltermeier<sup>4</sup>, Mark Horowitz<sup>5,6</sup>, Joanna Moncrieff<sup>5,6</sup>, Christian Glud<sup>1,2</sup>, Janus Christian Jakobsen<sup>1,2</sup>

## Contact information

\* Corresponding author: Caroline Kamp Jørgensen: [caroline.joergensen@ctu.dk](mailto:caroline.joergensen@ctu.dk)  
Copenhagen Trial Unit, Copenhagen University Hospital – Rigshospitalet, Blegdamsvej 9, DK-2100 Copenhagen Ø, Denmark

## Affiliations:

<sup>1</sup> Copenhagen Trial Unit, Centre for Clinical Intervention Research, Capital Region of Denmark, Copenhagen University Hospital – Rigshospitalet, Copenhagen, Denmark

<sup>2</sup> Department of Regional Health Research, Faculty of Health Sciences, University of Southern Denmark, Odense, Denmark

<sup>3</sup> Centre for children, youth, and families, Glostrup Municipality, Denmark

<sup>4</sup> MSH Medical School Hamburg, University of Applied Sciences and Medical University, Hamburg, Germany

<sup>5</sup> Division of Psychiatry, University College London, London, UK

<sup>6</sup> Research and Development Department, North East London NHS Foundation Trust (NELFT), London, UK

**Word count:** 4,440



# Abstract

**Introduction:** Neurodevelopmental disorders are a group of disorders thought to be associated with the functioning of the brain and nervous system. Children with neurodevelopmental disorders often have sleep-related comorbidities that may negatively affect quality of life for both the children and their families. Melatonin is one of the most used interventions in children with neurodevelopmental disorders and sleep disorders. Previous reviews have investigated the effects of melatonin for sleep disorders in children with neurodevelopmental disorders, but these had important limitations, such as inadequate analysis of adverse effects, small sample sizes, and short follow-up.

**Methods and analysis:** This is a protocol for a systematic review with meta-analysis and Trial Sequential Analysis of randomised clinical trials. The protocol is reported in accordance with Preferred Reporting Items for Systematic Reviews and Meta-Analysis Protocols. We will search for published and unpublished trials in the Cochrane Central Register of Controlled Trials, MEDLINE Ovid, Embase Ovid, LILACS, Science Citation Index Expanded, Conference Proceedings Citation Index-Science, PsycINFO, ClinicalTrials.gov, and the International Clinical Trials Registry Platform. We will search the databases from their inception without language restrictions. We will also request clinical study reports from regulatory authorities and pharmaceutical companies. Review authors working in pairs will screen reports, extract data, and conduct risk of bias assessments using the Cochrane Risk of Bias tool. We will include randomised clinical trials comparing melatonin versus placebo or no intervention for sleep disorders in children with neurodevelopmental disorders. Primary outcomes will be total sleep time and adverse effects. Secondary outcomes will be quality of life of the child and caregivers and sleep onset latency. Data will be analysed using random-effects and fixed-effect meta-analyses. Certainty of evidence will be assessed with GRADE.

**Ethics and dissemination:** Ethical approval was not required for this protocol. The systematic review will be published in a peer-reviewed journal.

**PROSPERO registration number:** CRD42022337530

**Keywords:** Melatonin; neurodevelopmental disorders; sleep disorders; children; systematic review



## Strengths and limitations of this study

- The methodology of our systematic review is predefined in detail to avoid data-driven biased results.
- The protocol is based on the Cochrane Handbook, the eight-step procedure suggested by Jakobsen et al., Trial Sequential Analysis, and the Grading of Recommendations, Assessment, Development and Evaluation approach.
- The systematic review will consider the risks of random errors, systematic errors, publication bias, heterogeneity, and external validity.
- The systematic review will include both published and unpublished trials.
- We assess multiple outcomes and subgroup analyses which increases the risks of type I errors.

# Introduction

## Description of the condition

Neurodevelopmental disorders are a group of disorders thought to be associated with the functioning of the brain and nervous system.[1] Neurodevelopmental disorders are usually diagnosed in childhood and include neurological disorders such as cerebral palsy, epilepsy, Angelman syndrome, Down's syndrome, Fragile X syndrome, Prader-Willi syndrome, Rett syndrome, Smith-Magenis syndrome, Williams syndrome, and non-specific intellectual disability, along with some psychiatric disorders including autism spectrum disorder, attention deficit hyperactivity disorder (ADHD), and attention deficit disorder (ADD).[1, 2] Children with neurodevelopmental disorders may experience difficulties with learning, attention, behaviour, speech, motor skills, and other neurological functions.[1]

The impact of sleep disturbances was recently ranked as a top 10 research priority within the topics of children with neurodevelopmental disorders by a UK partnership of patients, carers, and clinicians.[3] Children with neurodevelopmental disorders often have sleep-related comorbidities, including sleep disorders such as insomnia disorder, hypersomnolence disorder, narcolepsy, breathing-related sleep disorders, circadian rhythm sleep disorders, rapid eye movement (REM) sleep arousal disorders, non-REM sleep arousal disorders, and nightmare disorders.[2, 4] Studies have shown the prevalence of comorbid neurodevelopmental disorders and sleep disorders is between 25% to 86% compared to 1% to 6% in the general paediatric population.[4-8] Sleep disorders may further enhance problems with learning and behaviour in children with neurodevelopmental disorders,[4-8] and often have a negative effect on quality of life for both the children and their families.[9, 10]

## Description of the intervention

Melatonin is a naturally occurring hormone in both humans and animals.[11] Previously, melatonin was derived from animal pineal tissue,[11] but it is now developed synthetically and distributed in different forms, including capsules, tablets, gummies, and liquids.[12] Melatonin is available in many countries either sold as prescription-only medicine or as over-the-counter medicine to treat

1  
2  
3  
4 sleep disorders in both children and adults, as it is hypothesised to be associated with few adverse  
5 effects.[11, 13] Furthermore, melatonin is one of the most commonly used interventions in children  
6 with neurodevelopmental disorders and sleep disorders.[14-18] The dosage recommendations vary  
7 according to country, but the UK National Health Service currently recommend treatment up to 13  
8 weeks of 2 mg one to two hours before bedtime for adults with sleep problems.[19] However, there  
9 are currently no clear guidelines for prescribing melatonin for children and adolescents with  
10 neurodevelopmental disorders.[5, 11]  
11  
12  
13  
14  
15  
16  
17  
18  
19

## 20 **How the intervention might work**

21  
22 The understanding of melatonin's underlying mechanisms has previously been extrapolated from  
23 animals to humans, but the exact physiological mechanisms of melatonin in humans remain  
24 unclear.[20-22] Melatonin is a neurohormone primarily secreted by the pineal gland.[13] Melatonin  
25 mediates dark signals, since the secretion of melatonin is related to darkness, and it is therefore  
26 associated with the circadian rhythm in humans.[13, 17] The secretion of melatonin is regulated by  
27 the suprachiasmatic nucleus in the hypothalamus, and the production of melatonin depends on  
28 darkness, as the exposure to light inhibits secretion.[11, 23] A decrease in the secretion of melatonin  
29 has been associated with aging and different diseases, and synthetic melatonin may theoretically  
30 reduce sleep disturbance related to melatonin deficiency.[13, 24] Previous studies have shown that  
31 melatonin improves total sleep time, sleep onset latency, and sleep quality for adults with sleep  
32 disorders, but the effects seem small.[13, 25] Furthermore, some studies suggest that children with  
33 autistic spectrum disorders have abnormal secretions of melatonin.[6, 26, 27] For these theoretical  
34 reasons, children with neurodevelopmental disorders may benefit from melatonin.  
35  
36  
37  
38  
39  
40  
41  
42  
43  
44  
45  
46  
47

## 48 **Why it is important to do this review**

49  
50 A systematic review published in 2018 investigated the effects of melatonin for sleep problems in  
51 children with neurodevelopmental disorders.[5] The review concluded that melatonin was safe and  
52 effective in improving sleep for children with neurodevelopmental disorders.[5] Another systematic  
53 review published in 2019 investigated the effects of oral melatonin for non-respiratory sleep  
54 disturbances in children with neurodisabilities.[28] The review concluded that there was some  
55 evidence of beneficial effects, but the extent of these effects was unclear due to the poor quality of  
56  
57  
58  
59  
60

1  
2  
3  
4 the evidence.[28] The review also concluded that melatonin was well-tolerated, as comparable  
5 adverse effects were found in the melatonin and placebo groups.[28]  
6  
7  
8

9 These previous reviews had important limitations. The conclusions were affected by a high degree  
10 of heterogeneity, high and unclear risk of bias in the included trials, and small sample sizes.[5, 28]  
11 Furthermore, the duration of treatment was limited to a maximum of 13 weeks, and adverse events  
12 were not adequately reported or analysed in either of the reviews.[5, 28]  
13  
14  
15  
16

17  
18 In recent studies, it has been questioned whether higher levels of melatonin are associated with  
19 delayed puberty, and other adverse effects of melatonin are also theoretically possible.[29-31] In  
20 2021, a two-year follow-up of a trial investigating the treatment with melatonin in 119 children with  
21 autism spectrum disorder was published.[32] This trial concluded that melatonin was safe and  
22 effective for long-term treatment in children.[32] Other, new randomised clinical trials might have  
23 been published since the last published systematic reviews, and on-going trials have been identified  
24 on ClinicalTrials.gov.[33, 34] These trials may contribute important information about the use of  
25 melatonin in children with neurodevelopmental disorders, including adverse effects. Therefore,  
26 there is a need for a systematic review to shed light on this important topic and to assess whether  
27 the beneficial effects outweigh any harmful effects. Our systematic review will take risks of  
28 systematic errors ('bias'), risks of random errors ('play of chance'), and the certainty of the evidence  
29 into consideration when assessing the effects of melatonin for sleep disorders in children with  
30 neurodevelopmental disorders.  
31  
32  
33  
34  
35  
36  
37  
38  
39  
40  
41  
42  
43

## 44 **Methods and analysis**

45  
46 The present protocol has been registered in the PROSPERO database (CRD42022337530) and is  
47 reported according to the guidance suggested in the Preferred Reporting Items for Systematic  
48 Reviews and Meta-Analysis Protocols (PRISMA-P) statement (please find the checklist in  
49 **supplemental material 1**).[35, 36]  
50  
51  
52  
53  
54  
55

## 56 **Criteria for considering studies for this review**

57  
58  
59  
60

## Types of studies

We will include randomised clinical trials irrespective of trial design (including crossover trials), setting, publication status, publication year, and language. We will use online translation services to translate foreign abstracts and reach out to our international colleagues (who will be thanked in the acknowledgements) for help with data extraction of relevant trials. We will not include quasi-randomised trials, cluster-randomised trials, or observational studies.

## Types of participants

We will include trials randomising children and adolescents (below 18 years of age) with neurodevelopmental disorders, such as cerebral palsy, epilepsy, Angelman syndrome, Down's syndrome, Fragile X syndrome, Prader-Willi syndrome, Rett syndrome, Smith-Magenis syndrome, Williams syndrome, non-specific intellectual disability, autism spectrum disorder, ADHD, and ADD.[1, 2] Trials will be included if the disorders of the participants are diagnosed by standardised diagnostic criteria, such as the Diagnostic and Statistical Manual of Mental Disorders[37] or International Classification of Diseases[38] or where the diagnosis or designation of neurodevelopmental disorder is made by a clinician. The participants also need to have a diagnosis of any type of sleep disorder (as defined by trialists), such as insomnia disorder, hypersomnolence disorder, narcolepsy, breathing-related sleep disorder, circadian rhythm sleep disorders, REM sleep arousal disorder, non-REM sleep arousal disorder, and nightmare disorders.

We will include participants irrespective of sex, comorbidities, demographic factors, the stage of their condition, and the care setting. If a trial reports data where only a subset of participants is eligible (e.g. a combination of children and adults), we will only include data from those participants that fulfil the inclusion criteria, and we will therefore require subset data for the specific group to be available.

## Types of interventions

We will include trials where participants in the experimental group are given melatonin at any dose, form (e.g. tablet, capsules, gummies, liquids), duration of administration, type of administration (e.g. oral), timing of administration, and setting. We will include trials where participants receive a

1  
2  
3  
4 co-intervention (e.g. pharmacological interventions, such as methylphenidate, or non-  
5 pharmacological interventions, such as exercise), providing it is delivered equally (in any aspect,  
6 e.g. same dose, equal subset of population receiving co-intervention, etc.) in the experimental group  
7 and the control group.  
8  
9  
10  
11  
12

## 13 14 **Comparators**

15  
16 As control intervention we will accept placebo or 'no intervention'.  
17  
18  
19  
20

## 21 22 **Types of outcome measures**

### 23 24 **Primary outcomes**

- 25  
26 1) Total sleep time (in minutes using any type of measurement, e.g. polysomnography,  
27 actigraphy, self-report, or parent-report).  
28  
29 2) Adverse effects  
30  
31 a) The proportion of participants with one or more serious adverse events. We will use the  
32 International Conference on Harmonisation of technical requirements for registration of  
33 pharmaceuticals for human use—Good Clinical Practice (ICH-GCP) definition of a serious  
34 adverse event, which is any untoward medical occurrence that resulted in death, was life-  
35 threatening, required hospitalisation or prolonging of existing hospitalisation, resulted in  
36 persistent or significant disability or jeopardised the participant.[39] If the trialists do not use  
37 the ICH-GCP definition, we will include the data if the trialists use the term 'serious adverse  
38 event'. If the trialists do not use the ICH-GCP definition nor use the term serious adverse  
39 event, then we will also include the data provided the event clearly fulfils the ICH-GCP  
40 definition for a serious adverse event. We will secondly analyse each type of serious adverse  
41 event separately.  
42  
43 b) The proportion of participants with one or more non-serious adverse events (any adverse  
44 event not classified as serious). We will also analyse each type of adverse event separately.  
45  
46  
47  
48  
49  
50  
51  
52  
53  
54

### 55 56 **Secondary outcomes**

57  
58  
59  
60

- 1) Quality of life of the child (any valid continuous scale, e.g. Child Quality of Life Questionnaire).[40]
- 2) Quality of life of the parents/caregivers (any valid continuous scale, e.g. SF-36).[41]
- 3) Sleep onset latency (in minutes using any type of measurement, e.g. polysomnography, actigraphy, self-report, or parent-report).

### **Exploratory outcomes**

- 1) Quality of sleep (any valid continuous scale), such as the Pittsburgh Sleep Quality Index.[42]
- 2) Delayed puberty or any reports of hormonal changes.
- 3) Any continuous scale assessing adverse effects (e.g. Pediatric Adverse Event Rating Scale).[43]

### **Timing of outcome assessment**

We will include outcome data recorded at the end of the treatment period primarily and at maximum follow-up secondarily.

## **Search methods for identification of studies**

### **Electronic searches**

We will search the following:

- Cochrane Central Register of Controlled Trials (CENTRAL; current issue) in The Cochrane Library
- MEDLINE Ovid (1946 onwards)
- Embase Ovid (1974 onwards)
- LILACS (Latin American and Caribbean Health Science Information database; 1982 onwards)
- Science Citation Index Expanded (Web of Science; 1964 onwards)
- Conference Proceedings Citation Index-Science (Web of Science; 1990 onwards)
- PsycINFO (1967 onwards)
- ClinicalTrials.gov
- International Clinical Trials Registry Platform (ICTRP)

1  
2  
3  
4  
5  
6 Please see **supplemental material 2** for the search strategy.  
7  
8  
9

## 10 **Searching other resources**

11  
12  
13 We will check reference lists of all included trials and any relevant systematic reviews to identify  
14 additional trials. We will also search for errata and retraction statements for the included trials. We  
15 will search websites of pharmaceutical companies (e.g. Natrol, Neurim Pharmaceuticals, Takeda  
16 Pharma), websites of U.S. Food and Drug Administration (FDA) and European Medicines Agency  
17 (EMA) to identify relevant trials. We will request FDA, EMA, and national medicines agencies to  
18 provide all publicly releasable information about relevant studies that were submitted for marketing  
19 approval, including clinical study reports. We will contact authors of eligible trials and other experts  
20 to identify any relevant trials (published or unpublished).  
21  
22  
23  
24  
25  
26  
27  
28  
29

## 30 **Data collection and analysis**

31  
32 We will perform and report the review based on the recommendations in the Cochrane Handbook  
33 for Systematic Reviews of Interventions. [44] Analyses will be performed using Stata version  
34 17[45] and Trial Sequential Analysis.[46, 47]  
35  
36  
37  
38  
39

## 40 **Selection of studies**

41  
42  
43 Two review authors will independently screen titles and abstracts using Covidence.[48] We will  
44 mark articles that clearly do not meet the eligibility criteria as excludes, while potentially eligible  
45 articles will go through to the next phase. We will retrieve all relevant full-text study  
46 reports/publications, and two review authors will independently screen the full text to identify and  
47 record reasons for exclusion of the ineligible trials. The two review authors will resolve any  
48 disagreement through discussion, or, if required, they will consult with a third author (JCJ). We will  
49 illustrate the selection process of the trials in a PRISMA flow diagram.[49] If multiple reports are  
50 available for a single trial, all reports will be grouped under a single reference ID.  
51  
52  
53  
54  
55  
56  
57  
58  
59  
60



1  
2  
3  
4  
5  
6  
7  
8  
9  
10  
11  
12  
13  
14  
15  
16  
17  
18  
19  
20  
21  
22  
23  
24  
25  
26  
27  
28  
29  
30  
31  
32  
33  
34  
35  
36  
37  
38  
39  
40  
41  
42  
43  
44  
45  
46  
47  
48  
49  
50  
51  
52  
53  
54  
55  
56  
57  
58  
59  
60

## Data extraction and management

Review authors in pairs will independently extract data from the included trials using a pilot tested data extraction form. Disagreements will be resolved through internal discussion or, if required, by discussion with a third author (JCJ). The two review authors will assess all publications of a trial together to evaluate all available data simultaneously. We will contact trial authors by email to obtain any additional data, which may not have been reported sufficiently in the publication. We will extract the following data:

- Methods: trial setting, trial location, trial design, trial duration, duration of follow-ups, date of the trial, estimation of sample size, inclusion criteria, and exclusion criteria
- Participants: number randomised, number analysed for each outcome, number lost to follow-up, age (mean and standard deviation), sex ratio, and diagnostic criteria
- Interventions: type, dose, timing, and duration of intervention
- Control: type, dose, timing, and duration of comparison
- Co-intervention: type, dose, timing, and duration of co-interventions
- Outcomes: primary, secondary, and exploratory outcomes at the reported time points
- Notes: trial funding and conflicts of interest of the trial authors

One review author will transfer the data to Stata. We will double-check the data by comparing the data presented in the review to the data extraction form.

## Assessment of risk of bias in included studies

Our bias risk assessment will be based on the Cochrane Risk of Bias tool—version 2 (RoB 2) as recommended in the Cochrane Handbook of Systematic Reviews of Interventions.[44] We will evaluate the methodology in respect of the following bias domains:

- Bias arising from the randomisation process
- Bias due to deviations from the intended interventions (effect of assignment to intervention).
- Bias due to missing outcome data
- Bias in measurement of the outcome
- Bias in selection of the reported result

1  
2  
3  
4 Review authors in pairs will independently assess the risk of bias using a template (available  
5 at <https://www.riskofbias.info/>). Disagreements will be resolved through internal discussion or, if  
6 required, by discussion with a third author (JCJ). We will use the signalling questions in the RoB 2  
7 tool to rate each domain at either 'low risk of bias', 'some concerns', or 'high risk of bias'. We will  
8 assess all domains of risk of bias for each outcome in each trial. The overall risk of bias of a result  
9 will be judged to be low if all domains are assessed at low risk of bias. If one or more domains are  
10 assessed at either some concerns or high risk of bias, the overall risk of bias will be assessed at  
11 high. We will assess the risk of bias for the outcomes of the included trials presented in the  
12 'Summary of findings' table (primary and secondary outcomes at end of treatment). The risk of bias  
13 assessments will be illustrated in a table (using <https://www.riskofbias.info/>), and the assessments  
14 will be used to conduct subgroup analyses. The risk of bias assessment will also be used to inform  
15 the Grading of Recommendations, Assessment, Development and Evaluation (GRADE) and the  
16 'Summary of findings' table. For trials using crossover design, only data from the first period will be  
17 assessed.  
18  
19  
20  
21  
22  
23  
24  
25  
26  
27  
28  
29  
30

## 31 **Measures of treatment effect**

### 32 **Continuous outcomes**

33 We will calculate mean differences (MDs) and consider calculating standardised mean differences  
34 (SMD) with 95% CIs for continuous outcomes. We will enter data presented as a scale with a  
35 consistent direction of effect. We will primarily analyse scores assessed at single time points. If  
36 only changes from baseline scores are reported, we will analyse the results together with follow-up  
37 scores for MD (not for SMD).[44] If standard deviations (SDs) are not reported, we will calculate  
38 the SDs using trial data, if possible, or request such data from the authors.  
39  
40  
41  
42  
43  
44  
45  
46  
47

### 48 **Dichotomous outcomes**

49 We will calculate risk ratios (RRs) with 95% confidence intervals (CI) for dichotomous outcomes.  
50  
51  
52  
53

### 54 **Unit of analysis issues**

55 We will only include randomised clinical trials. Trials using a crossover design will be treated as  
56 parallel trials, since only data from the first period will be included.[44] Where multiple trial arms  
57  
58  
59  
60

1  
2  
3  
4 are reported in a single trial, we will include only the relevant arms. For trials with multiple relevant  
5 experimental or control groups, we will combine the groups as appropriate.[44]  
6  
7  
8

9  
10 If, during the selection of trials, we identify observational studies (i.e. quasi-randomised studies,  
11 cohort studies, or patient reports) that report adverse events associated with melatonin, we will  
12 review these studies for report on adverse events. We will not specifically search for observational  
13 studies for inclusion in this review, which is a limitation in our review. We will not analyse the  
14 extracted data on harms from non-randomised clinical studies together with the data on harms from  
15 the randomised clinical trials included in the review; neither will we assess the bias risk in these  
16 studies. However, we will refer to the extracted narrative data on harm with a link to a table in an  
17 appendix. We are aware that the decision not to search for all observational studies might bias our  
18 review towards assessment of benefits and might overlook certain harms such as late or rare harms.  
19 If we demonstrate benefits from the use of melatonin in children and adolescents with  
20 neurodevelopmental disorders, then a systematic review of harms in observational studies ought to  
21 be launched.[50]  
22  
23  
24  
25  
26  
27  
28  
29  
30  
31  
32  
33

### 34 **Dealing with missing data**

35  
36 We will, as the first option, contact all trial authors to obtain information on missing data (i.e. for  
37 data extraction and for assessment of risk of bias, as specified above). We will use intention-to-treat  
38 data if provided by the trialists.[51]  
39  
40  
41  
42

### 43 **Dichotomous outcomes**

44  
45 We will not impute missing values for any outcomes in our primary analysis. In our sensitivity  
46 analyses (see below), we will impute data.  
47  
48  
49

### 50 **Continuous outcomes**

51  
52 We will not impute missing values for any outcomes in our primary analysis. In our sensitivity  
53 analysis (see below) for continuous outcomes, we will impute data.  
54  
55  
56  
57

### 58 **Assessment of heterogeneity**

1  
2  
3  
4 We will investigate forest plots to visually assess for signs of heterogeneity. We will also estimate  
5 the presence of statistical heterogeneity by a  $\chi^2$  test (threshold  $P < 0.05$ ) and measure the  
6 quantities of heterogeneity by the  $I^2$  statistic.[52, 53] We will investigate possible heterogeneity  
7 through subgroup analyses. We may ultimately decide that a meta-analysis should be  
8 avoided.[44] We will interpret  $I^2$  heterogeneity as suggested by the Cochrane Handbook for  
9 Systematic Reviews of Interventions.[44] If we identify substantial heterogeneity ( $I^2 > 50\%$ ), we  
10 will report it, and explore the possible causes by prespecified subgroup analyses. We will carefully  
11 investigate trial characteristics and report if we find unexpected heterogeneity due to clinical or  
12 methodological factors. Ultimately it will be decided if meta-analysis should be avoided.  
13  
14  
15  
16  
17  
18  
19  
20  
21  
22

### 23 **Assessment of reporting biases**

24  
25 We will use funnel plots to assess reporting bias if ten or more trials are included in an  
26 outcome.[44] We will visually inspect funnel plots to assess the risk of small trial effects that could  
27 potentially reflect publication bias. We are aware of the limitations of a funnel plot (i.e. a funnel  
28 plot assesses bias due to small sample size). From this information, we will assess possible risk of  
29 publication bias. For dichotomous outcomes, we will test asymmetry with the Harbord test[54] if  
30  $\tau^2$  is less than 0.1 and with the R ucker test if  $\tau^2$  is more than 0.1. For continuous outcomes, we will  
31 use the regression asymmetry test[55] and the adjusted rank correlation.[56]  
32  
33  
34  
35  
36  
37  
38  
39

### 40 **Data synthesis**

#### 41 **Meta-analysis**

42  
43 We will undertake this meta-analysis according to the recommendations stated in the Cochrane  
44 Handbook for Systematic Reviews of Interventions,[44] Keus et al.,[57] and our eight-step  
45 procedure suggested by Jakobsen et al.[58] We will assess our intervention effects with both  
46 random-effects meta-analyses (Hartung-Knapp-Sidik-Jonkman)[59] and fixed-effect meta-analyses  
47 (Mantel-Haenszel for dichotomous outcomes and inverse variance for continuous outcomes),[44,  
48 60] and report both meta-analysis results.[58] We will primarily report the most conservative result  
49 (widest confidence interval and highest P value), and report the less conservative result as a  
50 sensitivity analysis.[58] As two primary outcomes are specified, we will consider a P value of 0.025  
51 or less as the threshold for statistical significance for all outcomes.[58] Our primary analyses will  
52  
53  
54  
55  
56  
57  
58  
59  
60

1  
2  
3  
4 include all trials. Where data are only available from one trial, we will use Fisher's exact test for  
5 dichotomous data and Student's t-test for continuous data.[61, 62]  
6  
7  
8

### 9 **Trial Sequential Analysis**

10  
11 Traditional meta-analysis runs the risk of random errors due to sparse data and repetitive testing of  
12 accumulating data when updating reviews. We wish to control for the risks of type I and type II  
13 errors. We will therefore perform Trial Sequential Analysis on all outcomes, in order to calculate  
14 the required information size (i.e. the number of participants needed in a meta-analysis to detect or  
15 reject a certain intervention effect) and the cumulative Z-curve's breach of relevant trial sequential  
16 monitoring boundaries.[47, 63-68] A more detailed description of Trial Sequential Analysis can be  
17 found in the manual[47] and at [www.ctu.dk/tsa/](http://www.ctu.dk/tsa/). For dichotomous outcomes, we will estimate the  
18 required information size based on the observed proportion of patients with an outcome in the  
19 control group (the cumulative proportion of patients with an event in the control groups relative to  
20 all patients in the control groups), a relative risk reduction or a relative risk increase of 25%, an  
21 alpha of 2.5% for all our outcomes, a beta of 10%, and the observed diversity as suggested by the  
22 trials in the meta-analysis. For continuous outcomes, we will use the observed standard deviation  
23 (SD) in the control group, a mean difference of 30 minutes when assessing total sleep time;  
24 otherwise, a mean difference of the observed SD/2, an alpha of 2.5% for all outcomes, a beta of  
25 10%, and the observed diversity of the trials in the meta-analysis. We will only use the diversity-  
26 adjusted required information size (DARIS) for random-effects Trial Sequential Analyses.  
27  
28  
29  
30  
31  
32  
33  
34  
35  
36  
37  
38  
39  
40  
41

### 42 **Subgroup analysis and investigation of heterogeneity**

43  
44 We will perform the following subgroup analyses on the primary outcomes:

- 45 1. Type of neurodevelopmental disorder: this subgroup analysis will assess whether the effects  
46 of melatonin are different depending on the neurodevelopmental disorder of the child.  
47
- 48 2. Age (below 12 years compared to above 12 years and preschool-age children compared to  
49 school-age children (as defined by trialists)): this will assess whether the effects of  
50 melatonin vary depending on the age of the participants.  
51
- 52 3. Type of comparator (placebo or no intervention): this subgroup analysis will assess whether  
53 the effects of melatonin vary depending on the comparator.  
54  
55  
56  
57  
58  
59  
60

4. Timing of the melatonin administration. If data are available, we will use the following comparisons: < 2 hours before bedtime, 2-4 hours before bedtime, or 4-8 hours before bedtime. If not, we will use definitions by trialists. This subgroup analysis is relevant, because the timing of administration may affect the outcomes.[69-71]
5. Formulation of medication: this subgroup analysis will assess whether the effects of melatonin vary depending on the formulation of melatonin.
6. Type of sleep disorder: this subgroup analysis will assess whether the effects of melatonin vary depending on the type of sleep disorder.
7. Trials at high risk of bias compared to trials at low risk of bias: this subgroup analysis will assess whether the effects of melatonin vary depending on the risk of bias of the included trials.
8. Duration of trials: this subgroup analysis will assess whether the effects of melatonin vary depending on the duration of the included trials.

Post-hoc subgroup analyses might be warranted if unexpected clinical or statistical heterogeneity is identified during the analysis of the review results.[58] We will disclose any new subgroup analyses not reported in this protocol in the 'Differences between protocol and review' section of the systematic review.

### **Sensitivity analysis**

To assess the potential impact of the missing data, we will perform the two following sensitivity analyses on the primary outcomes:

'Best-worst-case' scenario: we will assume that all participants lost to follow-up in the experimental group had beneficial outcomes (no serious adverse events/improved quality of sleep defined as the group mean plus two SDs).[58] We will accordingly assume that all participants lost to follow-up in the control group had poor outcomes (serious adverse events/deteriorated quality of sleep defined as the group mean plus two SDs).[58]

'Worst-best-case' scenario: we will assume that all participants lost to follow-up in the experimental group had poor outcomes (serious adverse events/deteriorated quality of sleep defined as the group

1  
2  
3  
4 mean plus two SDs).[58] We will accordingly assume that all participants lost to follow-up in the  
5 control group had beneficial outcomes (no serious adverse events/improved quality of sleep defined  
6 as the group mean plus two SDs).[58]  
7  
8  
9

10  
11 We will present the results of both scenarios in our review.  
12  
13

14 We will assess the potential impact of missing SDs for quality of sleep as follows: when SDs are  
15 missing, and it is not possible to calculate them, we will impute SDs from trials with similar  
16 populations and low risk of bias. If we find no such trials, we will impute SDs from trials with a  
17 similar population. As the final option, we will impute SDs from all trials. We will present results  
18 of this scenario in our review.  
19  
20  
21  
22  
23

## 24 25 26 **Summary of findings and assessment of the certainty of the evidence** 27

28 Review authors in pairs will use GRADE to assess the certainty of the body of evidence associated  
29 with each of the primary and secondary outcomes at end of treatment in our review. We will  
30 construct 'Summary of findings' tables using the GRADEpro GDT.[72] The GRADE approach  
31 appraises the certainty of a body of evidence based on the extent to which one can be confident that  
32 an estimate of effect or association reflects the item being assessed. We will assess the GRADE  
33 levels of evidence as either high, moderate, low, or very low certainty on the following quality  
34 measures: risk of bias (the overall risk of bias will be used for each outcome), directness of the  
35 evidence, heterogeneity of the data, precision of effect estimates (assessed by Trial Sequential  
36 Analysis), and risk of publication bias.[72] We will downgrade the evidence by one or two levels  
37 due to serious or very serious issues. We will downgrade imprecision in GRADE by two levels if  
38 the accrued number of participants is below 50% of the DARIS, and one level if between 50 and  
39 100% of DARIS. We will not downgrade if the cumulative Z-curve crosses the monitoring  
40 boundaries for benefit, harm, or futility, or DARIS is reached. Two review authors will assess the  
41 certainty of evidence independently and decide on downgrading. If no agreement can be reached, a  
42 third review author (JCJ) will resolve the discussion. We will justify all decisions to downgrade the  
43 certainty of evidence using footnotes, and we will make comments to aid the reader's understanding  
44 of the review where necessary. The 'Summary of findings' table will also report the anticipated  
45 absolute effects, relative effects, number of participants, type of participants, and setting.  
46  
47  
48  
49  
50  
51  
52  
53  
54  
55  
56  
57  
58  
59  
60



## Differences between the protocol and the review

We will conduct the review according to this published protocol and report any deviations from it in the “differences between the protocol and the review” section of the systematic review.

## Patient and public involvement

None.

## Ethics and dissemination

Ethical approval was not required for this protocol and systematic review. The results of the systematic review will be published in a peer-reviewed journal to help inform future research and clinical practice.

## Acknowledgements

We thank Sarah Louise Klingenberg (Information Specialist, The Cochrane Hepato-Biliary Group, Copenhagen Trial Unit, Centre for Clinical Intervention Research, Copenhagen University Hospital - Rigshospitalet, Denmark) for the help with developing the search strategy.

## Contributors

CKJ, RH, SJ, PF, MH, JM, CG, and JCJ contributed to the conceptualisation and design of the study. CKJ and JCJ wrote the original draft. All authors commented and approved the final manuscript. JCJ is the guarantor of the review.

## Funding

This research received no specific grant from any funding agency in the public, commercial or not-for-profit sectors.

## Competing interests

None declared.

## References

1. United States Environmental Protection Agency. Neurodevelopmental Disorders 2015 [Available from: [https://www.epa.gov/sites/default/files/2015-10/documents/ace3\\_neurodevelopmental.pdf](https://www.epa.gov/sites/default/files/2015-10/documents/ace3_neurodevelopmental.pdf) accessed 16 September 2021.
2. Morris-Rosendahl DJ, Crocq MA. Neurodevelopmental disorders-the history and future of a diagnostic concept. *Dialogues Clin Neurosci* 2020;22(1):65-72. doi: 10.31887/DCNS.2020.22.1/macrocq [published Online First: 2020/07/24]
3. Morris C, Simkiss D, Busk M, et al. Setting research priorities to improve the health of children and young people with neurodisability: a British Academy of Childhood Disability-James Lind Alliance Research Priority Setting Partnership. *BMJ Open* 2015;5(1):e006233. doi: 10.1136/bmjopen-2014-006233 [published Online First: 2015/01/30]
4. Robinson-Shelton A, Malow BA. Sleep disturbances in neurodevelopmental disorders. *Curr Psychiatry Rep* 2016;18(1):6. doi: 10.1007/s11920-015-0638-1 [published Online First: 2016/01/01]
5. Abdelgadir IS, Gordon MA, Akobeng AK. Melatonin for the management of sleep problems in children with neurodevelopmental disorders: a systematic review and meta-analysis. *Arch Dis Child* 2018;103(12):1155-62. doi: 10.1136/archdischild-2017-314181 [published Online First: 2018/05/04]
6. Gringras P, Nir T, Breddy J, et al. Efficacy and safety of pediatric prolonged-release melatonin for insomnia in children with autism spectrum disorder. *J Am Acad Child Adolesc Psychiatry* 2017;56(11):948-57 e4. doi: 10.1016/j.jaac.2017.09.414 [published Online First: 2017/11/04]
7. Hollway JA, Aman MG. Pharmacological treatment of sleep disturbance in developmental disabilities: a review of the literature. *Res Dev Disabil* 2011;32(3):939-62. doi: 10.1016/j.ridd.2010.12.035 [published Online First: 2011/02/08]
8. Johnson CR. Sleep problems in children with mental retardation and autism. *Child Adolesc Psychiatr Clin N Am* 1996;5(3):673-84. doi: 10.1016/s1056-4993(18)30355-9
9. Gringras P, Gamble C, Jones AP, et al. Melatonin for sleep problems in children with neurodevelopmental disorders: randomised double masked placebo controlled trial. *BMJ* 2012;345:e6664. doi: 10.1136/bmj.e6664 [published Online First: 2012/11/07]
10. Devnani PA, Hegde AU. Autism and sleep disorders. *J Pediatr Neurosci* 2015;10(4):304-7. doi: 10.4103/1817-1745.174438 [published Online First: 2016/03/11]
11. Esposito S, Laino D, D'Alonzo R, et al. Pediatric sleep disturbances and treatment with melatonin. *J Transl Med* 2019;17(1):77. doi: 10.1186/s12967-019-1835-1 [published Online First: 2019/03/16]
12. Wang SY, Shi XC, Laborda P. Indole-based melatonin analogues: synthetic approaches and biological activity. *Eur J Med Chem* 2020;185:111847. doi: 10.1016/j.ejmech.2019.111847 [published Online First: 2019/11/16]

13. Xie Z, Chen F, Li WA, et al. A review of sleep disorders and melatonin. *Neurol Res* 2017;39(6):559-65. doi: 10.1080/01616412.2017.1315864 [published Online First: 2017/05/04]
14. Boafo A, Greenham S, Sullivan M, et al. Medications for sleep disturbance in children and adolescents with depression: a survey of Canadian child and adolescent psychiatrists. *Child Adolesc Psychiatry Ment Health* 2020;14:10. doi: 10.1186/s13034-020-00316-8 [published Online First: 2020/03/17]
15. Kimland EE, Bardage C, Collin J, et al. Pediatric use of prescribed melatonin in Sweden 2006-2017: a register based study. *Eur Child Adolesc Psychiatry* 2021;30(9):1339-50. doi: 10.1007/s00787-020-01598-1 [published Online First: 2020/07/24]
16. Owens JA, Rosen CL, Mindell JA, et al. Use of pharmacotherapy for insomnia in child psychiatry practice: A national survey. *Sleep Med* 2010;11(7):692-700. doi: 10.1016/j.sleep.2009.11.015 [published Online First: 2010/07/14]
17. Rzepka-Migut B, Paprocka J. Efficacy and safety of melatonin treatment in children with autism spectrum disorder and attention-deficit/hyperactivity disorder - a review of the literature. *Brain Sci* 2020;10(4) doi: 10.3390/brainsci10040219 [published Online First: 2020/04/11]
18. Schwichtenberg AJ, Malow BA. Melatonin treatment in children with developmental disabilities. *Sleep Med Clin* 2015;10(2):181-7. doi: 10.1016/j.jsmc.2015.02.008 [published Online First: 2015/06/10]
19. National Health Service. Melatonin for sleep problems. 2019
20. Cipolla-Neto J, Amaral FGD. Melatonin as a hormone: new physiological and clinical insights. *Endocr Rev* 2018;39(6):990-1028. doi: 10.1210/er.2018-00084 [published Online First: 2018/09/15]
21. Pévet P. Melatonin in animal models. *Dialogues Clin Neurosci* 2004;5(4):343-52. doi: 10.31887/DCNS.2003.5.4/ppvet
22. Tosini G, Owino S, Guillaume JL, et al. Understanding melatonin receptor pharmacology: latest insights from mouse models, and their relevance to human disease. *Bioessays* 2014;36(8):778-87. doi: 10.1002/bies.201400017 [published Online First: 2014/06/07]
23. Janjua I, Goldman RD. Sleep-related melatonin use in healthy children. *Can Fam Physician* 2016;62(4):315-16.
24. Karasek M. Melatonin, human aging, and age-related diseases. *Exp Gerontol* 2004;39(11-12):1723-9. doi: 10.1016/j.exger.2004.04.012 [published Online First: 2004/12/08]
25. Ferracioli-Oda E, Qawasmi A, Bloch MH. Meta-analysis: melatonin for the treatment of primary sleep disorders. *PLoS One* 2013;8(5):e63773. doi: 10.1371/journal.pone.0063773 [published Online First: 2013/05/17]
26. Rossignol DA, Frye RE. Melatonin in autism spectrum disorders: a systematic review and meta-analysis. *Dev Med Child Neurol* 2011;53(9):783-92. doi: 10.1111/j.1469-8749.2011.03980.x [published Online First: 2011/04/27]
27. Tordjman S, Anderson GM, Pichard N, et al. Nocturnal excretion of 6-sulphatoxymelatonin in children and adolescents with autistic disorder. *Biol Psychiatry* 2005;57(2):134-8. doi: 10.1016/j.biopsych.2004.11.003 [published Online First: 2005/01/18]
28. Parker A, Beresford B, Dawson V, et al. Oral melatonin for non-respiratory sleep disturbance in children with neurodisabilities: systematic review and meta-analyses. *Dev Med Child Neurol* 2019;61(8):880-90. doi: 10.1111/dmcn.14157 [published Online First: 2019/02/03]
29. Boafo A, Greenham S, Alenezi S, et al. Could long-term administration of melatonin to prepubertal children affect timing of puberty? A clinician's perspective. *Nat Sci Sleep* 2019;11:1-10. doi: 10.2147/NSS.S181365 [published Online First: 2019/02/19]

1  
2  
3  
4  
5  
6  
7  
8  
9  
10  
11  
12  
13  
14  
15  
16  
17  
18  
19  
20  
21  
22  
23  
24  
25  
26  
27  
28  
29  
30  
31  
32  
33  
34  
35  
36  
37  
38  
39  
40  
41  
42  
43  
44  
45  
46  
47  
48  
49  
50  
51  
52  
53  
54  
55  
56  
57  
58  
59  
60

30. Kennaway DJ. Potential safety issues in the use of the hormone melatonin in paediatrics. *J Paediatr Child Health* 2015;51(6):584-9. doi: 10.1111/jpc.12840 [published Online First: 2015/02/04]
31. Abdallah N, Attia A, Montaser B. Role of melatonin in constitutional delayed puberty in boys. *Menoufia Med J* 2020;33(1) doi: 10.4103/mmj.mmj\_300\_18
32. Malow BA, Findling RL, Schroder CM, et al. Sleep, Growth, and Puberty After 2 Years of Prolonged-Release Melatonin in Children With Autism Spectrum Disorder. *J Am Acad Child Adolesc Psychiatry* 2021;60(2):252-61 e3. doi: 10.1016/j.jaac.2019.12.007 [published Online First: 2020/01/27]
33. ClinicalTrials.gov. Does melatonin restore sleep architecture in autistic children (SOMELIA) 2019 [Available from: <https://clinicaltrials.gov/ct2/show/study/NCT01993251> accessed 20 September 2021.
34. ClinicalTrials.gov. Treatment of sleep disturbance in children with ASD 2021 [Available from: <https://clinicaltrials.gov/ct2/show/NCT04878198> accessed 20 September 2021.
35. Moher D, Shamseer L, Clarke M, et al. Preferred reporting items for systematic review and meta-analysis protocols (PRISMA-P) 2015 statement. *Syst Rev* 2015;4(1):1.
36. Shamseer L, Moher D, Clarke M, et al. Preferred reporting items for systematic review and meta-analysis protocols (PRISMA-P) 2015: elaboration and explanation. *BMJ* 2015;349:7647.
37. American Psychiatric Association. Diagnostic and statistical manual of mental disorders (DSM-5®). Washington DC: American Psychiatric Publishing 2013.
38. World Health Organization. International Statistical Classification of Diseases and Related Health Problems (ICD) 2021 [Available from: <https://www.who.int/standards/classifications/classification-of-diseases> accessed 16 September 2021.
39. (International Conference on Harmonisation of Technical Requirements for Registration of Pharmaceuticals for Human Use). ICH harmonised guideline: integrated addendum to ICH E6(R1): guideline for good clinical practice (ICH-GCP). 2015; Step 2 version. <https://ichgcp.net/da> (accessed 1 September, 2021).
40. Graham P, Stevenson J, Flynn D. A new measure of health-related quality of life for children: Preliminary findings. *Psychology & Health* 1997;12(5):655-65. doi: 10.1080/08870449708407412
41. Ware J, Sherbourne C. The MOS 36-item short-form health survey (SF-36). I. Conceptual framework and item selection. *Med Care* 1992;30(6):473-83.
42. Buysse DJ, Reynolds CF, Monk TH, et al. The Pittsburgh sleep quality index: A new instrument for psychiatric practice and research. *Psychiatry Res* 1989;28(2):193-213. doi: 10.1016/0165-1781(89)90047-4
43. Wehmeier PM, Schacht A, Lehmann M, et al. Emotional well-being in children and adolescents treated with atomoxetine for attention-deficit/hyperactivity disorder: findings from a patient, parent and physician perspective using items from the pediatric adverse event rating scale (PAERS). *Child Adolesc Psychiatry Ment Health* 2008;2(1):11. doi: 10.1186/1753-2000-2-11 [published Online First: 20080528]
44. Higgins J, Thomas J, Chandler J, et al. Cochrane Handbook for Systematic Reviews of Interventions: Cochrane, 2022, 2022.
45. StataCorp. Stata Statistical Software: Release 17 College Station, TX: StataCorp LLC; 2022 [cited 2020 Sep 1]. accessed 1 May 2022.
46. Copenhagen Trial Unit. TSA - Trial Sequential Analysis [Web page]. [Available from: <http://www.ctu.dk/tsa/> accessed 1 May 2022.

- 1
- 2
- 3
- 4 47. Thorlund K, Engström J, Wetterslev J, et al. User manual for trial sequential analysis (TSA).  
5 Copenhagen, Denmark: Copenhagen Trial Unit, Centre for Clinical Intervention Research,  
6 2011:1-115.
- 7
- 8 48. Covidence systematic review software VHI, Melbourne, Australia. Available at  
9 [www.covidence.org](http://www.covidence.org).
- 10 49. Page MJ, McKenzie JE, Bossuyt PM, et al. The PRISMA 2020 statement: an updated guideline  
11 for reporting systematic reviews. *BMJ* 2021;372:n71. doi: 10.1136/bmj.n71 [published  
12 Online First: 2021/03/31]
- 13 50. Storebo OJ, Pedersen N, Ramstad E, et al. Methylphenidate for attention deficit hyperactivity  
14 disorder (ADHD) in children and adolescents - assessment of adverse events in non-  
15 randomised studies. *Cochrane Database Syst Rev* 2018;5:CD012069. doi:  
16 10.1002/14651858.CD012069.pub2 [published Online First: 20180509]
- 17 51. Jakobsen JC, Gluud C, Wetterslev J, et al. When and how should multiple imputation be used  
18 for handling missing data in randomised clinical trials—a practical guide with flowcharts.  
19 *BMC Med Res Methodol* 2017;17(1):162.
- 20 52. Higgins JP, Thompson SG. Quantifying heterogeneity in a meta-analysis. *Stat Med*  
21 2002;21(11):1539-58.
- 22 53. Higgins JP, Thompson SG, Deeks JJ, et al. Measuring inconsistency in meta-analyses. *BMJ*  
23 2003;327(7414):557.
- 24 54. Harbord RM, Egger M, Sterne JA. A modified test for small-study effects in meta-analyses of  
25 controlled trials with binary endpoints. *Stat Med* 2006;25(20):3443-57.
- 26 55. Egger M, Smith GD, Schneider M, et al. Bias in meta-analysis detected by a simple, graphical  
27 test. *BMJ* 1997;315(7109):629-34.
- 28 56. Begg CB, Mazumdar M. Operating characteristics of a rank correlation test for publication bias.  
29 *Biometrics* 1994:1088-101.
- 30 57. Keus F, Wetterslev J, Gluud C, et al. Evidence at a glance: error matrix approach for  
31 overviewing available evidence. *BMC Med Res Methodol* 2010;10(1):90.
- 32 58. Jakobsen JC, Wetterslev J, Winkel P, et al. Thresholds for statistical and clinical significance in  
33 systematic reviews with meta-analytic methods. *BMC Med Res Methodol* 2014;14(1):120.
- 34 59. IntHout J, Ioannidis JPA, Borm GF. The Hartung-Knapp-Sidik-Jonkman method for random  
35 effects meta-analysis is straightforward and considerably outperforms the standard  
36 DerSimonian-Laird method. *BMC Med Res Methodol* 2014;14(1):25. doi: 10.1186/1471-  
37 2288-14-25
- 38 60. DeMets DL. Methods for combining randomized clinical trials: strengths and limitations. *Stat*  
39 *Med* 1987;6(3):341-48.
- 40 61. Fisher RA. On the interpretation of  $\chi^2$  from contingency tables, and the calculation of p. *J R*  
41 *Stat Soc* 1922;85(1) doi: 10.2307/2340521
- 42 62. Student. The probable error of a mean. *Biometrika* 1908;6(1) doi: 10.2307/2331554
- 43 63. Brok J, Thorlund K, Gluud C, et al. Trial sequential analysis reveals insufficient information  
44 size and potentially false positive results in many meta-analyses. *J Clin Epidemiol*  
45 2008;61(8):763-69.
- 46 64. Brok J, Thorlund K, Wetterslev J, et al. Apparently conclusive meta-analyses may be  
47 inconclusive—trial sequential analysis adjustment of random error risk due to repetitive  
48 testing of accumulating data in apparently conclusive neonatal meta-analyses. *Int J*  
49 *Epidemiol* 2008;38(1):287-98.
- 50 65. Copenhagen Trial Unit. Trial Sequential Analysis 2022 [Available from: <https://ctu.dk/tsa/>.  
51  
52  
53  
54  
55  
56  
57  
58  
59  
60



1  
2  
3  
4  
5  
6  
7  
8  
9  
10  
11  
12  
13  
14  
15  
16  
17  
18  
19  
20  
21  
22  
23  
24  
25  
26  
27  
28  
29  
30  
31  
32  
33  
34  
35  
36  
37  
38  
39  
40  
41  
42  
43  
44  
45  
46  
47  
48  
49  
50  
51  
52  
53  
54  
55  
56  
57  
58  
59  
60

66. Imberger G, Thorlund K, Gluud C, et al. False-positive findings in Cochrane meta-analyses with and without application of trial sequential analysis: an empirical review. *BMJ Open* 2016;6(8):e011890.
67. Thorlund K, Devereaux P, Wetterslev J, et al. Can trial sequential monitoring boundaries reduce spurious inferences from meta-analyses? *Int J Epidemiol* 2008;38(1):276-86.
68. Wetterslev J, Thorlund K, Brok J, et al. Trial sequential analysis may establish when firm evidence is reached in cumulative meta-analysis. *J Clin Epidemiol* 2008;61(1):64-75.
69. Arendt J, Skene DJ. Melatonin as a chronobiotic. *Sleep Med Rev* 2005;9(1):25-39. doi: 10.1016/j.smrv.2004.05.002
70. Khullar A. The role of melatonin in the circadian rhythm sleep-wake cycle. *Psychiatr Times* 2012;29(7):26.
71. Munday K, Benloucif S, Harsanyi K, et al. Phase-dependent treatment of delayed sleep phase syndrome with melatonin. *Sleep* 2005;28(10):1271-78. doi: 10.1093/sleep/28.10.1271
72. Guyatt GH, Oxman AD, Vist GE, et al. GRADE: an emerging consensus on rating quality of evidence and strength of recommendations. *BMJ* 2008;336(7650):924-6. doi: 10.1136/bmj.39489.470347.AD

**PRISMA-P (Preferred Reporting Items for Systematic review and Meta-Analysis Protocols) 2015 checklist: recommended items to address in a systematic review protocol\***

| Section and topic                 | Item No | Checklist item                                                                                                                                                                                                                | Section                                          |
|-----------------------------------|---------|-------------------------------------------------------------------------------------------------------------------------------------------------------------------------------------------------------------------------------|--------------------------------------------------|
| <b>ADMINISTRATIVE INFORMATION</b> |         |                                                                                                                                                                                                                               |                                                  |
| Title:                            |         |                                                                                                                                                                                                                               |                                                  |
| Identification                    | 1a      | Identify the report as a protocol of a systematic review                                                                                                                                                                      | Title                                            |
| Update                            | 1b      | If the protocol is for an update of a previous systematic review, identify as such                                                                                                                                            | N/A                                              |
| Registration                      | 2       | If registered, provide the name of the registry (such as PROSPERO) and registration number                                                                                                                                    | Abstract                                         |
| Authors:                          |         |                                                                                                                                                                                                                               |                                                  |
| Contact                           | 3a      | Provide name, institutional affiliation, e-mail address of all protocol authors; provide physical mailing address of corresponding author                                                                                     | Title page                                       |
| Contributions                     | 3b      | Describe contributions of protocol authors and identify the guarantor of the review                                                                                                                                           | Contributors                                     |
| Amendments                        | 4       | If the protocol represents an amendment of a previously completed or published protocol, identify as such and list changes; otherwise, state plan for documenting important protocol amendments                               | Differences between the protocol and the review  |
| Support:                          |         |                                                                                                                                                                                                                               |                                                  |
| Sources                           | 5a      | Indicate sources of financial or other support for the review                                                                                                                                                                 | Funding                                          |
| Sponsor                           | 5b      | Provide name for the review funder and/or sponsor                                                                                                                                                                             | Funding                                          |
| Role of sponsor or funder         | 5c      | Describe roles of funder(s), sponsor(s), and/or institution(s), if any, in developing the protocol                                                                                                                            | N/A                                              |
| <b>INTRODUCTION</b>               |         |                                                                                                                                                                                                                               |                                                  |
| Rationale                         | 6       | Describe the rationale for the review in the context of what is already known                                                                                                                                                 | Why it is important to do this review            |
| Objectives                        | 7       | Provide an explicit statement of the question(s) the review will address with reference to participants, interventions, comparators, and outcomes (PICO)                                                                      | Why it is important to do this review            |
| <b>METHODS</b>                    |         |                                                                                                                                                                                                                               |                                                  |
| Eligibility criteria              | 8       | Specify the study characteristics (such as PICO, study design, setting, time frame) and report characteristics (such as years considered, language, publication status) to be used as criteria for eligibility for the review | Criteria for considering studies for this review |
| Information sources               | 9       | Describe all intended information sources (such as electronic databases, contact with study authors, trial registers or other grey literature sources) with planned dates of coverage                                         | Search methods for identification of studies     |
| Search strategy                   | 10      | Present draft of search strategy to be used for at least one electronic database, including planned limits, such that                                                                                                         | Supplementary material 2                         |



1  
2  
3  
4  
5  
6  
7  
8  
9  
10  
11  
12  
13  
14  
15  
16  
17  
18  
19  
20  
21  
22  
23  
24  
25  
26  
27  
28  
29  
30  
31

---

it could be repeated

---

|                                    |     |                                                                                                                                                                                                                                                  |                                                                            |
|------------------------------------|-----|--------------------------------------------------------------------------------------------------------------------------------------------------------------------------------------------------------------------------------------------------|----------------------------------------------------------------------------|
| Study records:                     |     |                                                                                                                                                                                                                                                  |                                                                            |
| Data management                    | 11a | Describe the mechanism(s) that will be used to manage records and data throughout the review                                                                                                                                                     | Data collection and analysis                                               |
| Selection process                  | 11b | State the process that will be used for selecting studies (such as two independent reviewers) through each phase of the review (that is, screening, eligibility and inclusion in meta-analysis)                                                  | Selection of studies                                                       |
| Data collection process            | 11c | Describe planned method of extracting data from reports (such as piloting forms, done independently, in duplicate), any processes for obtaining and confirming data from investigators                                                           | Data extraction and management                                             |
| Data items                         | 12  | List and define all variables for which data will be sought (such as PICO items, funding sources), any pre-planned data assumptions and simplifications                                                                                          | Data extraction and management                                             |
| Outcomes and prioritization        | 13  | List and define all outcomes for which data will be sought, including prioritization of main and additional outcomes, with rationale                                                                                                             | Types of outcomes measures                                                 |
| Risk of bias in individual studies | 14  | Describe anticipated methods for assessing risk of bias of individual studies, including whether this will be done at the outcome or study level, or both; state how this information will be used in data synthesis                             | Assessment of risk of bias in included studies                             |
| Data synthesis                     | 15a | Describe criteria under which study data will be quantitatively synthesised                                                                                                                                                                      | Data synthesis                                                             |
|                                    | 15b | If data are appropriate for quantitative synthesis, describe planned summary measures, methods of handling data and methods of combining data from studies, including any planned exploration of consistency (such as $I^2$ , Kendall's $\tau$ ) | Dealing with missing data, Assessment of heterogeneity                     |
|                                    | 15c | Describe any proposed additional analyses (such as sensitivity or subgroup analyses, meta-regression)                                                                                                                                            | Subgroup analysis and investigation of heterogeneity, Sensitivity analysis |
|                                    | 15d | If quantitative synthesis is not appropriate, describe the type of summary planned                                                                                                                                                               | Unit of analysis issues                                                    |
| Meta-bias(es)                      | 16  | Specify any planned assessment of meta-bias(es) (such as publication bias across studies, selective reporting within studies)                                                                                                                    | Assessment of reporting biases                                             |
| Confidence in cumulative evidence  | 17  | Describe how the strength of the body of evidence will be assessed (such as GRADE)                                                                                                                                                               | Summary of findings and assessment of the certainty of the evidence        |

32  
33  
34  
35

**\* It is strongly recommended that this checklist be read in conjunction with the PRISMA-P Explanation and Elaboration (cite when available) for important clarification on the items. Amendments to a review protocol should be tracked and dated. The copyright for PRISMA-P (including checklist) is held by the PRISMA-P Group and is distributed under a Creative Commons Attribution Licence 4.0.**

36  
37  
38  
39  
40  
41  
42  
43  
44  
45  
46

*From: Shamseer L, Moher D, Clarke M, Ghersi D, Liberati A, Petticrew M, Shekelle P, Stewart L, PRISMA-P Group. Preferred reporting items for systematic review and meta-analysis protocols (PRISMA-P) 2015: elaboration and explanation. BMJ. 2015 Jan 2;349(jan02 1):g7647.*

**Search strategies for  
Melatonin for neurodevelopmental disorders and non-respiratory sleep disorders  
Preliminary searches prepared 3 June 2022**

**Cochrane Central Register of Controlled Trials (latest issue) in the Cochrane Library**

- #1 MeSH descriptor: [Neurodevelopmental Disorders] explode all trees
- #2 MeSH descriptor: [Central Nervous System Diseases] explode all trees
- #3 MeSH descriptor: [Intellectual Disability] explode all trees
- #4 (((neurodevelopment\* or neurotic\* or development\* or mental\* or central nervous system or cns or intellectual\* or ((disruptive or child) and behavio\*) or Communicati\* or speech\* or language or Learning or Motor\* or psychomotor or Reactive Attachment\* or Stereotypic Movement\*) and (disease\* or disorder\* or disabilit\* or syndrom\* or dysfunc\* or impair\* or deficienc\* or retardation\*)) or neurodisabilit\* or neuro-disabilit\* or idiocy or dyslexia or dyscalculia or autism\* or kaunner\* or ASD or Asperger\* or attention deficit\* or ADHD\* or ADDH or hyperactivity\* or impulsiv\* cerebral pals\* or spastic displeg\* or epilep\* or mutism\* or tic\* or Tourette\* or ((happy or child\*) and puppet\*) or fragile x or Frax\* or angelman\* or prader-willi\* or rett\* or smith-magenis or williams or Cri-du-Chat or De Lange or down\* or Coffin-Lowry or Lesch-Nyhan or Menkes Kinky Hair or Rubinstein-Taybi or WAGR or schizophreni\* or Adrenoleukodystrophy or Mucopolysaccharidosis)
- #5 #1 or #2 or #3 or #4
- #6 MeSH descriptor: [Melatonin] explode all trees
- #7 (melatonin\* or Circadin\* or Slenyto\* or (Methoxy near Acetyl near tryptamin\*))
- #8 #6 or #7
- #9 #5 and #8
- #10 MeSH descriptor: [Adolescent] explode all trees
- #11 MeSH descriptor: [Child] explode all trees
- #12 MeSH descriptor: [Infant] explode all trees
- #13 MeSH descriptor: [Pediatrics] explode all trees
- #14 (baby or babies or infan\* or child\* or toddler\* or pre-school\* or preschool\* or adolescen\* or teen\* or schoolchild\* or schoolage\* or pediatric\* or paediatric\*)
- #15 #10 or #11 or #12 or #13 or #14
- #16 #9 and #15

**MEDLINE Ovid (1946 to the date of the search)**

1. exp Neurodevelopmental Disorders/
2. exp Central Nervous System Diseases/
3. exp Intellectual Disability/
4. (((neurodevelopment\* or neurotic\* or development\* or mental\* or central nervous system or cns or intellectual\* or ((disruptive or child) and behavio\*) or Communicati\* or speech\* or language or Learning or Motor\* or psychomotor or Reactive Attachment\* or Stereotypic Movement\*) and (disease\* or disorder\* or disabilit\* or syndrom\* or dysfunc\* or impair\* or deficienc\* or retardation\*)) or neurodisabilit\* or neuro-disabilit\* or idiocy or dyslexia or dyscalculia or autism\* or kanner\* or ASD or Asperger\* or attention deficit\* or ADHD\* or ADDH or hyperactivity\* or impulsiv\* cerebral pals\* or spastic displeg\* or epilep\* or mutism\* or tic\* or Tourette\* or ((happy or child\*) and puppet\*) or fragile x or Frax\* or angelman\* or prader-willi\* or rett\* or smith-magenis or williams or Cri-du-Chat or De Lange or down\* or Coffin-Lowry or Lesch-Nyhan or Menkes Kinky Hair or Rubinstein-Taybi or WAGR or schizophreni\* or Adrenoleukodystrophy or Mucopolysaccharidosis).mp. [mp=title, abstract, original title, name of substance word, subject heading word, floating sub-heading word, keyword heading word, organism supplementary concept word, protocol supplementary concept word, rare disease supplementary concept word, unique identifier, synonyms]
5. 1 or 2 or 3 or 4
6. exp Melatonin/
7. (melatonin\* or Circadin\* or Slenyto\* or 5-Methoxy-N-Acetyltryptamin\* or N-Acetyl-5-Methoxytryptamin\*).mp. [mp=title, abstract, original title, name of substance word, subject heading word, floating sub-heading word, keyword heading word, organism supplementary concept word, protocol supplementary concept word, rare disease supplementary concept word, unique identifier, synonyms]
8. 6 or 7
9. 5 and 8
10. exp adolescent/ or exp child/ or exp infant/
11. exp Pediatrics/
12. (baby or babies or infan\* or child\* or toddler\* or pre-school\* or preschool\* or adolescen\* or teen\* or schoolchild\* or schoolage\* or pediatric\* or paediatric\*).mp. [mp=title, abstract, original title, name of substance word, subject heading word, floating sub-heading word, keyword heading word, organism supplementary concept word, protocol supplementary concept word, rare disease supplementary concept word, unique identifier, synonyms]

13. 10 or 11 or 12
14. 9 and 13
15. (randomized controlled trial or controlled clinical trial or retracted publication or retraction of publication).pt. or clinical trials as topic.sh. or trial.ti.
16. (random\* or blind\* or placebo\*).mp. [mp=title, abstract, original title, name of substance word, subject heading word, floating sub-heading word, keyword heading word, organism supplementary concept word, protocol supplementary concept word, rare disease supplementary concept word, unique identifier, synonyms]
17. 14 and (15 or 16)

#### Embase Ovid (1974 to the date of the search)

1. exp mental disease/
2. exp central nervous system disease/
3. exp intellectual impairment/
4. (((neurodevelopment\* or neurotic\* or development\* or mental\* or central nervous system or cns or intellectual\* or ((disruptive or child) and behavio\*) or Communicati\* or speech\* or language or Learning or Motor\* or psychomotor or Reactive Attachment\* or Stereotypic Movement\*) and (disease\* or disorder\* or disabilit\* or syndrom\* or dysfunc\* or impair\* or deficienc\* or retardation\*)) or neurodisabilit\* or neuro-disabilit\* or idiocy or dyslexia or dyscalculia or autis\* or kanner\* or ASD or Asperger\* or attention deficit\* or ADHD\* or ADDH or hyperactivity\* or impulsiv\* cerebral pals\* or spastic dispieg\* or epilep\* or mutism\* or tic\* or Tourette\* or ((happy or child\*) and puppet\*) or fragile x or Frax\* or angelman\* or prader-willi\* or rett\* or smith-magenis or williams or Cri-du-Chat or De Lange or down\* or Coffin-Lowry or Lesch-Nyhan or Menkes Kinky Hair or Rubinstein-Taybi or WAGR or schizophreni\* or Adrenoleukodystrophy or Mucopolysaccharidosis).mp. [mp=title, abstract, heading word, drug trade name, original title, device manufacturer, drug manufacturer, device trade name, keyword heading word, floating subheading word, candidate term word]
5. 1 or 2 or 3 or 4
6. exp melatonin/
7. (melatonin\* or Circadin\* or Slenyto\* or 5-Methoxy-N-Acetyltryptamin\* or N-Acetyl-5-Methoxytryptamin\*).mp. [mp=title, abstract, heading word, drug trade name, original title, device manufacturer, drug manufacturer, device trade name, keyword heading word, floating subheading word, candidate term word]
8. 6 or 7
9. 5 and 8
10. exp adolescent/ or exp child/
11. exp pediatrics/
12. (baby or babies or infan\* or child\* or toddler\* or pre-school\* or preschool\* or adolescen\* or teen\* or schoolchild\* or schoolage\* or pediatric\* or paediatric\*).mp. [mp=title, abstract, heading word, drug trade name, original title, device manufacturer, drug manufacturer, device trade name, keyword heading word, floating subheading word, candidate term word]
13. 10 or 11 or 12
14. 9 and 13
15. Randomized controlled trial/ or Controlled clinical trial/ or retracted article/ or (erratum or tombstone).pt. or trial.ti. or yes.ne.
16. (random\* or blind\* or placebo\*).mp. [mp=title, abstract, heading word, drug trade name, original title, device manufacturer, drug manufacturer, device trade name, keyword heading word, floating subheading word, candidate term word]
17. 14 and (15 or 16)

#### LILACS (Bireme; 1982 to the date of the search)

(((neurodevelopment\$ or neurotic\$ or development\$ or mental\$ or central nervous system or cns or intellectual\$ or ((disruptive or child) and behavio\$) or Communicati\$ or speech\$ or language or Learning or Motor\$ or psychomotor or Reactive Attachment\$ or Stereotypic Movement\$) and (disease\$ or disorder\$ or disabilit\$ or syndrom\$ or dysfunc\$ or impair\$ or deficienc\$ or retardation\$)) or neurodisabilit\$ or neuro-disabilit\$ or idiocy or dyslexia or dyscalculia or autis\$ or kanner\$ or ASD or Asperger\$ or attention deficit\$ or ADHD\$ or ADDH or hyperactivity\$ or impulsiv\$ cerebral pals\$ or spastic dispieg\$ or epilep\$ or mutism\$ or tic\$ or Tourette\$ or ((happy or child\$) and puppet\$) or fragile x or Frax\$ or angelman\$ or prader-willi\$ or rett\$ or smith-magenis or williams or Cri-du-Chat or De Lange or down\$ or Coffin-Lowry or Lesch-Nyhan or Menkes Kinky Hair or Rubinstein-Taybi or WAGR or schizophreni\$ or Adrenoleukodystrophy or Mucopolysaccharidosis) [Words] and (melatonin\$ or Circadin\$ or Slenyto\$ or 5-Methoxy-N-Acetyltryptamin\$ or N-Acetyl-5-Methoxytryptamin\$) [Words] and (baby or babies or infan\$ or child\$ or toddler\$ or pre-school\$ or preschool\$ or adolescen\$ or teen\$ or schoolchild\$ or schoolage\$ or pediatric\$ or paediatric\$) [Words]

#### PsycINFO (EBSCO Host; date will be given at review stage)

S11 S9 AND S10

1  
2  
3 S10 TX (random\* or blind\* or placebo\* or trial\*)  
4 S9 S5 AND S8  
5 S8 S6 OR S7  
6 S7 TX (melatonin\* or Circadin\* or Slenyto\* or 5-Methoxy-N-Acetyltryptamin\* or N-Acetyl-5-  
7 Methoxytryptamin\*)  
8 S6 MA Melatonin  
9 S5 S1 OR S2 OR S3 OR S4  
10 S4 TX (((neurodevelopment\* or neurotic\* or development\* or mental\* or central nervous system or cns or  
11 intellectual\* or ((disruptive or child) and behavio\*) or Communicati\* or speech\* or language or Learning or Motor\* or  
12 psychomotor or Reactive Attachment\* or Stereotypic Movement\*) and (disease\* or disorder\* or disabilit\* or syndrom\*  
13 or dysfunc\* or impair\* or deficienc\* or retardation\*)) or neurodisabilit\* or neuro-disabilit\* or idiocy or dyslexia or  
14 dyscalculia or autis\* or kanner\* or ASD or Asperger\* or attention deficit\* or ADHD\* or ADDH or hyperactivity\* or  
15 impulsiv\* cerebral pals\* or spastic dispieg\* or epilep\* or mutism\* or tic\* or Tourette\* or ((happy or child\*) and  
16 puppet\*) or fragile x or Frax\* or angelman\* or prader-willi\* or rett\* or smith-magenis or williams or Cri-du-Chat or De  
17 Lange or down\* or Coffin-Lowry or Lesch-Nyhan or Menkes Kinky Hair or Rubinstein-Taybi or WAGR or  
18 schizophreni\* or Adrenoleukodystrophy or Mucopolysaccharidosis)  
19 S3 MA Intellectual Disability  
20 S2 MA Central Nervous System Diseases  
21 S1 MA Neurodevelopmental Disorders

22 **Science Citation Index Expanded (1900 to the date of the search) and Conference Proceedings Citation Index –**  
23 **Science (1990 to the date of the search) (Web of Science)**

24 #5 #4 AND #3 AND #2 AND #1

25 #4 TI=(random\* or blind\* or placebo\* or trial\*) OR TS=(random\* or blind\* or placebo\*)

26 #3 TS=(baby or babies or infan\* or child\* or toddler\* or pre-school\* or preschool\* or adolescen\* or teen\* or  
27 schoolchild\* or schoolage\* or pediatric\* or paediatric\*)

28 #2 TS=(melatonin\* or Circadin\* or Slenyto\* or 5-Methoxy-N-Acetyltryptamin\* or N-Acetyl-5-Methoxytryptamin\*)

29 #1 TS=(((neurodevelopment\* or neurotic\* or development\* or mental\* or central nervous system or cns or intellectual\*  
30 or ((disruptive or child) and behavio\*) or Communicati\* or speech\* or language or Learning or Motor\* or psychomotor  
31 or Reactive Attachment\* or Stereotypic Movement\*) and (disease\* or disorder\* or disabilit\* or syndrom\* or dysfunc\* or  
32 impair\* or deficienc\* or retardation\*)) or neurodisabilit\* or neuro-disabilit\* or idiocy or dyslexia or dyscalculia or autis\*  
33 or kanner\* or ASD or Asperger\* or attention deficit\* or ADHD\* or ADDH or hyperactivity\* or impulsiv\* cerebral pals\*  
34 or spastic dispieg\* or epilep\* or mutism\* or tic\* or Tourette\* or ((happy or child\*) and puppet\*) or fragile x or Frax\* or  
35 angelman\* or prader-willi\* or rett\* or smith-magenis or williams or Cri-du-Chat or De Lange or down\* or Coffin-Lowry  
36 or Lesch-Nyhan or Menkes Kinky Hair or Rubinstein-Taybi or WAGR or schizophreni\* or Adrenoleukodystrophy or  
37 Mucopolysaccharidosis)

# BMJ Open

## Melatonin for sleep disorders in children with neurodevelopmental disorders: protocol for a systematic review with meta-analysis and Trial Sequential Analysis of randomised clinical trials

|                                 |                                                                                                                                                                                                                                                                                                                                                                                                                                                                                                                                                                                                                                                                                                                                                                                                                                                                                                                                                                    |
|---------------------------------|--------------------------------------------------------------------------------------------------------------------------------------------------------------------------------------------------------------------------------------------------------------------------------------------------------------------------------------------------------------------------------------------------------------------------------------------------------------------------------------------------------------------------------------------------------------------------------------------------------------------------------------------------------------------------------------------------------------------------------------------------------------------------------------------------------------------------------------------------------------------------------------------------------------------------------------------------------------------|
| Journal:                        | <i>BMJ Open</i>                                                                                                                                                                                                                                                                                                                                                                                                                                                                                                                                                                                                                                                                                                                                                                                                                                                                                                                                                    |
| Manuscript ID                   | bmjopen-2022-065520.R2                                                                                                                                                                                                                                                                                                                                                                                                                                                                                                                                                                                                                                                                                                                                                                                                                                                                                                                                             |
| Article Type:                   | Protocol                                                                                                                                                                                                                                                                                                                                                                                                                                                                                                                                                                                                                                                                                                                                                                                                                                                                                                                                                           |
| Date Submitted by the Author:   | 14-Nov-2022                                                                                                                                                                                                                                                                                                                                                                                                                                                                                                                                                                                                                                                                                                                                                                                                                                                                                                                                                        |
| Complete List of Authors:       | Jørgensen, Caroline Kamp; Rigshospitalet Copenhagen Trial Unit; Syddansk Universitet Det Sundhedsvidenskabelige Fakultet, Department of Regional Health Research<br>Hermann, Rikke; Centre for children, youth, and families<br>Juul, Sophie ; Rigshospitalet Copenhagen Trial Unit<br>Faltermeier, Pascal; MSH Medical School Hamburg<br>Horowitz, Mark; University College London Division of Psychiatry; North East London NHS Foundation Trust, Research and Development Department<br>Moncrieff, Joanna; University College London Division of Psychiatry; North East London NHS Foundation Trust, Research and Development Department<br>Gluud, Christian; Rigshospitalet Copenhagen Trial Unit; Syddansk Universitet Det Sundhedsvidenskabelige Fakultet, Department of Regional Health Research<br>Jakobsen, Janus; Rigshospitalet Copenhagen Trial Unit; Syddansk Universitet Det Sundhedsvidenskabelige Fakultet, Department of Regional Health Research |
| <b>Primary Subject Heading</b>: | Paediatrics                                                                                                                                                                                                                                                                                                                                                                                                                                                                                                                                                                                                                                                                                                                                                                                                                                                                                                                                                        |
| Secondary Subject Heading:      | Neurology                                                                                                                                                                                                                                                                                                                                                                                                                                                                                                                                                                                                                                                                                                                                                                                                                                                                                                                                                          |
| Keywords:                       | SLEEP MEDICINE, Paediatric neurology < NEUROLOGY, Developmental neurology & neurodisability < PAEDIATRICS                                                                                                                                                                                                                                                                                                                                                                                                                                                                                                                                                                                                                                                                                                                                                                                                                                                          |
|                                 |                                                                                                                                                                                                                                                                                                                                                                                                                                                                                                                                                                                                                                                                                                                                                                                                                                                                                                                                                                    |

SCHOLARONE™  
Manuscripts

# Melatonin for sleep disorders in children with neurodevelopmental disorders: protocol for a systematic review with meta-analysis and Trial Sequential Analysis of randomised clinical trials

Caroline Kamp Jørgensen<sup>1,2\*</sup>, Rikke Hermann<sup>1,3</sup>, Sophie Juul<sup>1</sup>, Pascal Faltermeier<sup>4</sup>, Mark Horowitz<sup>5,6</sup>, Joanna Moncrieff<sup>5,6</sup>, Christian Glud<sup>1,2</sup>, Janus Christian Jakobsen<sup>1,2</sup>

## Contact information

\* Corresponding author: Caroline Kamp Jørgensen: [caroline.joergensen@ctu.dk](mailto:caroline.joergensen@ctu.dk)  
Copenhagen Trial Unit, Copenhagen University Hospital – Rigshospitalet, Blegdamsvej 9, DK-2100 Copenhagen Ø, Denmark

## Affiliations:

<sup>1</sup> Copenhagen Trial Unit, Centre for Clinical Intervention Research, Capital Region of Denmark, Copenhagen University Hospital – Rigshospitalet, Copenhagen, Denmark

<sup>2</sup> Department of Regional Health Research, Faculty of Health Sciences, University of Southern Denmark, Odense, Denmark

<sup>3</sup> Centre for children, youth, and families, Glostrup Municipality, Denmark

<sup>4</sup> MSH Medical School Hamburg, University of Applied Sciences and Medical University, Hamburg, Germany

<sup>5</sup> Division of Psychiatry, University College London, London, UK

<sup>6</sup> Research and Development Department, North East London NHS Foundation Trust (NELFT), London, UK

**Word count:** 4,266

# Abstract

**Introduction:** Neurodevelopmental disorders are a group of disorders thought to be associated with the functioning of the brain and nervous system. Children with neurodevelopmental disorders often have sleep-related comorbidities that may negatively affect quality of life for both the children and their families. Melatonin is one of the most used interventions in children with neurodevelopmental disorders and sleep disorders. Previous reviews have investigated the effects of melatonin for sleep disorders in children with neurodevelopmental disorders, but these had important limitations, such as inadequate analysis of adverse effects, small sample sizes, and short follow-up.

**Methods and analysis:** This is a protocol for a systematic review with meta-analysis and Trial Sequential Analysis of randomised clinical trials. The protocol is reported in accordance with Preferred Reporting Items for Systematic Reviews and Meta-Analysis Protocols. We will search for published and unpublished trials in the Cochrane Central Register of Controlled Trials, MEDLINE Ovid, Embase Ovid, LILACS, Science Citation Index Expanded, Conference Proceedings Citation Index-Science, PsycINFO, ClinicalTrials.gov, and the International Clinical Trials Registry Platform. We will search the databases from their inception without language restrictions. We will also request clinical study reports from regulatory authorities and pharmaceutical companies. Review authors working in pairs will screen reports, extract data, and conduct risk of bias assessments using the Cochrane Risk of Bias tool. We will include randomised clinical trials comparing melatonin versus placebo or no intervention for sleep disorders in children with neurodevelopmental disorders. Primary outcomes will be total sleep time and adverse effects. Secondary outcomes will be quality of life of the child and caregivers and sleep onset latency. Data will be analysed using random-effects and fixed-effect meta-analyses. Certainty of evidence will be assessed with GRADE.

**Ethics and dissemination:** Ethical approval was not required for this protocol. The systematic review will be published in a peer-reviewed journal.

**PROSPERO registration number:** CRD42022337530

**Keywords:** Melatonin; neurodevelopmental disorders; sleep disorders; children; systematic review



1  
2  
3  
4  
5  
6  
7  
8  
9  
10  
11  
12  
13  
14  
15  
16  
17  
18  
19  
20  
21  
22  
23  
24  
25  
26  
27  
28  
29  
30  
31  
32  
33  
34  
35  
36  
37  
38  
39  
40  
41  
42  
43  
44  
45  
46  
47  
48  
49  
50  
51  
52  
53  
54  
55  
56  
57  
58  
59  
60

## Strengths and limitations of this study

- The methodology of our systematic review is predefined in detail to avoid data-driven biased results.
- The protocol is based on the Cochrane Handbook, the eight-step procedure suggested by Jakobsen et al., Trial Sequential Analysis, and the Grading of Recommendations, Assessment, Development and Evaluation approach.
- The systematic review will consider the risks of random errors, systematic errors, publication bias, heterogeneity, and external validity.
- The systematic review will include both published and unpublished trials.
- We assess multiple outcomes and subgroup analyses which increases the risks of type I errors.

peer review only

# Introduction

## Description of the condition

Neurodevelopmental disorders are a group of disorders thought to be associated with the functioning of the brain and nervous system.[1] Neurodevelopmental disorders are usually diagnosed in childhood and include neurological disorders such as cerebral palsy, epilepsy, Angelman syndrome, Down's syndrome, Fragile X syndrome, Prader-Willi syndrome, Rett syndrome, Smith-Magenis syndrome, Williams syndrome, and non-specific intellectual disability, along with some psychiatric disorders including autism spectrum disorder, attention deficit hyperactivity disorder (ADHD), and attention deficit disorder (ADD).[1, 2] Children with neurodevelopmental disorders may experience difficulties with learning, attention, behaviour, speech, motor skills, and other neurological functions.[1]

The impact of sleep disturbances was recently ranked as a top 10 research priority within the topics of children with neurodevelopmental disorders by a UK partnership of patients, carers, and clinicians.[3] Children with neurodevelopmental disorders often have sleep-related comorbidities, including sleep disorders such as insomnia disorder, hypersomnolence disorder, narcolepsy, breathing-related sleep disorders, circadian rhythm sleep disorders, rapid eye movement (REM) sleep arousal disorders, non-REM sleep arousal disorders, and nightmare disorders.[2, 4] Studies have shown the prevalence of comorbid neurodevelopmental disorders and sleep disorders is between 25% to 86% compared to 1% to 6% in the general paediatric population.[4-8] Sleep disorders may further enhance problems with learning and behaviour in children with neurodevelopmental disorders,[4-8] and often have a negative effect on quality of life for both the children and their families.[9, 10]

## Description of the intervention

Melatonin is a naturally occurring hormone in both humans and animals.[11] Previously, melatonin was derived from animal pineal tissue,[11] but it is now developed synthetically and distributed in different forms, including capsules, tablets, gummies, and liquids.[12] Melatonin is available in many countries either sold as prescription-only medicine or as over-the-counter medicine to treat

1  
2  
3  
4 sleep disorders in both children and adults, as it is hypothesised to be associated with few adverse  
5 effects.[11, 13] Furthermore, melatonin is one of the most commonly used interventions in children  
6 with neurodevelopmental disorders and sleep disorders.[14-18] The dosage recommendations vary  
7 according to country, but the UK National Health Service currently recommend treatment up to 13  
8 weeks of 2 mg one to two hours before bedtime for adults with sleep problems.[19] However, there  
9 are currently no clear guidelines for prescribing melatonin for children and adolescents with  
10 neurodevelopmental disorders.[5, 11]  
11  
12  
13  
14  
15  
16  
17  
18

## 19 **How the intervention might work**

20  
21  
22 The understanding of melatonin's underlying mechanisms has previously been extrapolated from  
23 animals to humans, but the exact physiological mechanisms of melatonin in humans remain  
24 unclear.[20-22] Melatonin is a neurohormone primarily secreted by the pineal gland.[13] Melatonin  
25 mediates dark signals, since the secretion of melatonin is related to darkness, and it is therefore  
26 associated with the circadian rhythm in humans.[13, 17] The secretion of melatonin is regulated by  
27 the suprachiasmatic nucleus in the hypothalamus, and the production of melatonin depends on  
28 darkness, as the exposure to light inhibits secretion.[11, 23] A decrease in the secretion of melatonin  
29 has been associated with aging and different diseases, and synthetic melatonin may theoretically  
30 reduce sleep disturbance related to melatonin deficiency.[13, 24] Previous studies have shown that  
31 melatonin improves total sleep time, sleep onset latency, and sleep quality for adults with sleep  
32 disorders, but the effects seem small.[13, 25] Furthermore, some studies suggest that children with  
33 autistic spectrum disorders have abnormal secretions of melatonin.[6, 26, 27] For these theoretical  
34 reasons, children with neurodevelopmental disorders may benefit from melatonin.  
35  
36  
37  
38  
39  
40  
41  
42  
43  
44  
45  
46  
47

## 48 **Why it is important to do this review**

49  
50 A systematic review published in 2018 investigated the effects of melatonin for sleep problems in  
51 children with neurodevelopmental disorders.[5] The review concluded that melatonin was safe and  
52 effective in improving sleep for children with neurodevelopmental disorders.[5] Another systematic  
53 review published in 2019 investigated the effects of oral melatonin for non-respiratory sleep  
54 disturbances in children with neurodisabilities.[28] The review concluded that there was some  
55 evidence of beneficial effects, but the extent of these effects was unclear due to the poor quality of  
56  
57  
58  
59  
60

1  
2  
3  
4 the evidence.[28] The review also concluded that melatonin was well-tolerated, as comparable  
5 adverse effects were found in the melatonin and placebo groups.[28]  
6  
7  
8

9 These previous reviews had important limitations. The conclusions were affected by a high degree  
10 of heterogeneity, high and unclear risk of bias in the included trials, and small sample sizes.[5, 28]  
11 Furthermore, the duration of treatment was limited to a maximum of 13 weeks, and adverse events  
12 were not adequately reported or analysed in either of the reviews.[5, 28]  
13  
14  
15  
16

17  
18 In recent studies, it has been questioned whether higher levels of melatonin are associated with  
19 delayed puberty, and other adverse effects of melatonin are also theoretically possible.[29-31] In  
20 2021, a two-year follow-up of a trial investigating the treatment with melatonin in 119 children with  
21 autism spectrum disorder was published.[32] This trial concluded that melatonin was safe and  
22 effective for long-term treatment in children.[32] Other, new randomised clinical trials might have  
23 been published since the last published systematic reviews, and on-going trials have been identified  
24 on ClinicalTrials.gov.[33, 34] These trials may contribute important information about the use of  
25 melatonin in children with neurodevelopmental disorders, including adverse effects. Therefore,  
26 there is a need for a systematic review to shed light on this important topic and to assess whether  
27 the beneficial effects outweigh any harmful effects. Our systematic review will take risks of  
28 systematic errors ('bias'), risks of random errors ('play of chance'), and the certainty of the evidence  
29 into consideration when assessing the effects of melatonin for sleep disorders in children with  
30 neurodevelopmental disorders.  
31  
32  
33  
34  
35  
36  
37  
38  
39  
40  
41  
42  
43

## 44 **Methods and analysis**

45  
46 The present protocol has been registered in the PROSPERO database (CRD42022337530) and is  
47 reported according to the guidance suggested in the Preferred Reporting Items for Systematic  
48 Reviews and Meta-Analysis Protocols (PRISMA-P) statement (please find the checklist in  
49 **supplemental material 1**).[35, 36]  
50  
51  
52  
53  
54  
55

## 56 **Criteria for considering studies for this review**

57  
58  
59  
60

## Types of studies

We will include randomised clinical trials irrespective of trial design (including crossover trials), setting, publication status, publication year, and language. We will use online translation services to translate foreign abstracts and reach out to our international colleagues (who will be thanked in the acknowledgements) for help with data extraction of relevant trials. We will not include quasi-randomised trials, cluster-randomised trials, or observational studies.

## Types of participants

We will include trials randomising children and adolescents (below 18 years of age) with neurodevelopmental disorders, such as cerebral palsy, epilepsy, Angelman syndrome, Down's syndrome, Fragile X syndrome, Prader-Willi syndrome, Rett syndrome, Smith-Magenis syndrome, Williams syndrome, non-specific intellectual disability, autism spectrum disorder, ADHD, and ADD.[1, 2] Trials will be included if the disorders of the participants are diagnosed by standardised diagnostic criteria, such as the Diagnostic and Statistical Manual of Mental Disorders[37] or International Classification of Diseases[38] or where the diagnosis or designation of neurodevelopmental disorder is made by a clinician. The participants also need to have a diagnosis of any type of sleep disorder (as defined by trialists), such as insomnia disorder, hypersomnolence disorder, narcolepsy, breathing-related sleep disorder, circadian rhythm sleep disorders, REM sleep arousal disorder, non-REM sleep arousal disorder, and nightmare disorders.

We will include participants irrespective of sex, comorbidities, demographic factors, the stage of their condition, and the care setting. If a trial reports data where only a subset of participants is eligible (e.g. a combination of children and adults), we will only include data from those participants that fulfil the inclusion criteria, and we will therefore require subset data for the specific group to be available.

## Types of interventions

We will include trials where participants in the experimental group are given melatonin at any dose, form (e.g. tablet, capsules, gummies, liquids), duration of administration, type of administration (e.g. oral), timing of administration, and setting. We will include trials where participants receive a

1  
2  
3  
4 co-intervention (e.g. pharmacological interventions, such as methylphenidate, or non-  
5 pharmacological interventions, such as exercise), providing it is delivered equally (in any aspect,  
6 e.g. same dose, equal subset of population receiving co-intervention, etc.) in the experimental group  
7 and the control group.  
8  
9  
10  
11  
12

## 13 **Comparators**

14  
15  
16 As control intervention we will accept placebo or 'no intervention'.  
17  
18  
19  
20

## 21 **Types of outcome measures**

### 22 **Primary outcomes**

- 23  
24  
25  
26  
27 1) Total sleep time (in minutes using any type of measurement, e.g. polysomnography,  
28 actigraphy, self-report, or parent-report).  
29  
30 2) Adverse effects  
31  
32 a) The proportion of participants with one or more serious adverse events. We will use the  
33 International Conference on Harmonisation of technical requirements for registration of  
34 pharmaceuticals for human use—Good Clinical Practice (ICH-GCP) definition of a serious  
35 adverse event, which is any untoward medical occurrence that resulted in death, was life-  
36 threatening, required hospitalisation or prolonging of existing hospitalisation, resulted in  
37 persistent or significant disability or jeopardised the participant.[39] If the trialists do not use  
38 the ICH-GCP definition, we will include the data if the trialists use the term 'serious adverse  
39 event'. If the trialists do not use the ICH-GCP definition nor use the term serious adverse  
40 event, then we will also include the data provided the event clearly fulfils the ICH-GCP  
41 definition for a serious adverse event. We will secondly analyse each type of serious adverse  
42 event separately.  
43  
44 b) The proportion of participants with one or more non-serious adverse events (any adverse  
45 event not classified as serious). We will also analyse each type of adverse event separately.  
46  
47  
48  
49  
50  
51  
52  
53  
54

### 55 **Secondary outcomes**

- 1) Quality of life of the child (any valid continuous scale, e.g. Child Quality of Life Questionnaire).[40]
- 2) Quality of life of the parents/caregivers (any valid continuous scale, e.g. SF-36).[41]
- 3) Sleep onset latency (in minutes using any type of measurement, e.g. polysomnography, actigraphy, self-report, or parent-report).

### **Exploratory outcomes**

- 1) Quality of sleep (any valid continuous scale), such as the Pittsburgh Sleep Quality Index.[42]
- 2) Delayed puberty or any reports of hormonal changes.
- 3) Any continuous scale assessing adverse effects (e.g. Pediatric Adverse Event Rating Scale).[43]

### **Timing of outcome assessment**

We will include outcome data recorded at the end of the treatment period primarily and at maximum follow-up secondarily.

## **Search methods for identification of studies**

### **Electronic searches**

We will search the following:

- Cochrane Central Register of Controlled Trials (CENTRAL; current issue) in The Cochrane Library
- MEDLINE Ovid (1946 onwards)
- Embase Ovid (1974 onwards)
- LILACS (Latin American and Caribbean Health Science Information database; 1982 onwards)
- Science Citation Index Expanded (Web of Science; 1964 onwards)
- Conference Proceedings Citation Index-Science (Web of Science; 1990 onwards)
- PsycINFO (1967 onwards)
- ClinicalTrials.gov
- International Clinical Trials Registry Platform (ICTRP)



1  
2  
3  
4  
5  
6 Please see **supplemental material 2** for the search strategy.  
7  
8  
9

## 10 **Searching other resources**

11  
12  
13 We will check reference lists of all included trials and any relevant systematic reviews to identify  
14 additional trials. We will also search for errata and retraction statements for the included trials. We  
15 will search websites of pharmaceutical companies (e.g. Natrol, Neurim Pharmaceuticals, Takeda  
16 Pharma), websites of U.S. Food and Drug Administration (FDA) and European Medicines Agency  
17 (EMA) to identify relevant trials. We will request FDA, EMA, and national medicines agencies to  
18 provide all publicly releasable information about relevant studies that were submitted for marketing  
19 approval, including clinical study reports. We will contact authors of eligible trials and other experts  
20 to identify any relevant trials (published or unpublished).  
21  
22  
23  
24  
25  
26  
27  
28  
29

## 30 **Data collection and analysis**

31  
32 We will perform and report the review based on the recommendations in the Cochrane Handbook  
33 for Systematic Reviews of Interventions. [44] Analyses will be performed using Stata version  
34 17[45] and Trial Sequential Analysis.[46, 47]  
35  
36  
37  
38  
39

## 40 **Selection of studies**

41  
42  
43 Two review authors will independently screen titles and abstracts using Covidence.[48] We will  
44 mark articles that clearly do not meet the eligibility criteria as excludes, while potentially eligible  
45 articles will go through to the next phase. We will retrieve all relevant full-text study  
46 reports/publications, and two review authors will independently screen the full text to identify and  
47 record reasons for exclusion of the ineligible trials. The two review authors will resolve any  
48 disagreement through discussion, or, if required, they will consult with a third author (JCJ). We will  
49 illustrate the selection process of the trials in a PRISMA flow diagram.[49] If multiple reports are  
50 available for a single trial, all reports will be grouped under a single reference ID.  
51  
52  
53  
54  
55  
56  
57  
58  
59  
60

## Data extraction and management

Review authors in pairs will independently extract data from the included trials using a pilot tested data extraction form. Disagreements will be resolved through internal discussion or, if required, by discussion with a third author (JCJ). The two review authors will assess all publications of a trial together to evaluate all available data simultaneously. We will contact trial authors by email to obtain any additional data, which may not have been reported sufficiently in the publication. We will extract the following data:

- Methods: trial setting, trial location, trial design, trial duration, duration of follow-ups, date of the trial, estimation of sample size, inclusion criteria, and exclusion criteria
- Participants: number randomised, number analysed for each outcome, number lost to follow-up, age (mean and standard deviation), sex ratio, and diagnostic criteria
- Interventions: type, dose, timing, and duration of intervention
- Control: type, dose, timing, and duration of comparison
- Co-intervention: type, dose, timing, and duration of co-interventions
- Outcomes: primary, secondary, and exploratory outcomes at the reported time points
- Notes: trial funding and conflicts of interest of the trial authors

One review author will transfer the data to Stata. We will double-check the data by comparing the data presented in the review to the data extraction form.

## Assessment of risk of bias in included studies

Our bias risk assessment will be based on the Cochrane Risk of Bias tool—version 2 (RoB 2) as recommended in the Cochrane Handbook of Systematic Reviews of Interventions.[44] We will evaluate the methodology in respect of the following bias domains:

- Bias arising from the randomisation process
- Bias due to deviations from the intended interventions (effect of assignment to intervention).
- Bias due to missing outcome data
- Bias in measurement of the outcome
- Bias in selection of the reported result

1  
2  
3  
4 Review authors in pairs will independently assess the risk of bias using a template (available  
5 at <https://www.riskofbias.info/>). Disagreements will be resolved through internal discussion or, if  
6 required, by discussion with a third author (JCJ). We will use the signalling questions in the RoB 2  
7 tool to rate each domain at either 'low risk of bias', 'some concerns', or 'high risk of bias'. We will  
8 assess all domains of risk of bias for each outcome in each trial. The overall risk of bias of a result  
9 will be judged to be low if all domains are assessed at low risk of bias. If one or more domains are  
10 assessed at either some concerns or high risk of bias, the overall risk of bias will be assessed at  
11 high. We will assess the risk of bias for the outcomes of the included trials presented in the  
12 'Summary of findings' table (primary and secondary outcomes at end of treatment). The risk of bias  
13 assessments will be illustrated in a table (using <https://www.riskofbias.info/>), and the assessments  
14 will be used to conduct subgroup analyses. The risk of bias assessment will also be used to inform  
15 the Grading of Recommendations, Assessment, Development and Evaluation (GRADE) and the  
16 'Summary of findings' table. For trials using crossover design, only data from the first period will be  
17 assessed.  
18  
19  
20  
21  
22  
23  
24  
25  
26  
27  
28  
29  
30

## 31 **Measures of treatment effect**

### 32 **Continuous outcomes**

33 We will calculate mean differences (MDs) and consider calculating standardised mean differences  
34 (SMD) with 95% CIs for continuous outcomes. We will enter data presented as a scale with a  
35 consistent direction of effect. We will primarily analyse scores assessed at single time points. If  
36 only changes from baseline scores are reported, we will analyse the results together with follow-up  
37 scores for MD (not for SMD).[44] If standard deviations (SDs) are not reported, we will calculate  
38 the SDs using trial data, if possible, or request such data from the authors.  
39  
40  
41  
42  
43  
44  
45  
46  
47

### 48 **Dichotomous outcomes**

49 We will calculate risk ratios (RRs) with 95% confidence intervals (CI) for dichotomous outcomes.  
50  
51  
52  
53

### 54 **Unit of analysis issues**

55 We will only include randomised clinical trials. Trials using a crossover design will be treated as  
56 parallel trials, since only data from the first period will be included.[44] Where multiple trial arms  
57  
58  
59  
60

1  
2  
3  
4  
5  
6  
7  
8  
9  
10  
11  
12  
13  
14  
15  
16  
17  
18  
19  
20  
21  
22  
23  
24  
25  
26  
27  
28  
29  
30  
31  
32  
33  
34  
35  
36  
37  
38  
39  
40  
41  
42  
43  
44  
45  
46  
47  
48  
49  
50  
51  
52  
53  
54  
55  
56  
57  
58  
59  
60

are reported in a single trial, we will include only the relevant arms. For trials with multiple relevant experimental or control groups, we will combine the groups as appropriate.[44]

### **Dealing with missing data**

We will, as the first option, contact all trial authors to obtain information on missing data (i.e. for data extraction and for assessment of risk of bias, as specified above). We will use intention-to-treat data if provided by the trialists.[50]

### **Dichotomous outcomes**

We will not impute missing values for any outcomes in our primary analysis. In our sensitivity analyses (see below), we will impute data.

### **Continuous outcomes**

We will not impute missing values for any outcomes in our primary analysis. In our sensitivity analysis (see below) for continuous outcomes, we will impute data.

### **Assessment of heterogeneity**

We will investigate forest plots to visually assess for signs of heterogeneity. We will also estimate the presence of statistical heterogeneity by a  $\chi^2$  test (threshold  $P < 0.05$ ) and measure the quantities of heterogeneity by the  $I^2$  statistic.[51, 52] We will investigate possible heterogeneity through subgroup analyses. We may ultimately decide that a meta-analysis should be avoided.[44] We will interpret  $I^2$  heterogeneity as suggested by the Cochrane Handbook for Systematic Reviews of Interventions.[44] If we identify substantial heterogeneity ( $I^2 > 50\%$ ), we will report it, and explore the possible causes by prespecified subgroup analyses. We will carefully investigate trial characteristics and report if we find unexpected heterogeneity due to clinical or methodological factors. Ultimately it will be decided if meta-analysis should be avoided.

### **Assessment of reporting biases**

1  
2  
3  
4 We will use funnel plots to assess reporting bias if ten or more trials are included in an  
5 outcome.[44] We will visually inspect funnel plots to assess the risk of small trial effects that could  
6 potentially reflect publication bias. We are aware of the limitations of a funnel plot (i.e. a funnel  
7 plot assesses bias due to small sample size). From this information, we will assess possible risk of  
8 publication bias. For dichotomous outcomes, we will test asymmetry with the Harbord test[53] if  
9  $\tau^2$  is less than 0.1 and with the R ucker test if  $\tau^2$  is more than 0.1. For continuous outcomes, we will  
10 use the regression asymmetry test[54] and the adjusted rank correlation.[55]  
11  
12  
13  
14  
15  
16  
17  
18

## 19 **Data synthesis**

### 20 **Meta-analysis**

21  
22 We will undertake this meta-analysis according to the recommendations stated in the Cochrane  
23 Handbook for Systematic Reviews of Interventions,[44] Keus et al.,[56] and our eight-step  
24 procedure suggested by Jakobsen et al.[57] We will assess our intervention effects with both  
25 random-effects meta-analyses (Hartung-Knapp-Sidik-Jonkman)[58] and fixed-effect meta-analyses  
26 (Mantel-Haenszel for dichotomous outcomes and inverse variance for continuous outcomes),[44,  
27 59] and report both meta-analysis results.[57] We will primarily report the most conservative result  
28 (widest confidence interval and highest P value), and report the less conservative result as a  
29 sensitivity analysis.[57] As two primary outcomes are specified, we will consider a P value of 0.025  
30 or less as the threshold for statistical significance for all outcomes.[57] Our primary analyses will  
31 include all trials. Where data are only available from one trial, we will use Fisher's exact test for  
32 dichotomous data and Student's t-test for continuous data.[60, 61]  
33  
34  
35  
36  
37  
38  
39  
40  
41  
42  
43

### 44 **Trial Sequential Analysis**

45 Traditional meta-analysis runs the risk of random errors due to sparse data and repetitive testing of  
46 accumulating data when updating reviews. We wish to control for the risks of type I and type II  
47 errors. We will therefore perform Trial Sequential Analysis on all outcomes, in order to calculate  
48 the required information size (i.e. the number of participants needed in a meta-analysis to detect or  
49 reject a certain intervention effect) and the cumulative Z-curve's breach of relevant trial sequential  
50 monitoring boundaries.[47, 62-67] A more detailed description of Trial Sequential Analysis can be  
51 found in the manual[47] and at [www.ctu.dk/tsa/](http://www.ctu.dk/tsa/). For dichotomous outcomes, we will estimate the  
52 required information size based on the observed proportion of patients with an outcome in the  
53  
54  
55  
56  
57  
58  
59  
60

control group (the cumulative proportion of patients with an event in the control groups relative to all patients in the control groups), a relative risk reduction or a relative risk increase of 25%, an alpha of 2.5% for all our outcomes, a beta of 10%, and the observed diversity as suggested by the trials in the meta-analysis. For continuous outcomes, we will use the observed standard deviation (SD) in the control group, a mean difference of 30 minutes when assessing total sleep time; otherwise, a mean difference of the observed SD/2, an alpha of 2.5% for all outcomes, a beta of 10%, and the observed diversity of the trials in the meta-analysis. We will only use the diversity-adjusted required information size (DARIS) for random-effects Trial Sequential Analyses.

### **Subgroup analysis and investigation of heterogeneity**

We will perform the following subgroup analyses on the primary outcomes:

1. Type of neurodevelopmental disorder: this subgroup analysis will assess whether the effects of melatonin are different depending on the neurodevelopmental disorder of the child.
2. Age (below 12 years compared to above 12 years and preschool-age children compared to school-age children (as defined by trialists)): this will assess whether the effects of melatonin vary depending on the age of the participants.
3. Type of comparator (placebo or no intervention): this subgroup analysis will assess whether the effects of melatonin vary depending on the comparator.
4. Timing of the melatonin administration. If data are available, we will use the following comparisons: < 2 hours before bedtime, 2-4 hours before bedtime, or 4-8 hours before bedtime. If not, we will use definitions by trialists. This subgroup analysis is relevant, because the timing of administration may affect the outcomes.[68-70]
5. Formulation of medication: this subgroup analysis will assess whether the effects of melatonin vary depending on the formulation of melatonin.
6. Type of sleep disorder: this subgroup analysis will assess whether the effects of melatonin vary depending on the type of sleep disorder.
7. Trials at high risk of bias compared to trials at low risk of bias: this subgroup analysis will assess whether the effects of melatonin vary depending on the risk of bias of the included trials.
8. Duration of trials: this subgroup analysis will assess whether the effects of melatonin vary depending on the duration of the included trials.

1  
2  
3  
4  
5  
6 Post-hoc subgroup analyses might be warranted if unexpected clinical or statistical heterogeneity is  
7 identified during the analysis of the review results.[57] We will disclose any new subgroup analyses  
8 not reported in this protocol in the 'Differences between protocol and review' section of the  
9 systematic review.  
10  
11  
12  
13  
14  
15

## 16 **Sensitivity analysis**

17  
18 To assess the potential impact of the missing data, we will perform the two following sensitivity  
19 analyses on the primary outcomes:  
20  
21  
22

23 'Best-worst-case' scenario: we will assume that all participants lost to follow-up in the experimental  
24 group had beneficial outcomes (no serious adverse events/improved quality of sleep defined as the  
25 group mean plus two SDs).[57] We will accordingly assume that all participants lost to follow-up in  
26 the control group had poor outcomes (serious adverse events/deteriorated quality of sleep defined as  
27 the group mean plus two SDs).[57]  
28  
29  
30  
31  
32

33 'Worst-best-case' scenario: we will assume that all participants lost to follow-up in the experimental  
34 group had poor outcomes (serious adverse events/deteriorated quality of sleep defined as the group  
35 mean plus two SDs).[57] We will accordingly assume that all participants lost to follow-up in the  
36 control group had beneficial outcomes (no serious adverse events/improved quality of sleep defined  
37 as the group mean plus two SDs).[57]  
38  
39  
40  
41  
42  
43

44 We will present the results of both scenarios in our review.  
45  
46

47 We will assess the potential impact of missing SDs for quality of sleep as follows: when SDs are  
48 missing, and it is not possible to calculate them, we will impute SDs from trials with similar  
49 populations and low risk of bias. If we find no such trials, we will impute SDs from trials with a  
50 similar population. As the final option, we will impute SDs from all trials. We will present results  
51 of this scenario in our review.  
52  
53  
54  
55  
56  
57  
58  
59  
60



## Summary of findings and assessment of the certainty of the evidence

Review authors in pairs will use GRADE to assess the certainty of the body of evidence associated with each of the primary and secondary outcomes at end of treatment in our review. We will construct 'Summary of findings' tables using the GRADEpro GDT.[71] The GRADE approach appraises the certainty of a body of evidence based on the extent to which one can be confident that an estimate of effect or association reflects the item being assessed. We will assess the GRADE levels of evidence as either high, moderate, low, or very low certainty on the following quality measures: risk of bias (the overall risk of bias will be used for each outcome), directness of the evidence, heterogeneity of the data, precision of effect estimates (assessed by Trial Sequential Analysis), and risk of publication bias.[71] We will downgrade the evidence by one or two levels due to serious or very serious issues. We will downgrade imprecision in GRADE by two levels if the accrued number of participants is below 50% of the DARIS, and one level if between 50 and 100% of DARIS. We will not downgrade if the cumulative Z-curve crosses the monitoring boundaries for benefit, harm, or futility, or DARIS is reached. Two review authors will assess the certainty of evidence independently and decide on downgrading. If no agreement can be reached, a third review author (JCJ) will resolve the discussion. We will justify all decisions to downgrade the certainty of evidence using footnotes, and we will make comments to aid the reader's understanding of the review where necessary. The 'Summary of findings' table will also report the anticipated absolute effects, relative effects, number of participants, type of participants, and setting.

## Differences between the protocol and the review

We will conduct the review according to this published protocol and report any deviations from it in the “differences between the protocol and the review” section of the systematic review.

## Patient and public involvement

None.

## Ethics and dissemination

Ethical approval was not required for this protocol and systematic review. The results of the systematic review will be published in a peer-reviewed journal to help inform future research and clinical practice.

## Acknowledgements

We thank Sarah Louise Klingenberg (Information Specialist, The Cochrane Hepato-Biliary Group, Copenhagen Trial Unit, Centre for Clinical Intervention Research, Copenhagen University Hospital - Rigshospitalet, Denmark) for the help with developing the search strategy.

## Contributors

CKJ, RH, SJ, PF, MH, JM, CG, and JCJ contributed to the conceptualisation and design of the study. CKJ and JCJ wrote the original draft. All authors commented and approved the final manuscript. JCJ is the guarantor of the review.

## Funding

This research received no specific grant from any funding agency in the public, commercial or not-for-profit sectors.

## Competing interests

None declared.

## References

1. United States Environmental Protection Agency. Neurodevelopmental Disorders 2015 [Available from: [https://www.epa.gov/sites/default/files/2015-10/documents/ace3\\_neurodevelopmental.pdf](https://www.epa.gov/sites/default/files/2015-10/documents/ace3_neurodevelopmental.pdf) accessed 16 September 2021.
2. Morris-Rosendahl DJ, Crocq MA. Neurodevelopmental disorders-the history and future of a diagnostic concept. *Dialogues Clin Neurosci* 2020;22(1):65-72. doi: 10.31887/DCNS.2020.22.1/macroq [published Online First: 2020/07/24]
3. Morris C, Simkiss D, Busk M, et al. Setting research priorities to improve the health of children and young people with neurodisability: a British Academy of Childhood Disability-James Lind Alliance Research Priority Setting Partnership. *BMJ Open* 2015;5(1):e006233. doi: 10.1136/bmjopen-2014-006233 [published Online First: 2015/01/30]

1  
2  
3  
4  
5  
6  
7  
8  
9  
10  
11  
12  
13  
14  
15  
16  
17  
18  
19  
20  
21  
22  
23  
24  
25  
26  
27  
28  
29  
30  
31  
32  
33  
34  
35  
36  
37  
38  
39  
40  
41  
42  
43  
44  
45  
46  
47  
48  
49  
50  
51  
52  
53  
54  
55  
56  
57  
58  
59  
60

4. Robinson-Shelton A, Malow BA. Sleep disturbances in neurodevelopmental disorders. *Curr Psychiatry Rep* 2016;18(1):6. doi: 10.1007/s11920-015-0638-1 [published Online First: 2016/01/01]
5. Abdelgadir IS, Gordon MA, Akobeng AK. Melatonin for the management of sleep problems in children with neurodevelopmental disorders: a systematic review and meta-analysis. *Arch Dis Child* 2018;103(12):1155-62. doi: 10.1136/archdischild-2017-314181 [published Online First: 2018/05/04]
6. Gringras P, Nir T, Breddy J, et al. Efficacy and safety of pediatric prolonged-release melatonin for insomnia in children with autism spectrum disorder. *J Am Acad Child Adolesc Psychiatry* 2017;56(11):948-57 e4. doi: 10.1016/j.jaac.2017.09.414 [published Online First: 2017/11/04]
7. Hollway JA, Aman MG. Pharmacological treatment of sleep disturbance in developmental disabilities: a review of the literature. *Res Dev Disabil* 2011;32(3):939-62. doi: 10.1016/j.ridd.2010.12.035 [published Online First: 2011/02/08]
8. Johnson CR. Sleep problems in children with mental retardation and autism. *Child Adolesc Psychiatr Clin N Am* 1996;5(3):673-84. doi: 10.1016/s1056-4993(18)30355-9
9. Gringras P, Gamble C, Jones AP, et al. Melatonin for sleep problems in children with neurodevelopmental disorders: randomised double masked placebo controlled trial. *BMJ* 2012;345:e6664. doi: 10.1136/bmj.e6664 [published Online First: 2012/11/07]
10. Devnani PA, Hegde AU. Autism and sleep disorders. *J Pediatr Neurosci* 2015;10(4):304-7. doi: 10.4103/1817-1745.174438 [published Online First: 2016/03/11]
11. Esposito S, Laino D, D'Alonzo R, et al. Pediatric sleep disturbances and treatment with melatonin. *J Transl Med* 2019;17(1):77. doi: 10.1186/s12967-019-1835-1 [published Online First: 2019/03/16]
12. Wang SY, Shi XC, Laborda P. Indole-based melatonin analogues: synthetic approaches and biological activity. *Eur J Med Chem* 2020;185:111847. doi: 10.1016/j.ejmech.2019.111847 [published Online First: 2019/11/16]
13. Xie Z, Chen F, Li WA, et al. A review of sleep disorders and melatonin. *Neurol Res* 2017;39(6):559-65. doi: 10.1080/01616412.2017.1315864 [published Online First: 2017/05/04]
14. Boafo A, Greenham S, Sullivan M, et al. Medications for sleep disturbance in children and adolescents with depression: a survey of Canadian child and adolescent psychiatrists. *Child Adolesc Psychiatry Ment Health* 2020;14:10. doi: 10.1186/s13034-020-00316-8 [published Online First: 2020/03/17]
15. Kimland EE, Bardage C, Collin J, et al. Pediatric use of prescribed melatonin in Sweden 2006-2017: a register based study. *Eur Child Adolesc Psychiatry* 2021;30(9):1339-50. doi: 10.1007/s00787-020-01598-1 [published Online First: 2020/07/24]
16. Owens JA, Rosen CL, Mindell JA, et al. Use of pharmacotherapy for insomnia in child psychiatry practice: A national survey. *Sleep Med* 2010;11(7):692-700. doi: 10.1016/j.sleep.2009.11.015 [published Online First: 2010/07/14]
17. Rzepka-Migut B, Paprocka J. Efficacy and safety of melatonin treatment in children with autism spectrum disorder and attention-deficit/hyperactivity disorder - a review of the literature. *Brain Sci* 2020;10(4) doi: 10.3390/brainsci10040219 [published Online First: 2020/04/11]
18. Schwichtenberg AJ, Malow BA. Melatonin treatment in children with developmental disabilities. *Sleep Med Clin* 2015;10(2):181-7. doi: 10.1016/j.jsmc.2015.02.008 [published Online First: 2015/06/10]
19. National Health Service. Melatonin for sleep problems. 2019

- 1
- 2
- 3
- 4
- 5 20. Cipolla-Neto J, Amaral FGD. Melatonin as a hormone: new physiological and clinical insights. *Endocr Rev* 2018;39(6):990-1028. doi: 10.1210/er.2018-00084 [published Online First: 2018/09/15]
- 6
- 7
- 8 21. Pévet P. Melatonin in animal models. *Dialogues Clin Neurosci* 2004;5(4):343-52. doi: 10.31887/DCNS.2003.5.4/ppevet
- 9
- 10 22. Tosini G, Owino S, Guillaume JL, et al. Understanding melatonin receptor pharmacology: latest insights from mouse models, and their relevance to human disease. *Bioessays* 2014;36(8):778-87. doi: 10.1002/bies.201400017 [published Online First: 2014/06/07]
- 11
- 12
- 13 23. Janjua I, Goldman RD. Sleep-related melatonin use in healthy children. *Can Fam Physician* 2016;62(4):315-16.
- 14
- 15
- 16 24. Karasek M. Melatonin, human aging, and age-related diseases. *Exp Gerontol* 2004;39(11-12):1723-9. doi: 10.1016/j.exger.2004.04.012 [published Online First: 2004/12/08]
- 17
- 18 25. Ferracioli-Oda E, Qawasmi A, Bloch MH. Meta-analysis: melatonin for the treatment of primary sleep disorders. *PLoS One* 2013;8(5):e63773. doi: 10.1371/journal.pone.0063773 [published Online First: 2013/05/17]
- 19
- 20 26. Rossignol DA, Frye RE. Melatonin in autism spectrum disorders: a systematic review and meta-analysis. *Dev Med Child Neurol* 2011;53(9):783-92. doi: 10.1111/j.1469-8749.2011.03980.x [published Online First: 2011/04/27]
- 21
- 22 27. Tordjman S, Anderson GM, Pichard N, et al. Nocturnal excretion of 6-sulphatoxymelatonin in children and adolescents with autistic disorder. *Biol Psychiatry* 2005;57(2):134-8. doi: 10.1016/j.biopsych.2004.11.003 [published Online First: 2005/01/18]
- 23
- 24 28. Parker A, Beresford B, Dawson V, et al. Oral melatonin for non-respiratory sleep disturbance in children with neurodisabilities: systematic review and meta-analyses. *Dev Med Child Neurol* 2019;61(8):880-90. doi: 10.1111/dmcn.14157 [published Online First: 2019/02/03]
- 25
- 26 29. Boafu A, Greenham S, Alenezi S, et al. Could long-term administration of melatonin to prepubertal children affect timing of puberty? A clinician's perspective. *Nat Sci Sleep* 2019;11:1-10. doi: 10.2147/NSS.S181365 [published Online First: 2019/02/19]
- 27
- 28 30. Kennaway DJ. Potential safety issues in the use of the hormone melatonin in paediatrics. *J Paediatr Child Health* 2015;51(6):584-9. doi: 10.1111/jpc.12840 [published Online First: 2015/02/04]
- 29
- 30 31. Abdallah N, Attia A, Montaser B. Role of melatonin in constitutional delayed puberty in boys. *Menoufia Med J* 2020;33(1) doi: 10.4103/mmj.mmj\_300\_18
- 31
- 32 32. Malow BA, Findling RL, Schroder CM, et al. Sleep, Growth, and Puberty After 2 Years of Prolonged-Release Melatonin in Children With Autism Spectrum Disorder. *J Am Acad Child Adolesc Psychiatry* 2021;60(2):252-61 e3. doi: 10.1016/j.jaac.2019.12.007 [published Online First: 2020/01/27]
- 33
- 34 33. ClinicalTrials.gov. Does melatonin restore sleep architecture in autistic children (SOMELIA) 2019 [Available from: <https://clinicaltrials.gov/ct2/show/study/NCT01993251> accessed 20 September 2021.
- 35
- 36 34. ClinicalTrials.gov. Treatment of sleep disturbance in children with ASD 2021 [Available from: <https://clinicaltrials.gov/ct2/show/NCT04878198> accessed 20 September 2021.
- 37
- 38 35. Moher D, Shamseer L, Clarke M, et al. Preferred reporting items for systematic review and meta-analysis protocols (PRISMA-P) 2015 statement. *Syst Rev* 2015;4(1):1.
- 39
- 40 36. Shamseer L, Moher D, Clarke M, et al. Preferred reporting items for systematic review and meta-analysis protocols (PRISMA-P) 2015: elaboration and explanation. *BMJ* 2015;349:7647.
- 41
- 42 37. American Psychiatric Association. Diagnostic and statistical manual of mental disorders (DSM-5®). Washington DC: American Psychiatric Publishing 2013.
- 43
- 44
- 45
- 46
- 47
- 48
- 49
- 50
- 51
- 52
- 53
- 54
- 55
- 56
- 57
- 58
- 59
- 60

- 1
- 2
- 3
- 4 38. World Health Organization. International Statistical Classification of Diseases and Related
- 5 Health Problems (ICD) 2021 [Available from:
- 6 <https://www.who.int/standards/classifications/classification-of-diseases> accessed 16
- 7 September 2021.
- 8
- 9 39. (International Conference on Harmonisation of Technical Requirements for Registration of
- 10 Pharmaceuticals for Human Use). ICH harmonised guideline: integrated addendum to ICH
- 11 E6(R1): guideline for good clinical practice (ICH-GCP). 2015; Step 2 version.
- 12 <https://ichgcp.net/da> (accessed 1 September, 2021).
- 13
- 14 40. Graham P, Stevenson J, Flynn D. A new measure of health-related quality of life for children:
- 15 Preliminary findings. *Psychology & Health* 1997;12(5):655-65. doi:
- 16 10.1080/08870449708407412
- 17
- 18 41. Ware J, Sherbourne C. The MOS 36-item short-form health survey (SF-36). I. Conceptual
- 19 framework and item selection. *Med Care* 1992;30(6):473-83.
- 20
- 21 42. Buysse DJ, Reynolds CF, Monk TH, et al. The Pittsburgh sleep quality index: A new instrument
- 22 for psychiatric practice and research. *Psychiatry Res* 1989;28(2):193-213. doi:
- 23 10.1016/0165-1781(89)90047-4
- 24
- 25 43. Wehmeier PM, Schacht A, Lehmann M, et al. Emotional well-being in children and adolescents
- 26 treated with atomoxetine for attention-deficit/hyperactivity disorder: findings from a patient,
- 27 parent and physician perspective using items from the pediatric adverse event rating scale
- 28 (PAERS). *Child Adolesc Psychiatry Ment Health* 2008;2(1):11. doi: 10.1186/1753-2000-2-
- 29 11 [published Online First: 20080528]
- 30
- 31 44. Higgins J, Thomas J, Chandler J, et al. Cochrane Handbook for Systematic Reviews of
- 32 Interventions: Cochrane, 2022, 2022.
- 33
- 34 45. StataCorp. Stata Statistical Software: Release 17 College Station, TX: StataCorp LLC; 2022
- 35 [cited 2020 Sep 1]. accessed 1 May 2022.
- 36
- 37 46. Copenhagen Trial Unit. TSA - Trial Sequential Analysis [Web page]. [Available from:
- 38 <http://www.ctu.dk/tsa/> accessed 1 May 2022.
- 39
- 40 47. Thorlund K, Engstrøm J, Wetterslev J, et al. User manual for trial sequential analysis (TSA).
- 41 Copenhagen, Denmark: Copenhagen Trial Unit, Centre for Clinical Intervention Research,
- 42 2011:1-115.
- 43
- 44 48. Covidence systematic review software VHI, Melbourne, Australia. Available at
- 45 [www.covidence.org](http://www.covidence.org).
- 46
- 47 49. Page MJ, McKenzie JE, Bossuyt PM, et al. The PRISMA 2020 statement: an updated guideline
- 48 for reporting systematic reviews. *BMJ* 2021;372:n71. doi: 10.1136/bmj.n71 [published
- 49 Online First: 2021/03/31]
- 50
- 51 50. Jakobsen JC, Gluud C, Wetterslev J, et al. When and how should multiple imputation be used
- 52 for handling missing data in randomised clinical trials—a practical guide with flowcharts.
- 53 *BMC Med Res Methodol* 2017;17(1):162.
- 54
- 55 51. Higgins JP, Thompson SG. Quantifying heterogeneity in a meta-analysis. *Stat Med*
- 56 2002;21(11):1539-58.
- 57
- 58 52. Higgins JP, Thompson SG, Deeks JJ, et al. Measuring inconsistency in meta-analyses. *BMJ*
- 59 2003;327(7414):557.
- 60
53. Harbord RM, Egger M, Sterne JA. A modified test for small-study effects in meta-analyses of
- controlled trials with binary endpoints. *Stat Med* 2006;25(20):3443-57.
54. Egger M, Smith GD, Schneider M, et al. Bias in meta-analysis detected by a simple, graphical
- test. *BMJ* 1997;315(7109):629-34.
55. Begg CB, Mazumdar M. Operating characteristics of a rank correlation test for publication bias.
- Biometrics* 1994:1088-101.



- 1  
2  
3  
4 56. Keus F, Wetterslev J, Gluud C, et al. Evidence at a glance: error matrix approach for  
5 overviewing available evidence. *BMC Med Res Methodol* 2010;10(1):90.  
6  
7 57. Jakobsen JC, Wetterslev J, Winkel P, et al. Thresholds for statistical and clinical significance in  
8 systematic reviews with meta-analytic methods. *BMC Med Res Methodol* 2014;14(1):120.  
9  
10 58. IntHout J, Ioannidis JPA, Borm GF. The Hartung-Knapp-Sidik-Jonkman method for random  
11 effects meta-analysis is straightforward and considerably outperforms the standard  
12 DerSimonian-Laird method. *BMC Med Res Methodol* 2014;14(1):25. doi: 10.1186/1471-  
13 2288-14-25  
14  
15 59. DeMets DL. Methods for combining randomized clinical trials: strengths and limitations. *Stat*  
16 *Med* 1987;6(3):341-48.  
17  
18 60. Fisher RA. On the interpretation of  $\chi^2$  from contingency tables, and the calculation of p. *J R*  
19 *Stat Soc* 1922;85(1) doi: 10.2307/2340521  
20  
21 61. Student. The probable error of a mean. *Biometrika* 1908;6(1) doi: 10.2307/2331554  
22  
23 62. Brok J, Thorlund K, Gluud C, et al. Trial sequential analysis reveals insufficient information  
24 size and potentially false positive results in many meta-analyses. *J Clin Epidemiol*  
25 2008;61(8):763-69.  
26  
27 63. Brok J, Thorlund K, Wetterslev J, et al. Apparently conclusive meta-analyses may be  
28 inconclusive—trial sequential analysis adjustment of random error risk due to repetitive  
29 testing of accumulating data in apparently conclusive neonatal meta-analyses. *Int J*  
30 *Epidemiol* 2008;38(1):287-98.  
31  
32 64. Copenhagen Trial Unit. Trial Sequential Analysis 2022 [Available from: <https://ctu.dk/tsa/>.  
33  
34 65. Imberger G, Thorlund K, Gluud C, et al. False-positive findings in Cochrane meta-analyses with  
35 and without application of trial sequential analysis: an empirical review. *BMJ Open*  
36 2016;6(8):e011890.  
37  
38 66. Thorlund K, Devereaux P, Wetterslev J, et al. Can trial sequential monitoring boundaries reduce  
39 spurious inferences from meta-analyses? *Int J Epidemiol* 2008;38(1):276-86.  
40  
41 67. Wetterslev J, Thorlund K, Brok J, et al. Trial sequential analysis may establish when firm  
42 evidence is reached in cumulative meta-analysis. *J Clin Epidemiol* 2008;61(1):64-75.  
43  
44 68. Arendt J, Skene DJ. Melatonin as a chronobiotic. *Sleep Med Rev* 2005;9(1):25-39. doi:  
45 10.1016/j.smrv.2004.05.002  
46  
47 69. Khullar A. The role of melatonin in the circadian rhythm sleep-wake cycle. *Psychiatr Times*  
48 2012;29(7):26.  
49  
50 70. Munday K, Benloucif S, Harsanyi K, et al. Phase-dependent treatment of delayed sleep phase  
51 syndrome with melatonin. *Sleep* 2005;28(10):1271-78. doi: 10.1093/sleep/28.10.1271  
52  
53 71. Guyatt GH, Oxman AD, Vist GE, et al. GRADE: an emerging consensus on rating quality of  
54 evidence and strength of recommendations. *BMJ* 2008;336(7650):924-6. doi:  
55 10.1136/bmj.39489.470347.AD  
56  
57  
58  
59  
60

**PRISMA-P (Preferred Reporting Items for Systematic review and Meta-Analysis Protocols) 2015 checklist: recommended items to address in a systematic review protocol\***

| Section and topic                 | Item No | Checklist item                                                                                                                                                                                                                | Section                                          |
|-----------------------------------|---------|-------------------------------------------------------------------------------------------------------------------------------------------------------------------------------------------------------------------------------|--------------------------------------------------|
| <b>ADMINISTRATIVE INFORMATION</b> |         |                                                                                                                                                                                                                               |                                                  |
| Title:                            |         |                                                                                                                                                                                                                               |                                                  |
| Identification                    | 1a      | Identify the report as a protocol of a systematic review                                                                                                                                                                      | Title                                            |
| Update                            | 1b      | If the protocol is for an update of a previous systematic review, identify as such                                                                                                                                            | N/A                                              |
| Registration                      | 2       | If registered, provide the name of the registry (such as PROSPERO) and registration number                                                                                                                                    | Abstract                                         |
| Authors:                          |         |                                                                                                                                                                                                                               |                                                  |
| Contact                           | 3a      | Provide name, institutional affiliation, e-mail address of all protocol authors; provide physical mailing address of corresponding author                                                                                     | Title page                                       |
| Contributions                     | 3b      | Describe contributions of protocol authors and identify the guarantor of the review                                                                                                                                           | Contributors                                     |
| Amendments                        | 4       | If the protocol represents an amendment of a previously completed or published protocol, identify as such and list changes; otherwise, state plan for documenting important protocol amendments                               | Differences between the protocol and the review  |
| Support:                          |         |                                                                                                                                                                                                                               |                                                  |
| Sources                           | 5a      | Indicate sources of financial or other support for the review                                                                                                                                                                 | Funding                                          |
| Sponsor                           | 5b      | Provide name for the review funder and/or sponsor                                                                                                                                                                             | Funding                                          |
| Role of sponsor or funder         | 5c      | Describe roles of funder(s), sponsor(s), and/or institution(s), if any, in developing the protocol                                                                                                                            | N/A                                              |
| <b>INTRODUCTION</b>               |         |                                                                                                                                                                                                                               |                                                  |
| Rationale                         | 6       | Describe the rationale for the review in the context of what is already known                                                                                                                                                 | Why it is important to do this review            |
| Objectives                        | 7       | Provide an explicit statement of the question(s) the review will address with reference to participants, interventions, comparators, and outcomes (PICO)                                                                      | Why it is important to do this review            |
| <b>METHODS</b>                    |         |                                                                                                                                                                                                                               |                                                  |
| Eligibility criteria              | 8       | Specify the study characteristics (such as PICO, study design, setting, time frame) and report characteristics (such as years considered, language, publication status) to be used as criteria for eligibility for the review | Criteria for considering studies for this review |
| Information sources               | 9       | Describe all intended information sources (such as electronic databases, contact with study authors, trial registers or other grey literature sources) with planned dates of coverage                                         | Search methods for identification of studies     |
| Search strategy                   | 10      | Present draft of search strategy to be used for at least one electronic database, including planned limits, such that                                                                                                         | Supplementary material 2                         |



1  
2  
3  
4  
5  
6  
7  
8  
9  
10  
11  
12  
13  
14  
15  
16  
17  
18  
19  
20  
21  
22  
23  
24  
25  
26  
27  
28  
29  
30  
31

| it could be repeated               |     |                                                                                                                                                                                                                                                  |                                                                            |
|------------------------------------|-----|--------------------------------------------------------------------------------------------------------------------------------------------------------------------------------------------------------------------------------------------------|----------------------------------------------------------------------------|
| Study records:                     |     |                                                                                                                                                                                                                                                  |                                                                            |
| Data management                    | 11a | Describe the mechanism(s) that will be used to manage records and data throughout the review                                                                                                                                                     | Data collection and analysis                                               |
| Selection process                  | 11b | State the process that will be used for selecting studies (such as two independent reviewers) through each phase of the review (that is, screening, eligibility and inclusion in meta-analysis)                                                  | Selection of studies                                                       |
| Data collection process            | 11c | Describe planned method of extracting data from reports (such as piloting forms, done independently, in duplicate), any processes for obtaining and confirming data from investigators                                                           | Data extraction and management                                             |
| Data items                         | 12  | List and define all variables for which data will be sought (such as PICO items, funding sources), any pre-planned data assumptions and simplifications                                                                                          | Data extraction and management                                             |
| Outcomes and prioritization        | 13  | List and define all outcomes for which data will be sought, including prioritization of main and additional outcomes, with rationale                                                                                                             | Types of outcomes measures                                                 |
| Risk of bias in individual studies | 14  | Describe anticipated methods for assessing risk of bias of individual studies, including whether this will be done at the outcome or study level, or both; state how this information will be used in data synthesis                             | Assessment of risk of bias in included studies                             |
| Data synthesis                     | 15a | Describe criteria under which study data will be quantitatively synthesised                                                                                                                                                                      | Data synthesis                                                             |
|                                    | 15b | If data are appropriate for quantitative synthesis, describe planned summary measures, methods of handling data and methods of combining data from studies, including any planned exploration of consistency (such as $I^2$ , Kendall's $\tau$ ) | Dealing with missing data, Assessment of heterogeneity                     |
|                                    | 15c | Describe any proposed additional analyses (such as sensitivity or subgroup analyses, meta-regression)                                                                                                                                            | Subgroup analysis and investigation of heterogeneity, Sensitivity analysis |
|                                    | 15d | If quantitative synthesis is not appropriate, describe the type of summary planned                                                                                                                                                               | Unit of analysis issues                                                    |
| Meta-bias(es)                      | 16  | Specify any planned assessment of meta-bias(es) (such as publication bias across studies, selective reporting within studies)                                                                                                                    | Assessment of reporting biases                                             |
| Confidence in cumulative evidence  | 17  | Describe how the strength of the body of evidence will be assessed (such as GRADE)                                                                                                                                                               | Summary of findings and assessment of the certainty of the evidence        |

32  
33  
34  
35

**\* It is strongly recommended that this checklist be read in conjunction with the PRISMA-P Explanation and Elaboration (cite when available) for important clarification on the items. Amendments to a review protocol should be tracked and dated. The copyright for PRISMA-P (including checklist) is held by the PRISMA-P Group and is distributed under a Creative Commons Attribution Licence 4.0.**

36  
37  
38  
39  
40  
41  
42  
43  
44  
45  
46

*From: Shamseer L, Moher D, Clarke M, Ghersi D, Liberati A, Petticrew M, Shekelle P, Stewart L, PRISMA-P Group. Preferred reporting items for systematic review and meta-analysis protocols (PRISMA-P) 2015: elaboration and explanation. BMJ. 2015 Jan 2;349(jan02 1):g7647.*

**Search strategies for  
Melatonin for neurodevelopmental disorders and non-respiratory sleep disorders  
Preliminary searches prepared 3 June 2022**

**Cochrane Central Register of Controlled Trials (latest issue) in the Cochrane Library**

- #1 MeSH descriptor: [Neurodevelopmental Disorders] explode all trees
- #2 MeSH descriptor: [Central Nervous System Diseases] explode all trees
- #3 MeSH descriptor: [Intellectual Disability] explode all trees
- #4 (((neurodevelopment\* or neurotic\* or development\* or mental\* or central nervous system or cns or intellectual\* or ((disruptive or child) and behavio\*) or Communicati\* or speech\* or language or Learning or Motor\* or psychomotor or Reactive Attachment\* or Stereotypic Movement\*) and (disease\* or disorder\* or disabilit\* or syndrom\* or dysfunc\* or impair\* or deficienc\* or retardation\*)) or neurodisabilit\* or neuro-disabilit\* or idiocy or dyslexia or dyscalculia or autism\* or kaunner\* or ASD or Asperger\* or attention deficit\* or ADHD\* or ADDH or hyperactivity\* or impulsiv\* cerebral pals\* or spastic displeg\* or epilep\* or mutism\* or tic\* or Tourette\* or ((happy or child\*) and puppet\*) or fragile x or Frax\* or angelman\* or prader-willi\* or rett\* or smith-magenis or williams or Cri-du-Chat or De Lange or down\* or Coffin-Lowry or Lesch-Nyhan or Menkes Kinky Hair or Rubinstein-Taybi or WAGR or schizophreni\* or Adrenoleukodystrophy or Mucopolysaccharidosis)
- #5 #1 or #2 or #3 or #4
- #6 MeSH descriptor: [Melatonin] explode all trees
- #7 (melatonin\* or Circadin\* or Slenyto\* or (Methoxy near Acetyl near tryptamin\*))
- #8 #6 or #7
- #9 #5 and #8
- #10 MeSH descriptor: [Adolescent] explode all trees
- #11 MeSH descriptor: [Child] explode all trees
- #12 MeSH descriptor: [Infant] explode all trees
- #13 MeSH descriptor: [Pediatrics] explode all trees
- #14 (baby or babies or infan\* or child\* or toddler\* or pre-school\* or preschool\* or adolescen\* or teen\* or schoolchild\* or schoolage\* or pediatric\* or paediatric\*)
- #15 #10 or #11 or #12 or #13 or #14
- #16 #9 and #15

**MEDLINE Ovid (1946 to the date of the search)**

1. exp Neurodevelopmental Disorders/
2. exp Central Nervous System Diseases/
3. exp Intellectual Disability/
4. (((neurodevelopment\* or neurotic\* or development\* or mental\* or central nervous system or cns or intellectual\* or ((disruptive or child) and behavio\*) or Communicati\* or speech\* or language or Learning or Motor\* or psychomotor or Reactive Attachment\* or Stereotypic Movement\*) and (disease\* or disorder\* or disabilit\* or syndrom\* or dysfunc\* or impair\* or deficienc\* or retardation\*)) or neurodisabilit\* or neuro-disabilit\* or idiocy or dyslexia or dyscalculia or autism\* or kanner\* or ASD or Asperger\* or attention deficit\* or ADHD\* or ADDH or hyperactivity\* or impulsiv\* cerebral pals\* or spastic displeg\* or epilep\* or mutism\* or tic\* or Tourette\* or ((happy or child\*) and puppet\*) or fragile x or Frax\* or angelman\* or prader-willi\* or rett\* or smith-magenis or williams or Cri-du-Chat or De Lange or down\* or Coffin-Lowry or Lesch-Nyhan or Menkes Kinky Hair or Rubinstein-Taybi or WAGR or schizophreni\* or Adrenoleukodystrophy or Mucopolysaccharidosis).mp. [mp=title, abstract, original title, name of substance word, subject heading word, floating sub-heading word, keyword heading word, organism supplementary concept word, protocol supplementary concept word, rare disease supplementary concept word, unique identifier, synonyms]
5. 1 or 2 or 3 or 4
6. exp Melatonin/
7. (melatonin\* or Circadin\* or Slenyto\* or 5-Methoxy-N-Acetyltryptamin\* or N-Acetyl-5-Methoxytryptamin\*).mp. [mp=title, abstract, original title, name of substance word, subject heading word, floating sub-heading word, keyword heading word, organism supplementary concept word, protocol supplementary concept word, rare disease supplementary concept word, unique identifier, synonyms]
8. 6 or 7
9. 5 and 8
10. exp adolescent/ or exp child/ or exp infant/
11. exp Pediatrics/
12. (baby or babies or infan\* or child\* or toddler\* or pre-school\* or preschool\* or adolescen\* or teen\* or schoolchild\* or schoolage\* or pediatric\* or paediatric\*).mp. [mp=title, abstract, original title, name of substance word, subject heading word, floating sub-heading word, keyword heading word, organism supplementary concept word, protocol supplementary concept word, rare disease supplementary concept word, unique identifier, synonyms]

13. 10 or 11 or 12
14. 9 and 13
15. (randomized controlled trial or controlled clinical trial or retracted publication or retraction of publication).pt. or clinical trials as topic.sh. or trial.ti.
16. (random\* or blind\* or placebo\*).mp. [mp=title, abstract, original title, name of substance word, subject heading word, floating sub-heading word, keyword heading word, organism supplementary concept word, protocol supplementary concept word, rare disease supplementary concept word, unique identifier, synonyms]
17. 14 and (15 or 16)

#### Embase Ovid (1974 to the date of the search)

1. exp mental disease/
2. exp central nervous system disease/
3. exp intellectual impairment/
4. (((neurodevelopment\* or neurotic\* or development\* or mental\* or central nervous system or cns or intellectual\* or ((disruptive or child) and behavio\*) or Communicati\* or speech\* or language or Learning or Motor\* or psychomotor or Reactive Attachment\* or Stereotypic Movement\*) and (disease\* or disorder\* or disabilit\* or syndrom\* or dysfunc\* or impair\* or deficienc\* or retardation\*)) or neurodisabilit\* or neuro-disabilit\* or idiocy or dyslexia or dyscalculia or autis\* or kanner\* or ASD or Asperger\* or attention deficit\* or ADHD\* or ADDH or hyperactivity\* or impulsiv\* cerebral pals\* or spastic dispieg\* or epilep\* or mutism\* or tic\* or Tourette\* or ((happy or child\*) and puppet\*) or fragile x or Frax\* or angelman\* or prader-willi\* or rett\* or smith-magenis or williams or Cri-du-Chat or De Lange or down\* or Coffin-Lowry or Lesch-Nyhan or Menkes Kinky Hair or Rubinstein-Taybi or WAGR or schizophreni\* or Adrenoleukodystrophy or Mucopolysaccharidosis).mp. [mp=title, abstract, heading word, drug trade name, original title, device manufacturer, drug manufacturer, device trade name, keyword heading word, floating subheading word, candidate term word]
5. 1 or 2 or 3 or 4
6. exp melatonin/
7. (melatonin\* or Circadin\* or Slenyto\* or 5-Methoxy-N-Acetyltryptamin\* or N-Acetyl-5-Methoxytryptamin\*).mp. [mp=title, abstract, heading word, drug trade name, original title, device manufacturer, drug manufacturer, device trade name, keyword heading word, floating subheading word, candidate term word]
8. 6 or 7
9. 5 and 8
10. exp adolescent/ or exp child/
11. exp pediatrics/
12. (baby or babies or infan\* or child\* or toddler\* or pre-school\* or preschool\* or adolescen\* or teen\* or schoolchild\* or schoolage\* or pediatric\* or paediatric\*).mp. [mp=title, abstract, heading word, drug trade name, original title, device manufacturer, drug manufacturer, device trade name, keyword heading word, floating subheading word, candidate term word]
13. 10 or 11 or 12
14. 9 and 13
15. Randomized controlled trial/ or Controlled clinical trial/ or retracted article/ or (erratum or tombstone).pt. or trial.ti. or yes.ne.
16. (random\* or blind\* or placebo\*).mp. [mp=title, abstract, heading word, drug trade name, original title, device manufacturer, drug manufacturer, device trade name, keyword heading word, floating subheading word, candidate term word]
17. 14 and (15 or 16)

#### LILACS (Bireme; 1982 to the date of the search)

(((neurodevelopment\$ or neurotic\$ or development\$ or mental\$ or central nervous system or cns or intellectual\$ or ((disruptive or child) and behavio\$) or Communicati\$ or speech\$ or language or Learning or Motor\$ or psychomotor or Reactive Attachment\$ or Stereotypic Movement\$) and (disease\$ or disorder\$ or disabilit\$ or syndrom\$ or dysfunc\$ or impair\$ or deficienc\$ or retardation\$)) or neurodisabilit\$ or neuro-disabilit\$ or idiocy or dyslexia or dyscalculia or autis\$ or kanner\$ or ASD or Asperger\$ or attention deficit\$ or ADHD\$ or ADDH or hyperactivity\$ or impulsiv\$ cerebral pals\$ or spastic dispieg\$ or epilep\$ or mutism\$ or tic\$ or Tourette\$ or ((happy or child\$) and puppet\$) or fragile x or Frax\$ or angelman\$ or prader-willi\$ or rett\$ or smith-magenis or williams or Cri-du-Chat or De Lange or down\$ or Coffin-Lowry or Lesch-Nyhan or Menkes Kinky Hair or Rubinstein-Taybi or WAGR or schizophreni\$ or Adrenoleukodystrophy or Mucopolysaccharidosis) [Words] and (melatonin\$ or Circadin\$ or Slenyto\$ or 5-Methoxy-N-Acetyltryptamin\$ or N-Acetyl-5-Methoxytryptamin\$) [Words] and (baby or babies or infan\$ or child\$ or toddler\$ or pre-school\$ or preschool\$ or adolescen\$ or teen\$ or schoolchild\$ or schoolage\$ or pediatric\$ or paediatric\$) [Words]

#### PsycINFO (EBSCO Host; date will be given at review stage)

S11 S9 AND S10

1  
2  
3 S10 TX (random\* or blind\* or placebo\* or trial\*)  
4 S9 S5 AND S8  
5 S8 S6 OR S7  
6 S7 TX (melatonin\* or Circadin\* or Slenyto\* or 5-Methoxy-N-Acetyltryptamin\* or N-Acetyl-5-  
7 Methoxytryptamin\*)  
8 S6 MA Melatonin  
9 S5 S1 OR S2 OR S3 OR S4  
10 S4 TX (((neurodevelopment\* or neurotic\* or development\* or mental\* or central nervous system or cns or  
11 intellectual\* or ((disruptive or child) and behavio\*) or Communicati\* or speech\* or language or Learning or Motor\* or  
12 psychomotor or Reactive Attachment\* or Stereotypic Movement\*) and (disease\* or disorder\* or disabilit\* or syndrom\*  
13 or dysfunc\* or impair\* or deficienc\* or retardation\*)) or neurodisabilit\* or neuro-disabilit\* or idiocy or dyslexia or  
14 dyscalculia or autis\* or kanner\* or ASD or Asperger\* or attention deficit\* or ADHD\* or ADDH or hyperactivity\* or  
15 impulsiv\* cerebral pals\* or spastic dispieg\* or epilep\* or mutism\* or tic\* or Tourette\* or ((happy or child\*) and  
16 puppet\*) or fragile x or Frax\* or angelman\* or prader-willi\* or rett\* or smith-magenis or williams or Cri-du-Chat or De  
17 Lange or down\* or Coffin-Lowry or Lesch-Nyhan or Menkes Kinky Hair or Rubinstein-Taybi or WAGR or  
18 schizophreni\* or Adrenoleukodystrophy or Mucopolysaccharidosis)  
19 S3 MA Intellectual Disability  
20 S2 MA Central Nervous System Diseases  
21 S1 MA Neurodevelopmental Disorders

22 **Science Citation Index Expanded (1900 to the date of the search) and Conference Proceedings Citation Index –**  
23 **Science (1990 to the date of the search) (Web of Science)**

24 #5 #4 AND #3 AND #2 AND #1

25 #4 TI=(random\* or blind\* or placebo\* or trial\*) OR TS=(random\* or blind\* or placebo\*)

26 #3 TS=(baby or babies or infan\* or child\* or toddler\* or pre-school\* or preschool\* or adolescen\* or teen\* or  
27 schoolchild\* or schoolage\* or pediatric\* or paediatric\*)

28 #2 TS=(melatonin\* or Circadin\* or Slenyto\* or 5-Methoxy-N-Acetyltryptamin\* or N-Acetyl-5-Methoxytryptamin\*)

29 #1 TS=(((neurodevelopment\* or neurotic\* or development\* or mental\* or central nervous system or cns or intellectual\*  
30 or ((disruptive or child) and behavio\*) or Communicati\* or speech\* or language or Learning or Motor\* or psychomotor  
31 or Reactive Attachment\* or Stereotypic Movement\*) and (disease\* or disorder\* or disabilit\* or syndrom\* or dysfunc\* or  
32 impair\* or deficienc\* or retardation\*)) or neurodisabilit\* or neuro-disabilit\* or idiocy or dyslexia or dyscalculia or autis\*  
33 or kanner\* or ASD or Asperger\* or attention deficit\* or ADHD\* or ADDH or hyperactivity\* or impulsiv\* cerebral pals\*  
34 or spastic dispieg\* or epilep\* or mutism\* or tic\* or Tourette\* or ((happy or child\*) and puppet\*) or fragile x or Frax\* or  
35 angelman\* or prader-willi\* or rett\* or smith-magenis or williams or Cri-du-Chat or De Lange or down\* or Coffin-Lowry  
36 or Lesch-Nyhan or Menkes Kinky Hair or Rubinstein-Taybi or WAGR or schizophreni\* or Adrenoleukodystrophy or  
37 Mucopolysaccharidosis)
